# Supplementary material for: In Silico Investigation of Symptom Development Model Based on Coat Protein Interactions of Two Cucumber Mosaic Virus Strains
Source: Research Square preprint supplement (doi:10.21203/rs.3.rs-154008/v1), 2021-02-11
Supplement: Supplementary file 1 [file 33d3260563751d69e8cce8e6.xlsx]

## Sheet: RG
Time (ns)	Pentamer M-CMV CP	Pentamer Q-CMV CP	Hexamer M-CMV CP	Hexamer Q-CMV CP
0	1.95627	2.10069	1.99381	1.98322
0.01	1.97319	2.1139	2.0018	2.00945
0.02	1.95736	2.10436	2.01047	2.03522
0.03	1.96062	2.12191	2.0104	2.04176
0.04	1.96021	2.11582	2.01652	2.03713
0.05	1.97571	2.10938	2.00914	2.02767
0.06	1.966	2.10209	2.00646	2.03343
0.07	1.9751	2.10104	2.01135	2.01015
0.08	1.95973	2.11284	2.01551	2.01877
0.09	1.97169	2.09843	2.00844	2.01083
0.1	1.97209	2.08977	2.01611	1.98385
0.11	1.982	2.08192	2.01069	1.97804
0.12	1.97551	2.08218	2.00773	1.97085
0.13	1.98008	2.07864	2.00755	1.97059
0.14	1.98749	2.07981	2.00755	1.98709
0.15	1.99886	2.08968	2.02532	1.98784
0.16	1.9964	2.09434	2.01113	1.98029
0.17	1.99303	2.11179	2.02052	1.9858
0.18	1.99467	2.09798	2.02948	1.99941
0.19	2.00188	2.10193	2.03744	2.00133
0.2	2.00447	2.07852	2.03921	1.99165
0.21	1.99137	2.09028	2.03847	1.99229
0.22	1.98507	2.10085	2.02059	1.99976
0.23	1.98387	2.10295	2.03484	1.98905
0.24	1.96804	2.11143	2.03775	1.98139
0.25	1.98829	2.11899	2.01981	1.99245
0.26	1.96962	2.1132	2.02701	1.98326
0.27	1.96674	2.12232	2.01786	1.98751
0.28	1.97223	2.1273	2.01787	1.97611
0.29	1.96817	2.11803	2.01517	1.97509
0.3	1.97498	2.1119	2.02004	1.9693
0.31	1.97833	2.11743	2.01153	1.98492
0.32	1.99355	2.11985	2.01278	1.99409
0.33	1.97939	2.12288	2.00577	1.97862
0.34	1.97697	2.11829	2.01698	1.98221
0.35	1.97587	2.11791	2.02227	1.9807
0.36	1.97016	2.12448	2.01958	1.9871
0.37	1.97668	2.1337	2.01091	1.97222
0.38	1.96796	2.15115	2.01914	1.9651
0.39	1.97611	2.15106	2.02065	1.95139
0.4	1.97492	2.14691	2.01841	1.96025
0.41	1.98159	2.13945	2.01995	1.97075
0.42	1.9684	2.1439	2.01926	1.98086
0.43	1.9771	2.12162	2.00744	1.97805
0.44	1.9651	2.14475	2.01371	1.98147
0.45	1.95763	2.14691	2.00983	1.99037
0.46	1.97184	2.147	2.0088	1.98766
0.47	1.97303	2.14724	2.01498	1.98746
0.48	1.9616	2.1593	2.01689	1.988
0.49	1.94732	2.15383	2.01281	1.9798
0.5	1.95358	2.1352	2.01772	1.98326
0.51	1.9538	2.14576	2.01696	1.97062
0.52	1.95456	2.1485	2.01676	1.97621
0.53	1.95655	2.14375	2.01889	1.97938
0.54	1.95532	2.13768	2.01651	1.97777
0.55	1.96091	2.15236	2.00753	1.97703
0.56	1.95208	2.14919	2.01532	1.97648
0.57	1.95971	2.14293	2.00697	1.97835
0.58	1.97035	2.15358	2.01185	1.97188
0.59	1.96754	2.15441	2.01845	1.97822
0.6	1.96281	2.16676	2.00381	1.9606
0.61	1.96351	2.16336	2.00974	1.96724
0.62	1.9686	2.15462	2.01932	1.98628
0.63	1.97119	2.15764	2.01731	1.99365
0.64	1.96122	2.15691	2.03905	1.98688
0.65	1.96129	2.15903	2.02475	1.98575
0.66	1.95524	2.16312	2.02687	1.97448
0.67	1.95013	2.15841	2.02308	1.97527
0.68	1.95914	2.15526	2.02736	1.98498
0.69	1.95743	2.13125	2.03056	1.9895
0.7	1.95462	2.14451	2.02668	1.97784
0.71	1.95902	2.13557	2.03053	1.97433
0.72	1.95631	2.15578	2.03364	1.98244
0.73	1.94489	2.13814	2.02491	1.97577
0.74	1.94394	2.13186	2.0286	1.95667
0.75	1.94191	2.12324	2.01996	1.95806
0.76	1.9308	2.13032	2.02792	1.95171
0.77	1.93765	2.12032	2.03152	1.94804
0.78	1.94504	2.1223	2.02683	1.93395
0.79	1.95486	2.1146	2.04215	1.91669
0.8	1.95629	2.10432	2.01956	1.92397
0.81	1.95092	2.1191	2.02775	1.93045
0.82	1.95302	2.13207	2.04403	1.92346
0.83	1.9461	2.11795	2.03337	1.9208
0.84	1.95919	2.12253	2.03459	1.91494
0.85	1.95589	2.11844	2.02474	1.931
0.86	1.95185	2.11289	2.03373	1.92852
0.87	1.95459	2.11994	2.01804	1.92758
0.88	1.95693	2.11951	2.02074	1.92427
0.89	1.95003	2.12543	2.0346	1.93107
0.9	1.95395	2.10075	2.02691	1.93419
0.91	1.94604	2.09434	2.03429	1.92733
0.92	1.94989	2.09803	2.02742	1.92926
0.93	1.95159	2.09769	2.03993	1.94914
0.94	1.95996	2.095	2.02317	1.94798
0.95	1.97789	2.09184	2.03684	1.96888
0.96	1.96629	2.10052	2.01773	1.96876
0.97	1.97156	2.09489	2.02405	1.9628
0.98	1.95813	2.07819	2.02582	1.95998
0.99	1.96856	2.07703	2.03487	1.94906
1	1.9646	2.0727	2.03312	1.96144
1.01	1.96608	2.06249	2.03275	1.97264
1.02	1.97822	2.05732	2.0252	1.95424
1.03	1.97049	2.06229	2.02933	1.95924
1.04	1.96948	2.05971	2.03287	1.95707
1.05	1.97646	2.07232	2.03107	1.9598
1.06	1.97059	2.06068	2.02899	1.95716
1.07	1.96948	2.06026	2.02748	1.95143
1.08	1.96769	2.06684	2.02996	1.95465
1.09	1.96466	2.05466	2.01829	1.95928
1.1	1.96044	2.06263	2.02784	1.96196
1.11	1.95257	2.07403	2.0247	1.95535
1.12	1.94778	2.07335	2.01546	1.95588
1.13	1.95334	2.06833	2.01387	1.94544
1.14	1.94716	2.07818	2.00658	1.94646
1.15	1.94624	2.085	2.01677	1.94764
1.16	1.94425	2.05974	2.0203	1.95449
1.17	1.95714	2.06517	2.01562	1.94198
1.18	1.94841	2.07662	2.01035	1.93863
1.19	1.94893	2.08249	2.01971	1.93606
1.2	1.94377	2.11231	2.02324	1.93837
1.21	1.94957	2.12103	2.02685	1.93142
1.22	1.93826	2.10577	2.00842	1.9352
1.23	1.9448	2.09617	2.01265	1.9497
1.24	1.94555	2.09132	2.01425	1.94577
1.25	1.9467	2.10121	2.02117	1.95324
1.26	1.94251	2.10368	2.0197	1.95549
1.27	1.94165	2.08149	2.00949	1.95602
1.28	1.93558	2.06864	2.00868	1.96814
1.29	1.93374	2.07161	2.01737	1.9576
1.3	1.93154	2.08534	2.02193	1.95029
1.31	1.94233	2.06807	2.02544	1.94621
1.32	1.9337	2.09065	2.01904	1.94808
1.33	1.94882	2.0982	2.01839	1.95882
1.34	1.94692	2.08462	2.02159	1.96396
1.35	1.93969	2.10147	2.0173	1.94759
1.36	1.94737	2.08777	2.01962	1.94939
1.37	1.93569	2.10638	2.02358	1.95566
1.38	1.94616	2.10421	2.02492	1.94177
1.39	1.95004	2.137	2.0268	1.95317
1.4	1.94236	2.15396	2.02472	1.94902
1.41	1.93823	2.15371	2.02822	1.94795
1.42	1.93312	2.14849	2.02974	1.95132
1.43	1.93323	2.14153	2.03559	1.93378
1.44	1.93498	2.13609	2.04113	1.94919
1.45	1.93355	2.13417	2.0338	1.94996
1.46	1.93963	2.13811	2.0253	1.9483
1.47	1.94551	2.14866	2.018	1.94295
1.48	1.94243	2.14111	2.01757	1.92812
1.49	1.93268	2.14513	2.01841	1.95147
1.5	1.9297	2.15622	2.03039	1.95401
1.51	1.93078	2.16384	2.03063	1.94834
1.52	1.92297	2.16104	2.0198	1.95554
1.53	1.92233	2.16519	2.02383	1.9329
1.54	1.92253	2.15259	2.0339	1.93046
1.55	1.92309	2.14517	2.02255	1.93199
1.56	1.91812	2.16213	2.02499	1.91164
1.57	1.91584	2.15351	2.01879	1.92337
1.58	1.92159	2.14776	2.02519	1.91933
1.59	1.91789	2.15672	2.01185	1.91757
1.6	1.91739	2.16801	2.01927	1.92549
1.61	1.91983	2.1653	2.0065	1.90663
1.62	1.93584	2.16634	2.00986	1.90336
1.63	1.92828	2.15738	2.00922	1.88486
1.64	1.9217	2.1747	2.0115	1.90049
1.65	1.9247	2.17525	2.00561	1.88502
1.66	1.9206	2.18925	2.00209	1.88499
1.67	1.91635	2.17933	2.00465	1.88033
1.68	1.92087	2.18089	2.0155	1.87553
1.69	1.92568	2.17475	2.02003	1.87424
1.7	1.931	2.19035	2.01701	1.87604
1.71	1.92339	2.20513	2.0191	1.87115
1.72	1.92934	2.19941	2.02387	1.89337
1.73	1.92413	2.19719	2.02204	1.88896
1.74	1.93299	2.18427	2.02092	1.87712
1.75	1.93369	2.20818	2.01643	1.89026
1.76	1.93584	2.19684	2.01316	1.88787
1.77	1.91674	2.18858	2.00703	1.88895
1.78	1.92133	2.18737	2.01021	1.91484
1.79	1.92168	2.19386	2.00359	1.90476
1.8	1.92772	2.17715	1.98372	1.89653
1.81	1.92235	2.18396	1.99952	1.89325
1.82	1.92869	2.17139	2.00102	1.89754
1.83	1.92566	2.16374	2.00582	1.8862
1.84	1.92992	2.15517	1.99674	1.87049
1.85	1.93008	2.16251	2.00065	1.8858
1.86	1.92672	2.16349	2.00238	1.88098
1.87	1.93823	2.16667	1.98984	1.89531
1.88	1.92927	2.15384	2.00283	1.89328
1.89	1.92448	2.15735	2.00184	1.88857
1.9	1.93002	2.15328	1.99949	1.89591
1.91	1.92994	2.15744	2.00482	1.88346
1.92	1.92603	2.14865	1.98748	1.89231
1.93	1.92921	2.16625	1.99904	1.88461
1.94	1.93545	2.15825	1.98934	1.89402
1.95	1.91613	2.13746	1.99145	1.8964
1.96	1.91743	2.15066	1.99287	1.90328
1.97	1.92152	2.16213	2.00105	1.8979
1.98	1.92003	2.15046	2.00009	1.90512
1.99	1.92154	2.16535	1.99813	1.89361
2	1.9106	2.15812	1.98873	1.88858
2.01	1.92693	2.17056	1.99401	1.88323
2.02	1.91018	2.15255	1.99385	1.8857
2.03	1.91712	2.14772	1.99751	1.87584
2.04	1.91903	2.12606	1.99634	1.8628
2.05	1.90933	2.12812	1.98622	1.87689
2.06	1.90794	2.14881	1.97805	1.87658
2.07	1.92064	2.13848	1.98032	1.87059
2.08	1.91911	2.15556	1.98666	1.87019
2.09	1.91487	2.16457	1.98401	1.85069
2.1	1.90243	2.17227	1.98384	1.85679
2.11	1.89508	2.17884	1.98812	1.85673
2.12	1.89	2.18469	1.97949	1.85712
2.13	1.88237	2.18052	1.98631	1.84845
2.14	1.89459	2.18285	1.97687	1.85583
2.15	1.89655	2.17991	1.9833	1.8555
2.16	1.90623	2.18215	1.99198	1.84261
2.17	1.90879	2.18178	2.00138	1.83774
2.18	1.90332	2.18104	2.00064	1.84937
2.19	1.90532	2.16856	2.00027	1.86107
2.2	1.89504	2.17357	1.9984	1.86469
2.21	1.9066	2.18868	1.99813	1.85476
2.22	1.90508	2.17626	1.9968	1.85891
2.23	1.9075	2.18436	1.9939	1.86943
2.24	1.90391	2.19242	1.98273	1.86792
2.25	1.89935	2.18654	1.99362	1.87351
2.26	1.90899	2.17272	2.00258	1.87836
2.27	1.91303	2.16008	1.99781	1.87241
2.28	1.91256	2.15729	2.00783	1.89474
2.29	1.91325	2.15599	2.00309	1.89593
2.3	1.91288	2.15384	1.9899	1.88803
2.31	1.91903	2.14961	1.99805	1.88929
2.32	1.90526	2.15383	2.00662	1.88501
2.33	1.90873	2.1614	2.00581	1.88607
2.34	1.91857	2.15943	2.01171	1.88496
2.35	1.90739	2.15426	2.01683	1.87996
2.36	1.9077	2.143	2.01382	1.88642
2.37	1.91817	2.15657	2.01909	1.8722
2.38	1.90881	2.16353	2.01585	1.87515
2.39	1.90104	2.16808	2.02728	1.8648
2.4	1.90404	2.19255	2.01741	1.8691
2.41	1.91042	2.18489	2.01461	1.86706
2.42	1.91628	2.17949	2.00202	1.86603
2.43	1.91073	2.20315	2.00059	1.84724
2.44	1.90396	2.18285	2.00027	1.83676
2.45	1.91041	2.20345	2.00777	1.83292
2.46	1.90553	2.2041	1.99748	1.83476
2.47	1.91404	2.2092	2.00873	1.83692
2.48	1.89834	2.20938	2.00248	1.84763
2.49	1.90333	2.19409	1.99885	1.84851
2.5	1.90202	2.1966	1.99692	1.85126
2.51	1.88307	2.20481	1.9949	1.85746
2.52	1.90529	2.19471	1.9831	1.84906
2.53	1.90053	2.20136	1.99541	1.83882
2.54	1.89647	2.20582	1.99385	1.84955
2.55	1.89224	2.19915	1.98794	1.84333
2.56	1.90013	2.19633	2.00177	1.84525
2.57	1.89514	2.19177	2.00567	1.84037
2.58	1.9078	2.1914	1.99884	1.84172
2.59	1.90021	2.19909	1.99224	1.83215
2.6	1.89831	2.19562	1.99823	1.84284
2.61	1.88879	2.19892	1.99267	1.85941
2.62	1.89359	2.18533	1.98809	1.85108
2.63	1.90264	2.19312	1.98892	1.85496
2.64	1.91577	2.20114	1.99938	1.86396
2.65	1.90711	2.19508	1.98827	1.85892
2.66	1.90771	2.19755	1.98039	1.85053
2.67	1.89925	2.19076	1.98656	1.84296
2.68	1.89651	2.19222	1.98751	1.85147
2.69	1.89833	2.19912	1.98396	1.83801
2.7	1.90229	2.20497	1.99947	1.83232
2.71	1.90804	2.20132	1.99709	1.83094
2.72	1.91172	2.21182	1.99285	1.82498
2.73	1.9071	2.21632	1.9989	1.81805
2.74	1.90726	2.2259	1.99424	1.80712
2.75	1.90896	2.21551	1.99684	1.80867
2.76	1.91172	2.22507	2.01144	1.82934
2.77	1.91654	2.21372	2.00542	1.83191
2.78	1.92552	2.22559	2.00605	1.82691
2.79	1.9121	2.22189	2.01423	1.83946
2.8	1.91962	2.21101	2.0172	1.83481
2.81	1.92718	2.21887	2.01463	1.83284
2.82	1.92155	2.21422	2.00739	1.80528
2.83	1.92445	2.22782	1.9985	1.82919
2.84	1.93908	2.22287	1.99999	1.82536
2.85	1.92693	2.21885	2.00394	1.82576
2.86	1.92495	2.21504	2.00098	1.83421
2.87	1.92522	2.23191	1.9998	1.83494
2.88	1.9203	2.2266	2.00004	1.83774
2.89	1.92625	2.22236	2.00522	1.83542
2.9	1.93276	2.22579	1.99864	1.83376
2.91	1.94322	2.22425	1.99742	1.84181
2.92	1.94393	2.22681	1.99454	1.84378
2.93	1.9271	2.23897	2.0039	1.82838
2.94	1.93706	2.24024	2.00134	1.83342
2.95	1.94243	2.23955	2.00161	1.85319
2.96	1.93508	2.23071	2.01046	1.83371
2.97	1.93418	2.23282	1.99571	1.83213
2.98	1.93864	2.21881	1.99948	1.83349
2.99	1.94187	2.21929	2.00438	1.83667
3	1.94545	2.21729	2.00242	1.83672
3.01	1.94968	2.22825	1.99837	1.82648
3.02	1.94715	2.22188	2.01197	1.82632
3.03	1.9453	2.2323	2.00348	1.82389
3.04	1.94755	2.24397	2.00052	1.83219
3.05	1.94654	2.23481	2.00344	1.83339
3.06	1.95185	2.25698	2.00935	1.8383
3.07	1.95368	2.26107	2.00423	1.83002
3.08	1.95342	2.26083	1.9998	1.83168
3.09	1.93802	2.25782	1.99448	1.83871
3.1	1.9418	2.23801	1.9992	1.82889
3.11	1.93357	2.25018	2.00189	1.82449
3.12	1.93273	2.24518	2.0015	1.83213
3.13	1.93581	2.25711	1.99688	1.82925
3.14	1.914	2.26342	1.99736	1.83697
3.15	1.92484	2.25927	1.99389	1.82065
3.16	1.94072	2.27184	2.00382	1.81484
3.17	1.92895	2.27469	2.00472	1.82744
3.18	1.92662	2.28049	2.00301	1.84088
3.19	1.92691	2.28028	2.01488	1.84165
3.2	1.93556	2.27323	2.00975	1.85104
3.21	1.93269	2.26395	2.00684	1.85188
3.22	1.93871	2.27695	2.00619	1.86189
3.23	1.92086	2.28205	2.00785	1.85961
3.24	1.93319	2.2733	2.00937	1.86183
3.25	1.93805	2.27132	2.01082	1.85521
3.26	1.9372	2.2907	1.9918	1.86517
3.27	1.92994	2.29621	1.99344	1.86454
3.28	1.935	2.29045	1.99357	1.87219
3.29	1.93172	2.28227	1.99923	1.85499
3.3	1.94229	2.27575	2.01172	1.87776
3.31	1.94471	2.29417	2.00708	1.87855
3.32	1.93731	2.30492	2.0073	1.87878
3.33	1.93124	2.31287	2.02054	1.87617
3.34	1.9434	2.30707	2.01142	1.87882
3.35	1.93715	2.29158	2.01249	1.88252
3.36	1.94336	2.30961	2.00473	1.86948
3.37	1.94404	2.30872	2.01031	1.85791
3.38	1.94272	2.31974	2.01862	1.83998
3.39	1.94518	2.29268	2.01721	1.84226
3.4	1.94188	2.29098	2.01829	1.84944
3.41	1.95511	2.2988	2.01774	1.8481
3.42	1.9497	2.3108	2.02216	1.84597
3.43	1.95018	2.31454	2.02343	1.84201
3.44	1.9607	2.31118	2.01623	1.84818
3.45	1.94953	2.31971	2.01344	1.85128
3.46	1.94312	2.31	2.0074	1.86363
3.47	1.94455	2.30856	2.01481	1.86672
3.48	1.94847	2.31539	2.01993	1.8609
3.49	1.95315	2.30831	2.02898	1.86297
3.5	1.94874	2.31559	2.01925	1.86136
3.51	1.94214	2.31	2.02341	1.83772
3.52	1.93794	2.29673	2.01678	1.85717
3.53	1.94903	2.28383	2.03153	1.85529
3.54	1.94845	2.29332	2.03246	1.85279
3.55	1.94317	2.27366	2.024	1.86635
3.56	1.93355	2.28702	2.02151	1.87845
3.57	1.93627	2.26502	2.01242	1.86614
3.58	1.93478	2.26147	2.01285	1.86904
3.59	1.93986	2.27078	2.02074	1.85971
3.6	1.93704	2.27906	2.02215	1.85528
3.61	1.92456	2.27872	2.02237	1.86702
3.62	1.95334	2.28579	2.01762	1.85209
3.63	1.94111	2.28634	2.00866	1.84792
3.64	1.95057	2.29147	2.01384	1.86152
3.65	1.94818	2.28726	2.02416	1.86361
3.66	1.94667	2.28163	2.02615	1.87408
3.67	1.92725	2.27947	2.01911	1.87051
3.68	1.93397	2.29755	2.01887	1.86689
3.69	1.92505	2.31119	2.01608	1.8666
3.7	1.92907	2.30063	2.01924	1.86801
3.71	1.93738	2.29312	2.02023	1.86706
3.72	1.9475	2.29262	2.01518	1.84561
3.73	1.95009	2.28272	2.01293	1.84392
3.74	1.94744	2.29311	2.01382	1.85722
3.75	1.92465	2.29121	2.0127	1.86885
3.76	1.93474	2.29161	2.01149	1.86545
3.77	1.91849	2.29071	2.01273	1.84683
3.78	1.92002	2.26909	2.01526	1.84186
3.79	1.92266	2.28433	2.02708	1.8362
3.8	1.92195	2.29046	2.01355	1.82918
3.81	1.92097	2.27896	2.01575	1.84057
3.82	1.92134	2.28998	1.99843	1.8566
3.83	1.91969	2.28591	2.01112	1.84015
3.84	1.91555	2.28938	2.00239	1.85305
3.85	1.90534	2.27157	1.99427	1.84703
3.86	1.91924	2.28194	1.9929	1.84657
3.87	1.91688	2.28502	1.99492	1.85589
3.88	1.92372	2.27362	1.99235	1.85059
3.89	1.92132	2.26529	1.99493	1.86057
3.9	1.92508	2.28491	2.00034	1.86843
3.91	1.9205	2.2828	2.00091	1.89222
3.92	1.92473	2.27894	2.00423	1.87394
3.93	1.91947	2.28114	2.00404	1.87432
3.94	1.91553	2.27685	2.00487	1.8751
3.95	1.92378	2.24666	2.00404	1.88214
3.96	1.91094	2.24771	2.00725	1.89024
3.97	1.91293	2.22859	2.00813	1.88659
3.98	1.9248	2.24158	2.01022	1.88342
3.99	1.91926	2.23802	2.00797	1.88275
4	1.91875	2.22894	2.00421	1.88556
4.01	1.92754	2.2128	2.00209	1.87791
4.02	1.92866	2.22894	2.01539	1.87405
4.03	1.92803	2.23245	2.00653	1.87419
4.04	1.92644	2.21481	2.00524	1.87918
4.05	1.9279	2.23658	2.01472	1.87162
4.06	1.92302	2.23614	2.00961	1.87899
4.07	1.9229	2.22242	2.02005	1.88368
4.08	1.93023	2.21776	2.01849	1.88611
4.09	1.92267	2.22091	2.02219	1.90188
4.1	1.93327	2.21905	2.02684	1.8816
4.11	1.91924	2.21391	2.02169	1.88625
4.12	1.91793	2.21422	2.01858	1.89382
4.13	1.91062	2.20636	2.01484	1.89409
4.14	1.92563	2.20387	2.02419	1.89183
4.15	1.92732	2.2089	2.01872	1.89206
4.16	1.93066	2.22481	2.0116	1.89682
4.17	1.93672	2.2343	2.01433	1.89546
4.18	1.93417	2.23042	2.01295	1.8709
4.19	1.94287	2.22515	2.01032	1.8824
4.2	1.94035	2.23198	2.0077	1.86582
4.21	1.94464	2.23423	2.01399	1.87014
4.22	1.94398	2.23219	2.01098	1.86622
4.23	1.95299	2.22734	2.01515	1.86283
4.24	1.95531	2.23368	2.01434	1.86936
4.25	1.95263	2.21624	2.01831	1.89135
4.26	1.95459	2.21726	2.01299	1.89103
4.27	1.94122	2.21834	2.01347	1.8835
4.28	1.94615	2.19675	2.01207	1.86897
4.29	1.94838	2.21136	2.0252	1.88756
4.3	1.96011	2.21869	2.00705	1.8871
4.31	1.9486	2.2218	2.01449	1.89289
4.32	1.94688	2.22581	2.00191	1.87296
4.33	1.95257	2.24695	1.99999	1.86853
4.34	1.95052	2.24492	2.01521	1.87003
4.35	1.95327	2.23319	2.01039	1.87856
4.36	1.93973	2.2367	2.01329	1.88022
4.37	1.94603	2.23089	2.00566	1.87118
4.38	1.94877	2.22939	2.01118	1.86885
4.39	1.94129	2.23457	2.00853	1.88414
4.4	1.93096	2.21453	2.00376	1.87797
4.41	1.93401	2.2289	2.00675	1.88941
4.42	1.94379	2.22544	2.00541	1.89033
4.43	1.95061	2.22949	2.00446	1.88149
4.44	1.94387	2.20664	1.99282	1.89617
4.45	1.94478	2.22586	1.99232	1.90332
4.46	1.95174	2.22374	1.99003	1.8846
4.47	1.94298	2.21781	1.99643	1.87639
4.48	1.93817	2.23263	1.98718	1.88804
4.49	1.94246	2.22498	1.991	1.87624
4.5	1.9346	2.22726	2.00118	1.87847
4.51	1.92846	2.23237	1.99692	1.89358
4.52	1.94294	2.23084	2.00635	1.88264
4.53	1.94895	2.21085	2.0015	1.86994
4.54	1.95332	2.20769	1.99768	1.86411
4.55	1.94597	2.22076	2.00735	1.86671
4.56	1.94862	2.2264	1.9935	1.86339
4.57	1.94609	2.2307	1.98204	1.86805
4.58	1.94242	2.21533	1.98138	1.85669
4.59	1.94684	2.20604	1.9837	1.85976
4.6	1.94311	2.22145	1.98504	1.85102
4.61	1.9463	2.22659	1.9858	1.84856
4.62	1.95681	2.2292	1.99278	1.8304
4.63	1.96109	2.22273	2.00115	1.83389
4.64	1.9478	2.22894	1.99261	1.83056
4.65	1.9582	2.22124	1.98872	1.83567
4.66	1.96703	2.22206	1.98408	1.82431
4.67	1.96426	2.20589	1.99176	1.82717
4.68	1.95815	2.22094	1.99374	1.82804
4.69	1.95405	2.21558	1.98812	1.83886
4.7	1.95639	2.20342	1.9898	1.83176
4.71	1.95688	2.22675	1.98195	1.82318
4.72	1.9553	2.22452	1.97449	1.82616
4.73	1.94336	2.22287	1.98562	1.82813
4.74	1.95755	2.21889	1.99184	1.82024
4.75	1.95321	2.21611	1.98124	1.82509
4.76	1.96832	2.20663	1.97424	1.83198
4.77	1.95968	2.21075	1.98183	1.85179
4.78	1.95718	2.21321	1.97614	1.85062
4.79	1.95792	2.21623	1.97937	1.85307
4.8	1.9468	2.21314	1.98506	1.86022
4.81	1.95518	2.23139	1.98468	1.86181
4.82	1.94864	2.21068	1.98509	1.86936
4.83	1.95959	2.21455	1.9856	1.86228
4.84	1.96356	2.21766	1.97394	1.8785
4.85	1.95562	2.21866	1.99434	1.89559
4.86	1.96336	2.22282	1.98487	1.89342
4.87	1.95566	2.23237	1.9824	1.88672
4.88	1.95261	2.24004	1.98119	1.88219
4.89	1.94934	2.2226	1.99715	1.89494
4.9	1.94585	2.22443	1.98033	1.90113
4.91	1.94308	2.21618	1.99333	1.91318
4.92	1.94044	2.20934	1.99116	1.90409
4.93	1.94347	2.20544	1.99504	1.9016
4.94	1.92926	2.19929	1.99204	1.90298
4.95	1.93948	2.20109	1.99611	1.9019
4.96	1.92993	2.207	1.99802	1.88973
4.97	1.92448	2.19513	1.99242	1.90537
4.98	1.94533	2.18386	1.99513	1.90096
4.99	1.94619	2.17976	1.99769	1.90877
5	1.95226	2.16841	2.00131	1.90537
5.01	1.93228	2.17221	1.98364	1.90822
5.02	1.94284	2.18043	1.99233	1.90959
5.03	1.95903	2.18809	1.98888	1.92673
5.04	1.95442	2.18469	1.98799	1.91922
5.05	1.94685	2.19663	1.9875	1.92353
5.06	1.94143	2.20289	1.98023	1.91506
5.07	1.93222	2.21068	1.98259	1.93969
5.08	1.94879	2.20891	1.98557	1.93443
5.09	1.95427	2.21584	1.97607	1.93906
5.1	1.95211	2.20824	1.97538	1.94084
5.11	1.96336	2.21425	1.97726	1.9425
5.12	1.95237	2.2229	1.99779	1.94893
5.13	1.95147	2.21192	1.99211	1.94651
5.14	1.96515	2.20884	1.98994	1.93436
5.15	1.96271	2.20959	1.99691	1.93218
5.16	1.96498	2.2186	1.99995	1.94644
5.17	1.97153	2.21333	1.98714	1.93884
5.18	1.97383	2.20448	1.97631	1.95824
5.19	1.96724	2.21575	1.98205	1.95132
5.2	1.97259	2.21	1.98122	1.95145
5.21	1.97992	2.21955	1.97478	1.94942
5.22	1.98921	2.21856	1.97475	1.93785
5.23	1.98164	2.21978	1.97017	1.95599
5.24	1.98843	2.2264	1.98305	1.95788
5.25	1.98714	2.22392	1.97976	1.96264
5.26	1.97519	2.23925	1.97582	1.94936
5.27	1.97443	2.24709	1.97029	1.93261
5.28	1.95927	2.24705	1.96444	1.93004
5.29	1.96668	2.24388	1.96919	1.93258
5.3	1.97351	2.24048	1.96861	1.92743
5.31	1.9693	2.25157	1.9641	1.91167
5.32	1.96678	2.25511	1.96753	1.90332
5.33	1.96781	2.26046	1.9722	1.89043
5.34	1.96727	2.24919	1.97375	1.89329
5.35	1.97397	2.25395	1.97365	1.87297
5.36	1.95385	2.26052	1.97612	1.87173
5.37	1.97342	2.25543	1.97172	1.86072
5.38	1.96743	2.26203	1.97374	1.86019
5.39	1.9577	2.24102	1.96551	1.85208
5.4	1.96307	2.25726	1.96117	1.85137
5.41	1.97333	2.25144	1.96136	1.85927
5.42	1.96698	2.25789	1.96923	1.84964
5.43	1.97413	2.25982	1.97034	1.85848
5.44	1.96618	2.25848	1.97658	1.86341
5.45	1.96204	2.29097	1.98976	1.86555
5.46	1.97899	2.28077	1.98501	1.86291
5.47	1.97918	2.2818	1.98936	1.85945
5.48	1.96702	2.26619	1.97921	1.854
5.49	1.97281	2.26278	1.98067	1.87053
5.5	1.96069	2.26652	1.97801	1.88028
5.51	1.96081	2.25842	1.96466	1.87243
5.52	1.9639	2.25351	1.95509	1.88175
5.53	1.96209	2.24935	1.96763	1.88451
5.54	1.98025	2.24781	1.96957	1.89067
5.55	1.97465	2.2631	1.97675	1.89198
5.56	1.96743	2.25284	1.97453	1.90532
5.57	1.9646	2.2395	1.9886	1.90516
5.58	1.9642	2.2394	1.97736	1.89956
5.59	1.96976	2.24489	1.97704	1.90662
5.6	1.96948	2.24752	1.98225	1.92119
5.61	1.97184	2.22809	1.96981	1.91516
5.62	1.96589	2.23269	1.95725	1.91382
5.63	1.95999	2.24247	1.96888	1.92204
5.64	1.97468	2.22477	1.96923	1.91349
5.65	1.96794	2.23048	1.97305	1.90188
5.66	1.96439	2.23469	1.96289	1.91008
5.67	1.95168	2.24701	1.97622	1.91449
5.68	1.94716	2.24134	1.96998	1.91355
5.69	1.95694	2.24568	1.97236	1.90827
5.7	1.94173	2.24749	1.96654	1.91811
5.71	1.94284	2.24219	1.97149	1.93096
5.72	1.9452	2.2555	1.97235	1.92678
5.73	1.94991	2.25773	1.97052	1.93567
5.74	1.9458	2.24879	1.97526	1.93963
5.75	1.94979	2.24578	1.98496	1.93835
5.76	1.9477	2.25444	1.97943	1.92665
5.77	1.94401	2.25506	1.98401	1.94328
5.78	1.94936	2.24068	1.98788	1.93749
5.79	1.95524	2.25177	1.98027	1.94167
5.8	1.96202	2.25474	1.98037	1.92393
5.81	1.96249	2.25499	1.9838	1.93492
5.82	1.94962	2.26908	1.98276	1.9324
5.83	1.95479	2.26727	1.97736	1.92434
5.84	1.96536	2.26358	1.97624	1.92747
5.85	1.94019	2.25961	1.97859	1.93454
5.86	1.96075	2.26773	1.97451	1.93932
5.87	1.95705	2.26747	1.9684	1.94893
5.88	1.95195	2.27607	1.97673	1.94717
5.89	1.952	2.26208	1.97953	1.94985
5.9	1.95369	2.26756	1.97688	1.94244
5.91	1.95783	2.26078	1.97326	1.9356
5.92	1.95452	2.2561	1.99194	1.93084
5.93	1.95176	2.25972	1.99085	1.94839
5.94	1.94917	2.2594	1.99391	1.95345
5.95	1.94789	2.27633	1.98993	1.94959
5.96	1.95167	2.28365	1.97836	1.96064
5.97	1.94391	2.27921	1.9779	1.94658
5.98	1.96317	2.27765	1.97545	1.94345
5.99	1.96656	2.2937	1.97236	1.93605
6	1.95361	2.29087	1.98226	1.94639
6.01	1.95837	2.28453	1.97628	1.94431
6.02	1.95985	2.30541	1.97447	1.93951
6.03	1.95877	2.29948	1.98001	1.93603
6.04	1.9476	2.30314	1.98046	1.94475
6.05	1.9533	2.31711	1.97469	1.94476
6.06	1.95389	2.29269	1.98222	1.9501
6.07	1.95286	2.30248	1.97094	1.94702
6.08	1.95908	2.30429	1.95659	1.94356
6.09	1.95816	2.2842	1.96357	1.95844
6.1	1.96826	2.29703	1.95373	1.94901
6.11	1.96848	2.3064	1.94974	1.9417
6.12	1.95608	2.31647	1.9521	1.9321
6.13	1.96066	2.30106	1.95087	1.92674
6.14	1.97348	2.2945	1.95337	1.9086
6.15	1.96593	2.29283	1.96612	1.91352
6.16	1.97132	2.29475	1.96202	1.90385
6.17	1.96122	2.28745	1.95846	1.89905
6.18	1.96034	2.29428	1.95754	1.9087
6.19	1.97032	2.29737	1.95732	1.90448
6.2	1.95995	2.30303	1.96163	1.89661
6.21	1.97571	2.30195	1.97034	1.89024
6.22	1.97597	2.29315	1.96601	1.89875
6.23	1.9706	2.30387	1.96311	1.89213
6.24	1.97286	2.30293	1.95773	1.89451
6.25	1.97454	2.30231	1.95621	1.90594
6.26	1.98677	2.2799	1.96626	1.8979
6.27	1.99062	2.27967	1.96716	1.90628
6.28	1.97135	2.2665	1.97328	1.89331
6.29	1.97275	2.27418	1.97225	1.89082
6.3	1.96803	2.26872	1.97463	1.89372
6.31	1.98446	2.28034	1.97479	1.90449
6.32	1.98542	2.27584	1.96849	1.89477
6.33	1.98101	2.26518	1.96885	1.90274
6.34	1.98277	2.2475	1.96177	1.91005
6.35	1.98429	2.2502	1.95899	1.90968
6.36	1.97759	2.2344	1.96054	1.90711
6.37	1.98443	2.24934	1.95506	1.91499
6.38	1.98245	2.24142	1.94545	1.91441
6.39	1.98374	2.24666	1.9509	1.8953
6.4	1.97517	2.25001	1.94729	1.87511
6.41	1.96723	2.23664	1.94856	1.88265
6.42	1.97834	2.24639	1.95238	1.89675
6.43	1.96791	2.23866	1.94206	1.89683
6.44	1.96774	2.23302	1.94942	1.89267
6.45	1.95771	2.2342	1.94423	1.88139
6.46	1.9668	2.24311	1.94974	1.86668
6.47	1.97082	2.24801	1.94654	1.87584
6.48	1.96215	2.25481	1.95319	1.89447
6.49	1.95802	2.25472	1.95129	1.89336
6.5	1.95552	2.25506	1.943	1.89695
6.51	1.95757	2.25452	1.95106	1.91419
6.52	1.96187	2.27115	1.95278	1.90361
6.53	1.95273	2.26424	1.95415	1.91336
6.54	1.96581	2.26182	1.964	1.91728
6.55	1.96613	2.25497	1.95805	1.92669
6.56	1.96731	2.26896	1.9472	1.92434
6.57	1.95817	2.25021	1.95521	1.91235
6.58	1.96631	2.26285	1.95285	1.91045
6.59	1.97041	2.25867	1.94587	1.92276
6.6	1.9574	2.26021	1.93867	1.93239
6.61	1.96423	2.25599	1.94426	1.93618
6.62	1.96696	2.26266	1.95122	1.93575
6.63	1.9586	2.27009	1.96327	1.9393
6.64	1.95439	2.2455	1.95456	1.93532
6.65	1.94383	2.25749	1.94833	1.93887
6.66	1.945	2.24503	1.94678	1.94102
6.67	1.94715	2.25645	1.94917	1.93753
6.68	1.95524	2.24621	1.95574	1.93995
6.69	1.94567	2.24931	1.95264	1.93334
6.7	1.93851	2.26749	1.94811	1.94194
6.71	1.94798	2.25413	1.95025	1.9381
6.72	1.95413	2.26939	1.94693	1.91207
6.73	1.93448	2.26681	1.94546	1.9257
6.74	1.93321	2.27791	1.95216	1.91815
6.75	1.93484	2.27956	1.94687	1.91384
6.76	1.93751	2.28213	1.95282	1.92132
6.77	1.94207	2.29697	1.96234	1.93063
6.78	1.94276	2.29295	1.97051	1.93779
6.79	1.94582	2.29176	1.95671	1.95055
6.8	1.94225	2.29566	1.9609	1.95147
6.81	1.94806	2.27874	1.9615	1.96035
6.82	1.93864	2.28832	1.96901	1.96061
6.83	1.96652	2.28975	1.96387	1.94687
6.84	1.9469	2.27194	1.97166	1.96331
6.85	1.94656	2.28764	1.97711	1.95297
6.86	1.95103	2.29974	1.96794	1.96158
6.87	1.95592	2.28858	1.96521	1.95757
6.88	1.94524	2.27097	1.96756	1.95107
6.89	1.9393	2.28447	1.95789	1.96314
6.9	1.9486	2.27857	1.95728	1.95108
6.91	1.96773	2.28853	1.96978	1.95075
6.92	1.96111	2.29918	1.97102	1.95636
6.93	1.96483	2.30625	1.96474	1.94158
6.94	1.96189	2.30819	1.96836	1.95597
6.95	1.97316	2.30723	1.9652	1.94302
6.96	1.97181	2.29781	1.96076	1.96245
6.97	1.96174	2.29148	1.98391	1.97603
6.98	1.97073	2.28875	1.97566	1.97355
6.99	1.96308	2.27855	1.97478	1.97232
7	1.97119	2.27721	1.97521	1.95922
7.01	1.95781	2.27609	1.98285	1.96531
7.02	1.95456	2.26475	1.96712	1.98212
7.03	1.95571	2.27268	1.97147	1.98923
7.04	1.94949	2.28384	1.97635	1.98038
7.05	1.95649	2.28253	1.97253	1.98425
7.06	1.94309	2.28518	1.97604	2.00242
7.07	1.95084	2.27402	1.97946	2.00213
7.08	1.95933	2.28503	1.97194	1.99556
7.09	1.95459	2.28088	1.96521	2.00338
7.1	1.95618	2.28719	1.96673	1.99726
7.11	1.95538	2.28991	1.96643	1.99094
7.12	1.94708	2.291	1.96604	1.99167
7.13	1.95702	2.28729	1.96021	1.98908
7.14	1.94959	2.2834	1.96506	1.98348
7.15	1.9417	2.27694	1.95895	1.97703
7.16	1.94281	2.28918	1.96405	1.98458
7.17	1.93317	2.27212	1.97451	1.96894
7.18	1.94232	2.24892	1.97691	1.97403
7.19	1.95848	2.2655	1.97273	1.98835
7.2	1.94534	2.26436	1.95966	1.98473
7.21	1.95449	2.26166	1.96629	2.00888
7.22	1.95746	2.25422	1.96947	2.00278
7.23	1.97056	2.25614	1.97977	1.99909
7.24	1.95814	2.24443	1.97113	2.00372
7.25	1.96791	2.25055	1.96993	2.00708
7.26	1.96772	2.24922	1.96714	2.00751
7.27	1.95764	2.25242	1.96556	2.02362
7.28	1.96139	2.25063	1.96774	2.0466
7.29	1.96154	2.25487	1.97282	2.05528
7.3	1.95636	2.25652	1.97049	2.04078
7.31	1.9533	2.25518	1.97189	2.0484
7.32	1.95217	2.26926	1.9753	2.05125
7.33	1.96153	2.26171	1.96515	2.02512
7.34	1.95574	2.26716	1.96988	2.01727
7.35	1.96023	2.27491	1.97021	2.03741
7.36	1.96678	2.29288	1.96704	2.03037
7.37	1.98359	2.28182	1.96617	2.03144
7.38	1.98323	2.27446	1.96086	2.03278
7.39	1.99178	2.27608	1.95969	2.02638
7.4	1.97893	2.28171	1.96643	2.04426
7.41	1.97431	2.29529	1.96539	2.04542
7.42	1.97265	2.27691	1.97645	2.05018
7.43	1.98484	2.29058	1.98381	2.05258
7.44	1.99077	2.27776	1.98213	2.04487
7.45	1.98791	2.28423	1.98018	2.05998
7.46	1.97533	2.27337	1.97389	2.05504
7.47	1.96157	2.27079	1.98	2.05446
7.48	1.9722	2.26644	1.97566	2.05738
7.49	1.98356	2.26806	1.97965	2.06161
7.5	1.97872	2.27221	1.98146	2.05084
7.51	1.97106	2.261	1.98334	2.04482
7.52	1.96167	2.25946	1.982	2.03233
7.53	1.95681	2.24293	1.98924	2.03431
7.54	1.96305	2.22984	1.98746	2.02931
7.55	1.95957	2.2297	1.98963	2.0201
7.56	1.95767	2.23687	1.99168	2.02154
7.57	1.96168	2.23307	1.99425	2.01423
7.58	1.96434	2.24451	1.99856	2.02099
7.59	1.96019	2.27132	1.99626	2.01195
7.6	1.9588	2.27476	2.00815	1.99908
7.61	1.96403	2.26588	2.00174	1.99849
7.62	1.94853	2.28142	1.99053	2.00826
7.63	1.94764	2.26743	2.00769	2.00239
7.64	1.94872	2.27439	2.00628	2.00924
7.65	1.94931	2.26546	1.9971	2.00206
7.66	1.94048	2.26165	1.99645	2.01105
7.67	1.95006	2.26393	1.9901	1.99982
7.68	1.94695	2.28209	1.99762	2.00769
7.69	1.9604	2.27795	1.9994	1.99143
7.7	1.96005	2.27625	1.99495	1.98986
7.71	1.95463	2.29628	1.99164	1.98737
7.72	1.9562	2.28973	1.99325	1.97621
7.73	1.96164	2.26759	1.99066	1.97484
7.74	1.9485	2.27489	1.98549	1.9888
7.75	1.95392	2.27436	1.9885	1.99442
7.76	1.94649	2.27438	1.9992	1.98981
7.77	1.96002	2.27867	2.00618	1.97726
7.78	1.95411	2.27196	2.00723	1.96957
7.79	1.95939	2.2721	2.00493	1.96884
7.8	1.97025	2.25544	1.99885	1.96293
7.81	1.96478	2.25835	2.01196	1.96441
7.82	1.97083	2.26091	1.99243	1.96444
7.83	1.96163	2.26052	1.99534	1.97165
7.84	1.95781	2.25915	1.99527	1.98069
7.85	1.95086	2.25654	1.99289	1.98722
7.86	1.96124	2.25316	1.99973	1.98022
7.87	1.95707	2.25101	2.00717	1.97137
7.88	1.96021	2.23063	2.01043	1.98692
7.89	1.95624	2.23497	1.98773	1.9847
7.9	1.95572	2.23874	1.97703	1.98332
7.91	1.9597	2.23324	1.98582	1.97755
7.92	1.96817	2.23253	1.98496	1.9806
7.93	1.9617	2.23487	1.98695	1.98249
7.94	1.95621	2.2384	1.98378	1.99294
7.95	1.97177	2.23825	1.97998	1.98502
7.96	1.96318	2.23414	1.97748	1.96706
7.97	1.95673	2.23246	1.96783	1.97058
7.98	1.94789	2.24101	1.95963	1.9685
7.99	1.94609	2.25425	1.96449	1.96111
8	1.93831	2.23831	1.97907	1.95942
8.01	1.93916	2.24812	1.96971	1.95661
8.02	1.94639	2.26692	1.97748	1.96441
8.03	1.94656	2.25002	1.97643	1.96234
8.04	1.95302	2.24673	1.97132	1.96077
8.05	1.96349	2.24401	1.96247	1.96943
8.06	1.96683	2.2446	1.96646	1.96814
8.07	1.96408	2.25521	1.96187	1.96443
8.08	1.96021	2.23983	1.97125	1.97701
8.09	1.97154	2.24112	1.95937	1.96614
8.1	1.97265	2.24329	1.95944	1.9736
8.11	1.973	2.24756	1.97226	1.98323
8.12	1.97401	2.22855	1.9702	1.99129
8.13	1.96711	2.22666	1.97243	1.98392
8.14	1.96238	2.22009	1.96927	1.97691
8.15	1.97356	2.22768	1.95568	1.96684
8.16	1.97184	2.22503	1.9693	1.95666
8.17	1.97041	2.22019	1.97247	1.95104
8.18	1.9745	2.22075	1.97449	1.95783
8.19	1.98725	2.21219	1.9776	1.95178
8.2	1.98945	2.21971	1.98581	1.94062
8.21	1.9853	2.2321	1.98447	1.92821
8.22	1.98513	2.23271	1.97369	1.93397
8.23	1.97077	2.23741	1.98996	1.91896
8.24	1.97295	2.23734	1.98575	1.90315
8.25	1.97699	2.24231	1.98101	1.87842
8.26	1.97681	2.23843	1.97414	1.8652
8.27	1.98517	2.23682	1.97236	1.86685
8.28	2.00167	2.23438	1.97247	1.86258
8.29	1.99755	2.24317	1.97078	1.85578
8.3	1.99451	2.25522	1.96971	1.8496
8.31	1.98632	2.23623	1.97737	1.83566
8.32	1.98735	2.23533	1.97503	1.82516
8.33	1.98162	2.23736	1.97525	1.81261
8.34	1.98283	2.21336	1.97316	1.82207
8.35	1.98999	2.22917	1.9732	1.818
8.36	1.99199	2.22024	1.96342	1.81053
8.37	1.99153	2.23074	1.96291	1.80955
8.38	2.00518	2.24621	1.96523	1.8219
8.39	2.00771	2.22424	1.96811	1.81116
8.4	1.9893	2.23765	1.97125	1.81703
8.41	1.99428	2.23871	1.98096	1.81852
8.42	1.99092	2.23407	1.96933	1.81337
8.43	1.98095	2.2246	1.96749	1.81162
8.44	1.98796	2.23908	1.9661	1.80682
8.45	1.99261	2.22247	1.96902	1.82457
8.46	1.99296	2.21363	1.97327	1.81755
8.47	1.99035	2.21356	1.96584	1.8094
8.48	1.98801	2.21422	1.96197	1.81661
8.49	1.9801	2.20251	1.96048	1.81932
8.5	1.98253	2.19555	1.96727	1.81448
8.51	1.98018	2.20278	1.96295	1.818
8.52	1.97642	2.20877	1.95881	1.8043
8.53	1.9894	2.22092	1.96967	1.79652
8.54	1.99578	2.20878	1.97309	1.8152
8.55	1.99184	2.20637	1.96648	1.82694
8.56	1.97994	2.20617	1.95288	1.82133
8.57	1.98635	2.21628	1.97161	1.81217
8.58	1.99005	2.21907	1.9707	1.81187
8.59	2.00863	2.19887	1.96246	1.82073
8.6	2.00752	2.20671	1.95498	1.82452
8.61	1.99437	2.2003	1.97161	1.82827
8.62	1.98554	2.20532	1.96107	1.84132
8.63	1.99092	2.20328	1.96184	1.83763
8.64	1.9863	2.20471	1.97396	1.84461
8.65	1.97991	2.19959	1.97914	1.83609
8.66	1.98012	2.19347	1.97824	1.84102
8.67	1.9895	2.19497	1.97735	1.83992
8.68	1.98605	2.19862	1.98185	1.84303
8.69	1.98598	2.19372	1.98663	1.84009
8.7	1.98372	2.19206	1.98338	1.83256
8.71	1.98469	2.19115	1.97396	1.84574
8.72	1.98123	2.17817	1.97448	1.83697
8.73	1.97982	2.17612	1.96811	1.83944
8.74	1.97268	2.19171	1.97334	1.8455
8.75	1.98065	2.19669	1.98686	1.82514
8.76	1.97218	2.19615	1.96773	1.81038
8.77	1.99028	2.20294	1.97668	1.82213
8.78	1.96932	2.19446	1.98529	1.82293
8.79	1.98734	2.1925	1.96671	1.84423
8.8	1.97688	2.20982	1.97158	1.84289
8.81	1.96255	2.20411	1.95745	1.83275
8.82	1.97108	2.20557	1.95862	1.82976
8.83	1.98282	2.19492	1.95944	1.8385
8.84	1.97585	2.1862	1.97423	1.82261
8.85	1.98128	2.17023	1.97656	1.8174
8.86	1.97501	2.17117	1.9716	1.81509
8.87	1.96922	2.15844	1.96692	1.82993
8.88	1.97016	2.16086	1.96825	1.83058
8.89	1.973	2.16568	1.97833	1.83899
8.9	1.98176	2.16776	1.98874	1.83222
8.91	1.97534	2.16054	1.9933	1.82524
8.92	1.9809	2.15723	1.97577	1.82574
8.93	1.98233	2.16699	1.97506	1.8146
8.94	1.97709	2.16195	1.98726	1.81927
8.95	1.97972	2.15945	1.98218	1.82901
8.96	1.98129	2.154	1.98242	1.81474
8.97	1.97917	2.14111	1.98253	1.80704
8.98	1.97876	2.15897	1.97825	1.79201
8.99	1.99308	2.15302	1.97984	1.78655
9	1.98635	2.14615	1.98142	1.7773
9.01	1.99705	2.14755	1.97876	1.78516
9.02	1.99727	2.15881	1.97011	1.78235
9.03	1.99424	2.17253	1.97846	1.78943
9.04	1.98887	2.14374	1.98447	1.79002
9.05	1.99183	2.14804	1.98838	1.79695
9.06	1.9873	2.14966	1.98482	1.79281
9.07	1.98238	2.14594	1.98732	1.79799
9.08	1.98782	2.15613	1.98775	1.80347
9.09	1.97233	2.15103	1.98077	1.79662
9.1	1.9889	2.1574	1.98908	1.8014
9.11	1.97082	2.15975	1.97929	1.80585
9.12	1.99187	2.16254	1.9796	1.80492
9.13	1.98802	2.15582	1.98577	1.81245
9.14	1.98893	2.17099	1.98868	1.81088
9.15	1.9873	2.17713	1.98908	1.81396
9.16	1.99744	2.1896	1.99727	1.8095
9.17	1.99398	2.19496	1.99247	1.80704
9.18	2.00583	2.2029	1.99985	1.81868
9.19	2.0037	2.20708	1.98205	1.80863
9.2	1.98906	2.19909	1.97586	1.8254
9.21	1.98929	2.19667	1.97221	1.81244
9.22	2.00071	2.18858	1.98496	1.81682
9.23	1.99995	2.1894	1.99396	1.81885
9.24	2.00365	2.18747	1.98881	1.81183
9.25	2.0069	2.19121	1.99064	1.81238
9.26	1.99266	2.18196	1.99042	1.82222
9.27	1.99661	2.1808	1.98552	1.82334
9.28	1.99349	2.17953	1.98822	1.82893
9.29	2.0085	2.18331	1.98288	1.81728
9.3	2.00528	2.1762	1.97617	1.83189
9.31	2.00336	2.18854	1.9838	1.82213
9.32	2.00298	2.16916	1.98864	1.83047
9.33	2.00888	2.18019	1.97722	1.84798
9.34	2.01003	2.16813	1.9768	1.82586
9.35	1.99855	2.17868	1.96583	1.83643
9.36	1.98958	2.20493	1.96747	1.81864
9.37	1.9881	2.20108	1.98216	1.81196
9.38	1.99481	2.215	1.98226	1.8156
9.39	1.98743	2.21967	1.97653	1.82116
9.4	1.98177	2.2407	1.97451	1.81794
9.41	2.00027	2.25648	1.97288	1.8256
9.42	1.99189	2.24996	1.99735	1.82987
9.43	1.99162	2.25639	1.99429	1.82842
9.44	1.99887	2.24035	2.00007	1.82216
9.45	1.98286	2.24989	1.97707	1.81913
9.46	1.97596	2.24625	1.98515	1.81414
9.47	1.98396	2.24117	1.99382	1.82168
9.48	1.97991	2.2088	1.98316	1.81521
9.49	1.97703	2.23886	1.98737	1.82689
9.5	1.99326	2.22201	1.98889	1.83436
9.51	1.99758	2.22984	1.9853	1.83158
9.52	1.99408	2.23118	1.98766	1.83104
9.53	1.9851	2.21476	1.99182	1.81858
9.54	1.99079	2.21596	1.99841	1.81406
9.55	2.00341	2.20656	1.99509	1.80367
9.56	2.0063	2.18529	1.99665	1.81052
9.57	1.99768	2.19488	1.98412	1.82006
9.58	1.99387	2.20379	1.99215	1.82611
9.59	1.99544	2.21154	1.9854	1.82921
9.6	1.9931	2.22172	1.98257	1.84935
9.61	1.98321	2.2129	1.97959	1.85364
9.62	1.99527	2.21248	1.98131	1.85816
9.63	1.99458	2.21044	1.97628	1.87728
9.64	1.99168	2.20558	1.97387	1.88689
9.65	2.00617	2.19829	1.97727	1.88176
9.66	2.00214	2.20799	1.97831	1.88289
9.67	1.99813	2.20855	1.97324	1.88693
9.68	1.98761	2.20831	1.98883	1.87817
9.69	2.00732	2.20323	1.98465	1.86945
9.7	2.00447	2.20228	1.98519	1.875
9.71	1.99669	2.21586	1.98578	1.891
9.72	1.98891	2.21618	1.99431	1.88674
9.73	1.99708	2.22602	1.99231	1.8871
9.74	1.99651	2.22129	1.99694	1.88249
9.75	1.99697	2.24167	1.98759	1.88182
9.76	1.99513	2.23829	1.99681	1.87926
9.77	2.00418	2.23812	1.99538	1.88003
9.78	2.01258	2.23413	1.99169	1.88546
9.79	2.001	2.24837	1.994	1.87955
9.8	2.00682	2.24062	1.99324	1.89608
9.81	2.00738	2.25058	1.99734	1.88826
9.82	2.01199	2.25229	2.00164	1.89509
9.83	2.0093	2.26779	1.99208	1.90585
9.84	1.99465	2.25875	2.00722	1.90259
9.85	2.00165	2.27609	1.99284	1.90557
9.86	1.99891	2.27654	1.98866	1.90519
9.87	1.98834	2.28106	1.98858	1.90033
9.88	2.00095	2.27517	1.9932	1.90201
9.89	2.0037	2.26976	1.98716	1.89555
9.9	1.99294	2.26557	1.98174	1.9127
9.91	2.00538	2.272	1.97996	1.9221
9.92	1.99887	2.27031	1.98471	1.93212
9.93	1.9945	2.27982	1.99131	1.93083
9.94	2.00552	2.27328	2.00107	1.92215
9.95	2.00513	2.29624	1.9949	1.92812
9.96	1.99291	2.30942	1.99222	1.91957
9.97	2.00232	2.30651	2.00185	1.9102
9.98	2.00799	2.3277	2.00362	1.90672
9.99	2.00327	2.32268	2.00138	1.89562
10	2.00491	2.316	1.99377	1.89411
10.01	1.99598	2.31356	1.99913	1.89267
10.02	2.00175	2.31562	2.0065	1.87685
10.03	2.00306	2.32994	1.9902	1.87628
10.04	2.00021	2.32153	2.00695	1.89089
10.05	2.00609	2.31592	1.99767	1.89159
10.06	2.00121	2.31729	2.00099	1.90575
10.07	1.99531	2.32223	2.00129	1.89711
10.08	1.99708	2.32805	1.99653	1.89795
10.09	1.99838	2.32336	1.99499	1.89576
10.1	2.00802	2.30963	1.99756	1.90026
10.11	2.00809	2.31798	2.00709	1.89541
10.12	2.00995	2.30063	2.00236	1.89511
10.13	2.0075	2.29836	1.99333	1.87861
10.14	1.99993	2.30223	1.98339	1.87352
10.15	1.99606	2.28414	1.98584	1.88436
10.16	1.99526	2.28649	1.99501	1.89033
10.17	1.99732	2.29448	1.98523	1.88013
10.18	1.99339	2.31769	1.98554	1.88902
10.19	1.98714	2.31712	1.98968	1.89603
10.2	1.98961	2.31085	1.99568	1.9029
10.21	1.989	2.3068	2.00164	1.91698
10.22	1.97916	2.29092	2.00395	1.91166
10.23	1.98082	2.30886	1.99749	1.905
10.24	1.97365	2.29262	2.00287	1.88899
10.25	1.97405	2.28828	2.00252	1.88624
10.26	1.98776	2.30314	2.00306	1.88757
10.27	1.99102	2.29198	2.00665	1.88494
10.28	1.98758	2.28057	2.01466	1.88905
10.29	1.98841	2.27024	2.00642	1.8694
10.3	1.99821	2.28461	2.00624	1.8833
10.31	2.00036	2.27835	2.00213	1.88359
10.32	1.98387	2.28988	1.99628	1.86698
10.33	1.98398	2.28174	2.00791	1.84769
10.34	1.99573	2.28952	2.01194	1.86297
10.35	1.99244	2.29972	2.01928	1.86618
10.36	2.00489	2.29451	2.02241	1.8634
10.37	2.00513	2.28416	2.01237	1.85528
10.38	1.99471	2.27806	2.02041	1.86238
10.39	1.98464	2.28684	2.00816	1.86387
10.4	1.98627	2.28482	2.00662	1.85857
10.41	1.99835	2.28134	2.01676	1.86801
10.42	1.99546	2.28783	2.01092	1.86058
10.43	1.99221	2.28663	2.01387	1.86365
10.44	1.99522	2.2924	2.00444	1.86465
10.45	2.00404	2.30902	2.01154	1.85869
10.46	1.99317	2.31064	2.01646	1.85092
10.47	2.0112	2.29317	2.00672	1.8617
10.48	2.02457	2.31114	2.01175	1.86526
10.49	2.01906	2.32116	2.02106	1.85559
10.5	2.02665	2.32453	2.00797	1.85921
10.51	2.02883	2.33455	2.00755	1.86407
10.52	2.0293	2.3305	2.01107	1.86062
10.53	2.033	2.32758	2.00827	1.85972
10.54	2.03622	2.3354	2.00446	1.8651
10.55	2.03218	2.32895	2.0052	1.87029
10.56	2.02512	2.34417	2.00899	1.86082
10.57	2.03343	2.34134	2.01357	1.85573
10.58	2.03296	2.32406	2.00581	1.85676
10.59	2.02373	2.34015	1.99955	1.86683
10.6	2.01818	2.33025	1.9983	1.84074
10.61	2.03165	2.31945	2.00178	1.83998
10.62	2.03967	2.32356	1.99381	1.83238
10.63	2.04337	2.33468	2.00679	1.83571
10.64	2.02278	2.32443	2.01234	1.82319
10.65	2.01166	2.33926	1.99603	1.82964
10.66	2.0097	2.33325	1.99475	1.82208
10.67	2.00307	2.32896	1.99601	1.83102
10.68	2.00044	2.31349	2.00486	1.85211
10.69	2.01584	2.29669	2.00129	1.86569
10.7	2.01922	2.29887	1.99177	1.86642
10.71	2.01088	2.28985	1.99305	1.86604
10.72	2.02308	2.30151	2.00439	1.86733
10.73	2.01125	2.31424	2.00376	1.87368
10.74	1.99916	2.28886	1.99622	1.86863
10.75	1.99872	2.28331	2.00793	1.86582
10.76	2.00255	2.26963	2.00211	1.8822
10.77	2.02532	2.27488	2.01596	1.90892
10.78	2.01594	2.27794	2.0134	1.91114
10.79	2.00621	2.24841	2.01723	1.90865
10.8	2.00899	2.24385	2.00917	1.90742
10.81	2.01333	2.23196	1.99867	1.91004
10.82	2.02392	2.23789	2.00592	1.90384
10.83	2.0172	2.23894	1.99997	1.88676
10.84	2.03966	2.24988	2.01256	1.88161
10.85	2.0308	2.27329	2.00763	1.89299
10.86	2.03163	2.24805	2.01965	1.88361
10.87	2.04756	2.25933	2.0124	1.88014
10.88	2.04082	2.25219	2.01649	1.88792
10.89	2.03823	2.25051	2.01141	1.90156
10.9	2.04213	2.23545	2.01431	1.89274
10.91	2.0356	2.24835	2.01634	1.8816
10.92	2.03335	2.25724	2.0136	1.89381
10.93	2.0241	2.24983	2.01174	1.8889
10.94	2.02477	2.23634	2.01513	1.88729
10.95	2.02047	2.23547	2.01268	1.8887
10.96	2.02133	2.23655	2.01446	1.8966
10.97	2.00177	2.25653	2.00648	1.90795
10.98	2.0126	2.26014	2.01591	1.88763
10.99	1.99168	2.26179	2.01271	1.89474
11	2.00347	2.27122	2.01424	1.9101
11.01	1.99695	2.25698	2.02407	1.90122
11.02	2.01226	2.23956	2.02645	1.88222
11.03	2.00404	2.26604	2.02178	1.8609
11.04	2.01802	2.27093	2.0253	1.86359
11.05	2.00419	2.2652	2.03206	1.85923
11.06	2.00224	2.25313	2.02748	1.86199
11.07	1.99999	2.25407	2.03198	1.86288
11.08	2.01377	2.25401	2.02895	1.86953
11.09	2.00275	2.2516	2.02695	1.86776
11.1	2.00782	2.25463	2.02406	1.87679
11.11	2.01088	2.25452	2.02476	1.86176
11.12	2.00022	2.25509	2.02236	1.8709
11.13	2.009	2.25724	2.03346	1.88087
11.14	2.00733	2.2611	2.03338	1.86781
11.15	2.02446	2.26385	2.02414	1.86867
11.16	2.03503	2.26048	2.01284	1.84991
11.17	2.02069	2.26811	2.0137	1.85528
11.18	2.021	2.27073	2.01798	1.85452
11.19	2.01439	2.24878	2.01827	1.83565
11.2	2.02265	2.24539	2.02494	1.8319
11.21	2.02052	2.25636	2.01295	1.82941
11.22	2.01628	2.27439	2.02208	1.8294
11.23	2.01732	2.27443	2.02437	1.82351
11.24	2.00499	2.27761	2.02587	1.82746
11.25	2.00904	2.28355	2.02629	1.82163
11.26	2.00667	2.26786	2.02563	1.81788
11.27	2.00037	2.27315	2.03957	1.8134
11.28	1.9902	2.25606	2.02691	1.80957
11.29	1.99811	2.26389	2.02856	1.81255
11.3	1.99565	2.27263	2.02714	1.80379
11.31	1.97779	2.27737	2.02304	1.807
11.32	1.9779	2.26141	2.01542	1.80452
11.33	1.98684	2.26688	2.02245	1.80003
11.34	1.98403	2.27534	2.00317	1.79921
11.35	1.97862	2.28511	2.00313	1.80662
11.36	1.9866	2.2811	2.0021	1.79889
11.37	1.99544	2.28116	2.01951	1.80428
11.38	1.9937	2.29054	2.00589	1.7972
11.39	1.97592	2.29004	2.01281	1.81266
11.4	1.98046	2.29516	2.00972	1.82555
11.41	1.98449	2.2796	2.00438	1.81078
11.42	1.99574	2.27598	2.01007	1.82151
11.43	1.9818	2.28694	2.01612	1.80578
11.44	1.98863	2.27518	2.03333	1.79593
11.45	1.98197	2.2726	2.02473	1.80243
11.46	1.99717	2.27944	2.0285	1.80065
11.47	1.98502	2.27763	2.02411	1.79674
11.48	1.99669	2.27831	2.03492	1.78919
11.49	1.98984	2.27128	2.04285	1.80375
11.5	1.97252	2.2721	2.03665	1.79134
11.51	1.96814	2.2623	2.03783	1.808
11.52	1.97356	2.25979	2.04559	1.81088
11.53	1.97734	2.24336	2.04237	1.80889
11.54	1.97424	2.26435	2.04437	1.80448
11.55	1.97995	2.25704	2.03964	1.80017
11.56	1.9784	2.26865	2.03824	1.79547
11.57	1.98565	2.26924	2.02679	1.78788
11.58	1.98061	2.27321	2.04181	1.78999
11.59	1.98648	2.28157	2.04505	1.78453
11.6	1.98638	2.27585	2.05031	1.79446
11.61	1.98679	2.26813	2.05032	1.79841
11.62	1.99091	2.27558	2.05372	1.80678
11.63	1.98238	2.27643	2.05368	1.81509
11.64	1.97363	2.27225	2.05179	1.82188
11.65	1.97656	2.26766	2.04468	1.82268
11.66	1.9713	2.28079	2.05221	1.83103
11.67	1.99218	2.28799	2.04498	1.82888
11.68	1.98369	2.27157	2.05382	1.82535
11.69	1.97046	2.27205	2.04526	1.83354
11.7	1.9699	2.28289	2.04034	1.8296
11.71	1.97548	2.28443	2.0457	1.82608
11.72	1.9788	2.29057	2.04157	1.82403
11.73	1.98507	2.28075	2.04322	1.83213
11.74	1.99668	2.28712	2.04835	1.84452
11.75	1.99414	2.28725	2.04597	1.83434
11.76	1.99244	2.28133	2.04276	1.84111
11.77	1.99179	2.29398	2.04423	1.82857
11.78	1.98614	2.29545	2.04788	1.83014
11.79	1.96752	2.29062	2.04442	1.83186
11.8	1.97875	2.28739	2.04477	1.8351
11.81	1.98882	2.26964	2.0475	1.83451
11.82	1.99497	2.28834	2.03385	1.85179
11.83	1.97529	2.27939	2.0365	1.85291
11.84	1.97861	2.28708	2.05484	1.86405
11.85	1.98882	2.28986	2.05816	1.8589
11.86	1.98376	2.30202	2.04487	1.85456
11.87	1.9762	2.2932	2.05298	1.86733
11.88	1.97678	2.27958	2.04298	1.86688
11.89	1.98431	2.29047	2.05129	1.87203
11.9	1.97508	2.2949	2.04202	1.88844
11.91	1.97254	2.30248	2.03662	1.88439
11.92	1.98097	2.31059	2.03775	1.902
11.93	1.99539	2.3143	2.04042	1.88532
11.94	1.98759	2.3214	2.03798	1.8851
11.95	1.98833	2.3223	2.04736	1.89059
11.96	1.98155	2.3288	2.05085	1.89096
11.97	1.98585	2.30859	2.04916	1.89204
11.98	1.98858	2.31051	2.05345	1.87761
11.99	1.9767	2.32196	2.05547	1.87201
12	1.99596	2.34046	2.04675	1.86519
12.01	1.98259	2.32665	2.05267	1.86262
12.02	1.96611	2.34593	2.03381	1.84849
12.03	1.96831	2.34018	2.03704	1.84511
12.04	1.96136	2.36985	2.03818	1.8526
12.05	1.96473	2.38083	2.0299	1.84139
12.06	1.96012	2.36939	2.02363	1.83682
12.07	1.9688	2.36309	2.02384	1.83344
12.08	1.95751	2.34026	2.03253	1.83966
12.09	1.94809	2.34638	2.02761	1.8269
12.1	1.94969	2.33942	2.01429	1.83877
12.11	1.95722	2.34365	2.01458	1.86136
12.12	1.95353	2.32947	2.02104	1.86395
12.13	1.95048	2.31418	2.01229	1.86595
12.14	1.95215	2.30467	2.01392	1.85581
12.15	1.94715	2.30342	2.0101	1.87102
12.16	1.94099	2.30562	2.01288	1.87172
12.17	1.95797	2.30999	2.02004	1.87674
12.18	1.9423	2.30399	2.02531	1.87855
12.19	1.95418	2.29783	2.01399	1.88586
12.2	1.94963	2.30191	2.02977	1.86486
12.21	1.94379	2.29803	2.02141	1.85655
12.22	1.94881	2.31151	2.0202	1.85757
12.23	1.9625	2.30822	2.00957	1.85107
12.24	1.95307	2.30995	2.0204	1.84318
12.25	1.96335	2.29104	2.02289	1.8501
12.26	1.94801	2.29046	2.02298	1.83085
12.27	1.94377	2.29571	2.02204	1.83951
12.28	1.94984	2.2947	2.01877	1.85354
12.29	1.93698	2.29613	2.01958	1.85925
12.3	1.94421	2.28365	2.03088	1.84233
12.31	1.94549	2.28196	2.02057	1.83812
12.32	1.9436	2.2921	2.02956	1.83536
12.33	1.94335	2.28133	2.03079	1.83191
12.34	1.95082	2.28452	2.03469	1.84914
12.35	1.95057	2.29357	2.0268	1.84597
12.36	1.93811	2.31482	2.03263	1.83933
12.37	1.93879	2.31411	2.02351	1.82788
12.38	1.93248	2.31335	2.02213	1.81844
12.39	1.92663	2.30141	2.02722	1.81198
12.4	1.93381	2.30507	2.02968	1.81156
12.41	1.92605	2.29226	2.01944	1.82909
12.42	1.94145	2.28083	2.02854	1.82327
12.43	1.93135	2.27333	2.019	1.82464
12.44	1.94487	2.2817	2.02883	1.83715
12.45	1.94063	2.28313	2.02463	1.8354
12.46	1.9583	2.27587	2.01623	1.83817
12.47	1.96763	2.26306	2.01573	1.8334
12.48	1.95898	2.25329	2.01461	1.8489
12.49	1.95872	2.26982	2.0208	1.83748
12.5	1.95584	2.25932	2.0221	1.85125
12.51	1.96708	2.27468	2.01765	1.86691
12.52	1.96071	2.2724	2.00683	1.85522
12.53	1.95657	2.28991	2.00729	1.85576
12.54	1.96686	2.27495	2.00605	1.86221
12.55	1.9619	2.2952	2.00497	1.84521
12.56	1.94791	2.30408	2.01013	1.84299
12.57	1.95268	2.29829	2.00555	1.839
12.58	1.94379	2.30107	2.00484	1.84254
12.59	1.93626	2.3071	2.01275	1.84116
12.6	1.94405	2.30348	2.00545	1.83881
12.61	1.92999	2.31475	2.01838	1.84078
12.62	1.93695	2.30847	2.01581	1.8425
12.63	1.92187	2.28528	2.015	1.84426
12.64	1.92578	2.29948	2.00787	1.834
12.65	1.9331	2.31356	2.00929	1.82578
12.66	1.93036	2.31943	2.00577	1.8247
12.67	1.929	2.31877	2.01604	1.82389
12.68	1.93061	2.31256	2.00825	1.82196
12.69	1.93054	2.30059	2.00139	1.81246
12.7	1.92763	2.30157	2.01459	1.81417
12.71	1.93221	2.31421	2.00851	1.81713
12.72	1.9263	2.31885	2.00225	1.80664
12.73	1.92718	2.3396	2.00169	1.81233
12.74	1.9266	2.31691	2.00061	1.82854
12.75	1.93557	2.30446	2.01718	1.83322
12.76	1.92663	2.31091	2.01531	1.82365
12.77	1.92357	2.30238	2.00833	1.83556
12.78	1.93603	2.30104	2.01672	1.82973
12.79	1.92539	2.29722	2.00787	1.83488
12.8	1.92512	2.29545	2.01222	1.82582
12.81	1.93554	2.30425	1.99713	1.82116
12.82	1.94133	2.32114	1.9996	1.81814
12.83	1.93904	2.31635	2.00651	1.81478
12.84	1.92381	2.31285	1.99521	1.81434
12.85	1.92379	2.33165	2.00749	1.80775
12.86	1.92906	2.32881	1.99962	1.80762
12.87	1.92276	2.3283	1.9993	1.79939
12.88	1.92704	2.33181	2.00011	1.81149
12.89	1.93595	2.34627	1.99144	1.81449
12.9	1.93242	2.32458	2.00923	1.80945
12.91	1.9298	2.33765	2.00191	1.81044
12.92	1.93243	2.34068	1.99751	1.80583
12.93	1.93349	2.33655	1.98756	1.80721
12.94	1.93084	2.33234	1.98799	1.80064
12.95	1.9276	2.3383	1.9827	1.80635
12.96	1.93173	2.34972	1.98203	1.81383
12.97	1.93651	2.32529	1.99142	1.8036
12.98	1.93528	2.31691	1.98073	1.82099
12.99	1.92829	2.31603	1.9782	1.81503
13	1.93067	2.31127	1.97227	1.80414
13.01	1.93281	2.31387	1.97855	1.79171
13.02	1.93644	2.32226	1.97894	1.7979
13.03	1.93257	2.31443	1.98668	1.78961
13.04	1.93617	2.30828	1.97974	1.78963
13.05	1.93631	2.31707	1.99131	1.78595
13.06	1.93759	2.3326	1.98522	1.78356
13.07	1.94056	2.3151	1.98458	1.78935
13.08	1.94324	2.31385	1.98534	1.78458
13.09	1.9363	2.31625	1.97603	1.79296
13.1	1.93035	2.32525	1.98579	1.79669
13.11	1.92624	2.32146	1.99251	1.79417
13.12	1.92255	2.3147	1.99097	1.79434
13.13	1.92373	2.30414	1.98534	1.76716
13.14	1.93132	2.29313	1.96807	1.76783
13.15	1.92602	2.28602	1.97683	1.76021
13.16	1.92022	2.28684	1.98654	1.77082
13.17	1.92382	2.29238	1.98056	1.77221
13.18	1.92527	2.28406	1.9779	1.7847
13.19	1.90821	2.27953	1.98096	1.78936
13.2	1.91841	2.30186	1.97403	1.79676
13.21	1.92797	2.28146	1.9716	1.77832
13.22	1.91714	2.2927	1.98077	1.77803
13.23	1.90396	2.30508	1.98902	1.77043
13.24	1.91621	2.29928	1.98979	1.76995
13.25	1.90714	2.31738	1.99267	1.76436
13.26	1.9008	2.30351	1.98817	1.7581
13.27	1.9012	2.30368	1.99187	1.75192
13.28	1.90971	2.31198	1.99009	1.73981
13.29	1.9039	2.31255	1.98617	1.75155
13.3	1.912	2.3118	1.97706	1.75236
13.31	1.90375	2.31282	1.96977	1.74463
13.32	1.90754	2.32147	1.98176	1.74704
13.33	1.89979	2.31877	1.98841	1.75635
13.34	1.89637	2.31161	1.98488	1.76865
13.35	1.90358	2.31332	1.98958	1.76988
13.36	1.90098	2.32322	1.98952	1.76661
13.37	1.9108	2.32642	1.98668	1.76558
13.38	1.898	2.33415	1.9998	1.76768
13.39	1.89582	2.33427	1.98856	1.76078
13.4	1.89051	2.33075	1.98725	1.76783
13.41	1.89645	2.31655	1.99156	1.76635
13.42	1.90137	2.3085	1.99603	1.76163
13.43	1.89842	2.30433	1.98426	1.77158
13.44	1.90527	2.32045	1.98243	1.7669
13.45	1.89281	2.32593	2.0017	1.76553
13.46	1.90244	2.32447	1.99209	1.77936
13.47	1.90683	2.32457	1.9949	1.77874
13.48	1.91758	2.32124	1.99873	1.78407
13.49	1.91905	2.31985	1.99284	1.78766
13.5	1.91686	2.31466	1.99428	1.79898
13.51	1.9096	2.31752	1.99826	1.80754
13.52	1.91651	2.34124	1.98448	1.80144
13.53	1.90417	2.33321	1.98376	1.79585
13.54	1.90519	2.32588	1.99532	1.80325
13.55	1.91271	2.32511	1.97802	1.80478
13.56	1.91044	2.30785	1.9808	1.79483
13.57	1.90984	2.2962	1.98218	1.79336
13.58	1.91632	2.29458	1.99311	1.78695
13.59	1.90873	2.29142	1.99587	1.79196
13.6	1.91694	2.28201	1.9856	1.78876
13.61	1.91162	2.28103	1.97509	1.78882
13.62	1.90975	2.27099	1.97623	1.78101
13.63	1.90612	2.27579	1.97874	1.78459
13.64	1.90974	2.2891	1.98315	1.78699
13.65	1.89524	2.27287	1.97892	1.77327
13.66	1.91276	2.28113	1.97619	1.78788
13.67	1.92606	2.27663	1.97871	1.78243
13.68	1.9244	2.29279	1.97743	1.77526
13.69	1.92619	2.29487	1.97311	1.78439
13.7	1.92592	2.28576	1.99397	1.77971
13.71	1.91385	2.26531	1.99117	1.77739
13.72	1.92548	2.25278	1.98797	1.79401
13.73	1.9127	2.2484	1.9887	1.79781
13.74	1.92423	2.25025	1.97975	1.81452
13.75	1.93411	2.23678	1.99148	1.80255
13.76	1.9311	2.22304	1.97392	1.79697
13.77	1.92919	2.22198	1.98444	1.78777
13.78	1.9296	2.21065	1.98352	1.78179
13.79	1.93379	2.21363	1.97877	1.78935
13.8	1.94072	2.22869	1.98396	1.79821
13.81	1.93573	2.22461	1.98233	1.78543
13.82	1.95524	2.21364	1.98334	1.77516
13.83	1.95766	2.21408	1.97514	1.79624
13.84	1.94891	2.20731	1.9796	1.79135
13.85	1.94649	2.20102	1.97951	1.78915
13.86	1.94517	2.19739	1.97721	1.79381
13.87	1.9518	2.20255	1.98769	1.7931
13.88	1.93623	2.1952	1.99154	1.79118
13.89	1.94933	2.18355	1.982	1.77936
13.9	1.94285	2.16691	1.98221	1.76716
13.91	1.94318	2.17333	1.99281	1.7726
13.92	1.92859	2.1686	1.99286	1.77587
13.93	1.93744	2.16365	1.98352	1.77938
13.94	1.9544	2.16319	1.99665	1.79264
13.95	1.95823	2.15814	1.99184	1.77885
13.96	1.94847	2.1708	1.99577	1.78224
13.97	1.94474	2.17435	1.99253	1.78382
13.98	1.94379	2.17732	1.99228	1.77873
13.99	1.94201	2.17836	1.99561	1.79646
14	1.92558	2.17663	1.98181	1.79204
14.01	1.92478	2.18402	1.97804	1.79505
14.02	1.92288	2.17063	1.96509	1.78964
14.03	1.92811	2.17493	1.97031	1.79734
14.04	1.93579	2.17026	1.97741	1.79128
14.05	1.93873	2.16492	1.9767	1.80266
14.06	1.93636	2.16031	1.96929	1.80609
14.07	1.93149	2.16309	1.97752	1.81122
14.08	1.93321	2.16818	1.97088	1.80356
14.09	1.922	2.16445	1.97331	1.80842
14.1	1.91859	2.15471	1.96875	1.80322
14.11	1.91656	2.13554	1.9543	1.81826
14.12	1.91789	2.14147	1.96849	1.80576
14.13	1.89951	2.14405	1.96843	1.80664
14.14	1.89852	2.13833	1.97869	1.80628
14.15	1.91213	2.15269	1.96883	1.80155
14.16	1.91751	2.15072	1.96469	1.80774
14.17	1.91499	2.1445	1.96146	1.80451
14.18	1.91241	2.13167	1.96264	1.80724
14.19	1.91096	2.13935	1.96378	1.80675
14.2	1.90742	2.14906	1.96219	1.81124
14.21	1.90096	2.16294	1.96453	1.80048
14.22	1.90176	2.16484	1.96347	1.78983
14.23	1.89604	2.1835	1.96149	1.77851
14.24	1.89831	2.19053	1.96876	1.79164
14.25	1.90413	2.22082	1.95326	1.80716
14.26	1.905	2.2259	1.95885	1.79523
14.27	1.90776	2.23272	1.95837	1.80501
14.28	1.90978	2.24744	1.9459	1.80596
14.29	1.91774	2.23845	1.95884	1.79902
14.3	1.9124	2.22629	1.95405	1.78769
14.31	1.91183	2.23597	1.95355	1.79354
14.32	1.90173	2.24332	1.96501	1.78699
14.33	1.89953	2.23615	1.97543	1.77857
14.34	1.91538	2.22909	1.97777	1.78367
14.35	1.91132	2.21365	1.97491	1.76406
14.36	1.90524	2.21123	1.98358	1.77422
14.37	1.8953	2.20271	1.97253	1.77718
14.38	1.89752	2.18986	1.98604	1.77433
14.39	1.89914	2.19001	1.97909	1.78876
14.4	1.89387	2.19154	1.99282	1.78959
14.41	1.90609	2.19227	1.97549	1.78298
14.42	1.89274	2.17178	1.98457	1.76222
14.43	1.89309	2.18011	1.97797	1.76519
14.44	1.90302	2.18459	1.97881	1.77883
14.45	1.89854	2.19968	1.97948	1.77856
14.46	1.90553	2.20326	1.97594	1.79086
14.47	1.89251	2.18463	1.96764	1.79089
14.48	1.90781	2.18034	1.98103	1.79887
14.49	1.9058	2.19092	1.97353	1.78369
14.5	1.88982	2.19188	1.97478	1.79919
14.51	1.89967	2.17182	1.98649	1.80483
14.52	1.89188	2.17594	1.97567	1.78508
14.53	1.88355	2.16401	1.9837	1.78962
14.54	1.88139	2.18226	1.98558	1.7888
14.55	1.8782	2.19034	1.9837	1.78813
14.56	1.87857	2.18421	1.975	1.77643
14.57	1.86937	2.18643	1.98323	1.78325
14.58	1.88342	2.18032	1.9799	1.77475
14.59	1.8795	2.18199	1.98023	1.77138
14.6	1.88502	2.1835	1.9897	1.78158
14.61	1.89204	2.18865	1.98575	1.77648
14.62	1.88561	2.18773	1.98355	1.77591
14.63	1.88751	2.18416	1.98177	1.77587
14.64	1.88628	2.16297	1.97985	1.77868
14.65	1.88375	2.17247	1.96986	1.77653
14.66	1.90335	2.18677	1.97294	1.79268
14.67	1.90083	2.18611	1.97584	1.7977
14.68	1.90307	2.18787	1.97943	1.79924
14.69	1.90806	2.2042	1.98621	1.80671
14.7	1.91221	2.21071	1.98413	1.80754
14.71	1.90679	2.20488	1.97404	1.80264
14.72	1.8962	2.19278	1.96886	1.8073
14.73	1.90325	2.19263	1.97259	1.79586
14.74	1.89186	2.1845	1.9766	1.79941
14.75	1.90448	2.19279	1.97796	1.79869
14.76	1.89891	2.19527	1.96108	1.79078
14.77	1.90708	2.19625	1.95956	1.77767
14.78	1.89176	2.18308	1.96506	1.78823
14.79	1.90492	2.19213	1.95975	1.79958
14.8	1.91049	2.19501	1.95815	1.78603
14.81	1.8942	2.18852	1.9645	1.77516
14.82	1.89943	2.17438	1.95908	1.78147
14.83	1.89643	2.20024	1.954	1.77983
14.84	1.91028	2.20591	1.94551	1.78602
14.85	1.90495	2.21059	1.95908	1.78992
14.86	1.91816	2.21986	1.96817	1.78277
14.87	1.90485	2.2368	1.96509	1.7853
14.88	1.9182	2.21777	1.96547	1.77873
14.89	1.91342	2.22214	1.96602	1.77057
14.9	1.90787	2.22851	1.97246	1.77304
14.91	1.90918	2.2334	1.96904	1.77438
14.92	1.91391	2.23373	1.96175	1.77088
14.93	1.91984	2.21566	1.96657	1.76647
14.94	1.92419	2.23165	1.95646	1.76314
14.95	1.90963	2.23798	1.95402	1.77052
14.96	1.89758	2.22637	1.95503	1.75584
14.97	1.90079	2.22681	1.95976	1.75311
14.98	1.91132	2.23615	1.95017	1.74464
14.99	1.9331	2.23424	1.94967	1.75726
15	1.92183	2.23326	1.9531	1.75584
15.01	1.91267	2.24392	1.96132	1.74091
15.02	1.90327	2.24215	1.9649	1.74515
15.03	1.89918	2.24416	1.95771	1.73313
15.04	1.90483	2.23011	1.96032	1.7284
15.05	1.90573	2.21789	1.96024	1.72506
15.06	1.89352	2.22445	1.96521	1.73853
15.07	1.9007	2.2298	1.96139	1.73957
15.08	1.90191	2.22163	1.96389	1.73501
15.09	1.90083	2.23539	1.95792	1.74158
15.1	1.91006	2.23583	1.97236	1.73728
15.11	1.91151	2.23283	1.97563	1.7396
15.12	1.89295	2.23552	1.97322	1.72653
15.13	1.88449	2.23477	1.96057	1.73425
15.14	1.90167	2.25181	1.95542	1.72758
15.15	1.89781	2.26071	1.95685	1.72413
15.16	1.90539	2.26678	1.97002	1.72184
15.17	1.90196	2.26625	1.96202	1.7352
15.18	1.91294	2.25836	1.96916	1.72821
15.19	1.89989	2.25863	1.97392	1.72807
15.2	1.90313	2.25654	1.96833	1.74109
15.21	1.90558	2.2584	1.97783	1.7391
15.22	1.90223	2.24842	1.96906	1.74573
15.23	1.909	2.25368	1.97773	1.74855
15.24	1.89208	2.27193	1.95644	1.77573
15.25	1.90152	2.25402	1.97482	1.77045
15.26	1.89925	2.24948	1.97217	1.77648
15.27	1.89695	2.24671	1.96567	1.78756
15.28	1.89819	2.24899	1.96683	1.79348
15.29	1.88985	2.24666	1.9687	1.77347
15.3	1.89372	2.23418	1.97115	1.78008
15.31	1.89077	2.23609	1.96925	1.79128
15.32	1.884	2.26148	1.97413	1.77856
15.33	1.8868	2.26083	1.97609	1.80009
15.34	1.90075	2.27025	1.96829	1.79893
15.35	1.89993	2.27113	1.96856	1.78718
15.36	1.88955	2.27458	1.96482	1.80164
15.37	1.91021	2.26647	1.97	1.79637
15.38	1.89801	2.24503	1.97804	1.80334
15.39	1.90106	2.26708	1.96869	1.79401
15.4	1.90524	2.27707	1.96549	1.78243
15.41	1.90281	2.27555	1.9799	1.79606
15.42	1.9043	2.27709	1.9842	1.79672
15.43	1.89584	2.28076	1.97648	1.78829
15.44	1.88061	2.28241	1.98069	1.77751
15.45	1.89143	2.28539	1.97408	1.78707
15.46	1.89353	2.27713	1.9739	1.77706
15.47	1.889	2.28657	1.98562	1.7949
15.48	1.90415	2.27909	1.98021	1.7885
15.49	1.88985	2.2923	1.97658	1.78076
15.5	1.89713	2.26969	1.97899	1.78418
15.51	1.8858	2.26767	1.96802	1.7833
15.52	1.89003	2.27633	1.96504	1.78237
15.53	1.88875	2.27575	1.97246	1.78907
15.54	1.91455	2.26678	1.98774	1.7881
15.55	1.90556	2.28415	1.97952	1.79276
15.56	1.90135	2.25809	1.97199	1.78789
15.57	1.90087	2.24865	1.97446	1.79541
15.58	1.89284	2.26196	1.97088	1.79346
15.59	1.89335	2.25128	1.96715	1.78582
15.6	1.9043	2.26027	1.95709	1.79621
15.61	1.89167	2.25311	1.97341	1.79215
15.62	1.89293	2.24053	1.98297	1.78533
15.63	1.88653	2.24625	1.97415	1.78705
15.64	1.88878	2.25646	1.97992	1.79333
15.65	1.88759	2.24654	1.97141	1.77854
15.66	1.89486	2.23584	1.97631	1.77414
15.67	1.89592	2.24868	1.97881	1.78643
15.68	1.89613	2.23422	1.98908	1.80122
15.69	1.89609	2.24525	1.99886	1.8062
15.7	1.90206	2.22367	1.97828	1.79384
15.71	1.89007	2.22326	1.9729	1.80245
15.72	1.90684	2.22255	1.97498	1.78723
15.73	1.90496	2.20179	1.97243	1.79031
15.74	1.91167	2.22905	1.97234	1.79069
15.75	1.89564	2.21349	1.97031	1.78485
15.76	1.90058	2.22284	1.97377	1.79428
15.77	1.89623	2.23024	1.98514	1.7862
15.78	1.9016	2.22446	1.98251	1.77784
15.79	1.8875	2.21917	1.98346	1.7924
15.8	1.90059	2.22651	1.97915	1.78349
15.81	1.89326	2.24251	1.97913	1.77735
15.82	1.88858	2.22669	1.97825	1.77575
15.83	1.9066	2.24529	1.96946	1.7675
15.84	1.9072	2.24997	1.98101	1.77562
15.85	1.90544	2.23348	1.97798	1.76776
15.86	1.9084	2.24274	1.98063	1.76603
15.87	1.90687	2.25007	1.96746	1.75635
15.88	1.90433	2.25361	1.97164	1.76315
15.89	1.90668	2.23883	1.96928	1.77474
15.9	1.89407	2.24068	1.96848	1.76311
15.91	1.89915	2.25078	1.97393	1.7712
15.92	1.89545	2.24495	1.97948	1.75023
15.93	1.8926	2.23677	1.97991	1.75875
15.94	1.89729	2.22802	1.97129	1.76925
15.95	1.88788	2.24724	1.97553	1.75429
15.96	1.88646	2.23803	1.97145	1.76713
15.97	1.8814	2.23182	1.97734	1.75912
15.98	1.89527	2.22448	1.97685	1.76792
15.99	1.89235	2.23391	1.98276	1.75625
16	1.89524	2.23125	1.98222	1.76575
16.01	1.89176	2.23513	1.97287	1.75822
16.02	1.89268	2.21733	1.98228	1.75778
16.03	1.89363	2.22467	1.98795	1.75298
16.04	1.89983	2.22356	1.99094	1.75484
16.05	1.88556	2.23485	1.98674	1.74809
16.06	1.88608	2.23711	1.99275	1.74581
16.07	1.89694	2.23551	1.99106	1.74922
16.08	1.89429	2.25391	1.99748	1.75401
16.09	1.89707	2.27035	1.99085	1.75307
16.1	1.90491	2.26357	1.99068	1.75186
16.11	1.89073	2.24217	1.99278	1.75262
16.12	1.89501	2.25753	2.00317	1.74303
16.13	1.87886	2.2662	1.99907	1.7501
16.14	1.87526	2.26647	1.99224	1.74919
16.15	1.8807	2.26546	1.97935	1.74035
16.16	1.88501	2.26798	1.98383	1.74093
16.17	1.88457	2.25212	1.9817	1.74272
16.18	1.89553	2.24541	1.98036	1.75548
16.19	1.88315	2.25017	1.97507	1.7493
16.2	1.88488	2.23723	1.9589	1.74434
16.21	1.8824	2.24048	1.95761	1.74672
16.22	1.88277	2.25047	1.96853	1.74698
16.23	1.87846	2.25378	1.96742	1.74991
16.24	1.88113	2.24106	1.96687	1.74528
16.25	1.89068	2.2541	1.9684	1.74545
16.26	1.88362	2.24932	1.97558	1.74226
16.27	1.88432	2.24825	1.96486	1.76002
16.28	1.8839	2.26617	1.96613	1.7592
16.29	1.88549	2.26909	1.96625	1.75405
16.3	1.87252	2.2683	1.95384	1.75844
16.31	1.87691	2.24609	1.95488	1.75909
16.32	1.87873	2.26116	1.96672	1.77109
16.33	1.88861	2.26931	1.96221	1.76735
16.34	1.88612	2.29975	1.97099	1.76994
16.35	1.87938	2.28868	1.97635	1.75188
16.36	1.88273	2.28791	1.96868	1.7498
16.37	1.88406	2.2932	1.97662	1.74848
16.38	1.89384	2.28893	1.97543	1.74124
16.39	1.8865	2.26612	1.96632	1.74923
16.4	1.8911	2.29005	1.97482	1.74716
16.41	1.89346	2.29735	1.96326	1.74816
16.42	1.89003	2.3056	1.96511	1.74667
16.43	1.89288	2.32106	1.96518	1.75207
16.44	1.90018	2.30927	1.96211	1.74094
16.45	1.89449	2.29132	1.95754	1.73751
16.46	1.8929	2.2991	1.961	1.73924
16.47	1.90194	2.26964	1.96325	1.73916
16.48	1.90603	2.26661	1.95438	1.74251
16.49	1.90893	2.28941	1.95819	1.73927
16.5	1.90961	2.2617	1.96802	1.73033
16.51	1.89315	2.25909	1.97095	1.73629
16.52	1.90727	2.27229	1.97041	1.7252
16.53	1.92342	2.26737	1.96894	1.73844
16.54	1.91724	2.25588	1.97854	1.74292
16.55	1.90356	2.26857	1.98047	1.73176
16.56	1.91039	2.26495	1.98502	1.72775
16.57	1.91282	2.26979	1.98982	1.71588
16.58	1.89757	2.26987	1.98812	1.71747
16.59	1.90664	2.26845	1.99399	1.7126
16.6	1.91038	2.27549	1.98793	1.72928
16.61	1.91005	2.26923	1.98399	1.72759
16.62	1.9104	2.27395	1.97387	1.72081
16.63	1.90134	2.26244	1.96821	1.73977
16.64	1.89259	2.28163	1.97614	1.73215
16.65	1.89221	2.29105	1.96406	1.72934
16.66	1.89969	2.28169	1.96561	1.72755
16.67	1.89958	2.28619	1.96475	1.7267
16.68	1.89973	2.30669	1.96543	1.72066
16.69	1.90579	2.30632	1.97356	1.71647
16.7	1.89842	2.28807	1.97928	1.72426
16.71	1.90187	2.26949	1.97909	1.7219
16.72	1.90511	2.28919	1.96822	1.72562
16.73	1.89286	2.29672	1.978	1.71329
16.74	1.89387	2.28715	1.97898	1.70975
16.75	1.9056	2.28166	1.97903	1.7181
16.76	1.89837	2.26648	1.98274	1.70872
16.77	1.89821	2.26447	1.97689	1.69817
16.78	1.90692	2.25431	1.97904	1.69982
16.79	1.90758	2.25547	1.98389	1.70888
16.8	1.89899	2.24798	1.97472	1.70294
16.81	1.91275	2.2496	1.98557	1.71915
16.82	1.92238	2.26233	1.9846	1.6944
16.83	1.91899	2.25322	1.98698	1.70047
16.84	1.91977	2.25094	1.97551	1.70947
16.85	1.91457	2.23978	1.97463	1.70976
16.86	1.93335	2.26266	1.97151	1.70466
16.87	1.93447	2.27004	1.97905	1.72033
16.88	1.93612	2.258	1.97925	1.72445
16.89	1.94171	2.2521	1.98197	1.71911
16.9	1.92586	2.26765	1.98491	1.72443
16.91	1.93322	2.26393	1.98959	1.72815
16.92	1.92129	2.26304	1.98817	1.74176
16.93	1.9168	2.26171	1.99454	1.75413
16.94	1.91643	2.26821	1.99324	1.76246
16.95	1.9096	2.26011	1.98844	1.77077
16.96	1.89945	2.25844	1.98946	1.76521
16.97	1.91073	2.26276	1.99013	1.76204
16.98	1.90927	2.26808	1.98852	1.76918
16.99	1.91058	2.25338	2.00017	1.76507
17	1.91095	2.26267	1.98801	1.77496
17.01	1.92673	2.27886	1.99191	1.76417
17.02	1.91515	2.26795	1.99249	1.75674
17.03	1.92888	2.25203	1.99357	1.77101
17.04	1.92581	2.27313	1.99806	1.77554
17.05	1.91785	2.29676	1.98734	1.7792
17.06	1.92613	2.30202	1.98811	1.79456
17.07	1.9228	2.30198	1.98847	1.79364
17.08	1.91631	2.30495	1.99589	1.78254
17.09	1.91132	2.3066	1.99337	1.77297
17.1	1.92507	2.30179	1.99026	1.77575
17.11	1.92311	2.31593	1.99484	1.78137
17.12	1.93147	2.33436	1.99855	1.77741
17.13	1.92598	2.31518	1.99622	1.76495
17.14	1.93251	2.30683	2.00246	1.7528
17.15	1.93468	2.32114	1.99591	1.75971
17.16	1.9328	2.30829	1.99599	1.75955
17.17	1.95112	2.28034	1.97755	1.76381
17.18	1.95394	2.28848	1.98405	1.76485
17.19	1.94681	2.28214	1.99013	1.75666
17.2	1.93968	2.27593	1.97794	1.75381
17.21	1.94159	2.27748	1.98668	1.75253
17.22	1.92269	2.26936	1.9802	1.76763
17.23	1.92728	2.27249	1.97215	1.75607
17.24	1.93678	2.26967	1.98607	1.77201
17.25	1.93282	2.28102	1.97586	1.77793
17.26	1.92875	2.29682	1.95744	1.77746
17.27	1.93942	2.29319	1.96185	1.76815
17.28	1.93774	2.28963	1.96037	1.76458
17.29	1.94025	2.28124	1.95228	1.76515
17.3	1.93432	2.27373	1.9609	1.75654
17.31	1.93913	2.27114	1.9669	1.76285
17.32	1.94469	2.27564	1.95965	1.75207
17.33	1.95409	2.26264	1.96689	1.75375
17.34	1.94379	2.26662	1.96187	1.76865
17.35	1.93751	2.27465	1.97145	1.76552
17.36	1.94816	2.25161	1.96935	1.7702
17.37	1.94529	2.25162	1.97568	1.76175
17.38	1.9434	2.24788	1.9528	1.76206
17.39	1.95745	2.23945	1.96751	1.76042
17.4	1.95777	2.25201	1.96981	1.77047
17.41	1.95732	2.26127	1.97146	1.78229
17.42	1.95688	2.25803	1.98358	1.77558
17.43	1.95096	2.24647	1.97779	1.77155
17.44	1.93423	2.22808	1.98522	1.76937
17.45	1.9376	2.24173	1.99005	1.78584
17.46	1.92866	2.23247	1.97798	1.77342
17.47	1.93659	2.24223	1.97668	1.76898
17.48	1.92615	2.24888	1.97518	1.77695
17.49	1.92977	2.24966	1.96404	1.77391
17.5	1.92145	2.2512	1.96367	1.76814
17.51	1.92334	2.23761	1.97089	1.77909
17.52	1.9369	2.23695	1.96398	1.77493
17.53	1.93772	2.24327	1.96865	1.76994
17.54	1.93771	2.24613	1.9688	1.77434
17.55	1.93913	2.24638	1.97376	1.77394
17.56	1.94075	2.24968	1.97864	1.77141
17.57	1.93526	2.25553	1.97075	1.76273
17.58	1.93116	2.262	1.9809	1.76553
17.59	1.93294	2.24775	1.9839	1.75101
17.6	1.92266	2.25766	1.97392	1.75549
17.61	1.93279	2.2639	1.98378	1.75972
17.62	1.91188	2.25446	1.97813	1.7524
17.63	1.92079	2.23544	1.98017	1.74499
17.64	1.90913	2.23655	1.97758	1.74811
17.65	1.9132	2.2293	1.9741	1.75232
17.66	1.90916	2.24631	1.95956	1.75876
17.67	1.91865	2.26321	1.98341	1.76569
17.68	1.92407	2.24964	1.98178	1.77361
17.69	1.91163	2.24025	1.99172	1.77466
17.7	1.91283	2.24517	1.98	1.7774
17.71	1.91701	2.25308	1.98999	1.7776
17.72	1.91687	2.24855	1.98237	1.78238
17.73	1.91426	2.26601	1.98013	1.78251
17.74	1.92383	2.27085	1.98825	1.79652
17.75	1.92396	2.2693	1.98259	1.78905
17.76	1.92624	2.2671	1.99305	1.78721
17.77	1.92595	2.27782	1.99038	1.8123
17.78	1.91443	2.2831	1.98011	1.80143
17.79	1.91131	2.27772	1.97433	1.79974
17.8	1.90953	2.29656	1.96877	1.80359
17.81	1.91571	2.28818	1.98344	1.79521
17.82	1.90888	2.30425	1.98028	1.79146
17.83	1.90166	2.30918	1.99185	1.79866
17.84	1.90862	2.30007	1.99741	1.78917
17.85	1.90537	2.29976	1.9842	1.79613
17.86	1.9062	2.30159	1.98745	1.79201
17.87	1.89393	2.30162	1.97568	1.79383
17.88	1.89946	2.31448	1.97454	1.78051
17.89	1.90234	2.32279	1.99232	1.77615
17.9	1.90684	2.32033	1.97724	1.78675
17.91	1.91207	2.32842	1.98122	1.78499
17.92	1.91057	2.32995	1.98782	1.79269
17.93	1.90309	2.32549	1.97894	1.80105
17.94	1.90667	2.34003	1.98299	1.80444
17.95	1.91003	2.32782	1.9754	1.81117
17.96	1.90109	2.30445	1.98623	1.81192
17.97	1.90389	2.29902	1.98234	1.80008
17.98	1.90241	2.30438	1.98955	1.79578
17.99	1.9009	2.31275	1.99101	1.80299
18	1.89547	2.31561	1.98403	1.80169
18.01	1.90127	2.33541	1.97734	1.78546
18.02	1.90916	2.34959	1.98489	1.79006
18.03	1.91587	2.35157	1.97719	1.79652
18.04	1.9129	2.36472	1.97942	1.79858
18.05	1.90652	2.35549	1.99302	1.80159
18.06	1.90094	2.35296	1.98794	1.78405
18.07	1.89738	2.35721	1.99151	1.79137
18.08	1.90054	2.36025	1.97911	1.80832
18.09	1.90646	2.35164	1.98572	1.80073
18.1	1.90505	2.35277	1.99318	1.80102
18.11	1.90421	2.3263	2.00231	1.8048
18.12	1.90638	2.33155	1.99635	1.8178
18.13	1.9128	2.35271	1.99531	1.82546
18.14	1.91276	2.36036	2.00245	1.82784
18.15	1.90756	2.35148	2.01192	1.84623
18.16	1.90619	2.36121	2.00373	1.84962
18.17	1.91003	2.3537	2.0042	1.84116
18.18	1.90064	2.36921	2.00525	1.83517
18.19	1.89504	2.3682	2.00453	1.84377
18.2	1.89202	2.35965	2.00319	1.83066
18.21	1.89931	2.36281	2.0023	1.81241
18.22	1.88503	2.32933	2.01649	1.80598
18.23	1.89361	2.33513	1.99706	1.80835
18.24	1.88917	2.35954	2.00467	1.8076
18.25	1.89465	2.37119	2.01218	1.80857
18.26	1.89171	2.36692	2.00694	1.81677
18.27	1.88481	2.36019	2.01941	1.82688
18.28	1.89198	2.37128	2.00835	1.83251
18.29	1.88685	2.364	2.00755	1.82727
18.3	1.87946	2.35638	2.00856	1.81811
18.31	1.88165	2.35853	2.00881	1.81661
18.32	1.88695	2.34257	1.99791	1.84049
18.33	1.87883	2.33907	2.00141	1.83774
18.34	1.8791	2.34819	2.00433	1.82962
18.35	1.8732	2.33698	1.99859	1.83456
18.36	1.87325	2.34167	1.99514	1.84567
18.37	1.8638	2.34602	2.00485	1.83421
18.38	1.88002	2.33325	2.00984	1.83489
18.39	1.8771	2.34283	2.0072	1.84155
18.4	1.87591	2.34536	2.01871	1.84274
18.41	1.87922	2.34965	2.00979	1.84393
18.42	1.88229	2.34635	2.00587	1.8488
18.43	1.886	2.35447	2.00779	1.84471
18.44	1.86973	2.35083	2.00444	1.84327
18.45	1.88177	2.33331	2.00974	1.81688
18.46	1.87603	2.34611	2.01098	1.82237
18.47	1.85582	2.35491	2.01116	1.8147
18.48	1.86669	2.33816	2.00078	1.81305
18.49	1.86751	2.34816	2.00393	1.79865
18.5	1.86958	2.3404	2.00555	1.80256
18.51	1.87798	2.34711	1.99414	1.81565
18.52	1.86813	2.34279	2.00073	1.81442
18.53	1.86413	2.34189	1.99975	1.8103
18.54	1.86438	2.33936	1.9985	1.82026
18.55	1.87666	2.3348	2.00128	1.80877
18.56	1.86876	2.33962	1.99213	1.82156
18.57	1.85406	2.32259	1.99652	1.80321
18.58	1.86515	2.31893	1.99863	1.80424
18.59	1.86574	2.33178	1.99202	1.81362
18.6	1.85494	2.32096	1.98483	1.81362
18.61	1.86673	2.31512	2.00136	1.82128
18.62	1.86863	2.33503	2.00745	1.82692
18.63	1.86335	2.33171	2.00407	1.8156
18.64	1.86776	2.33494	2.00192	1.81533
18.65	1.86482	2.31586	2.00946	1.81039
18.66	1.87622	2.3181	2.00888	1.7993
18.67	1.86964	2.31537	1.99399	1.79777
18.68	1.87745	2.32563	1.98988	1.79785
18.69	1.87885	2.33883	1.99762	1.79321
18.7	1.86495	2.3275	1.99603	1.80197
18.71	1.86588	2.32621	2.00682	1.7733
18.72	1.86291	2.32192	2.00481	1.78002
18.73	1.85876	2.30426	2.01057	1.77888
18.74	1.85873	2.29942	2.01778	1.77734
18.75	1.86355	2.31045	2.01295	1.77644
18.76	1.8701	2.30991	2.00575	1.77425
18.77	1.87537	2.31417	2.01847	1.76978
18.78	1.87164	2.31424	2.01248	1.77051
18.79	1.8579	2.31424	2.01191	1.76279
18.8	1.85917	2.30374	1.99554	1.75518
18.81	1.8603	2.30476	2.0175	1.7615
18.82	1.86757	2.29909	2.01553	1.7521
18.83	1.86191	2.28724	2.00932	1.73827
18.84	1.85636	2.29378	2.00518	1.72325
18.85	1.86437	2.29682	2.00709	1.72477
18.86	1.86535	2.27868	2.00676	1.73193
18.87	1.85807	2.27687	2.0072	1.72889
18.88	1.85755	2.28094	2.00408	1.73505
18.89	1.86054	2.27269	1.99795	1.72892
18.9	1.87353	2.26806	1.99931	1.73916
18.91	1.86982	2.25857	1.99551	1.72463
18.92	1.86988	2.26712	2.00687	1.73702
18.93	1.86806	2.2615	1.99895	1.74107
18.94	1.8519	2.25283	2.00476	1.72907
18.95	1.86369	2.24773	2.00238	1.73402
18.96	1.86031	2.23559	1.99831	1.73102
18.97	1.87292	2.23333	1.99505	1.739
18.98	1.86028	2.24965	2.00445	1.74332
18.99	1.85521	2.24055	2.00547	1.73655
19	1.85768	2.25503	1.9956	1.73666
19.01	1.85591	2.25023	1.98978	1.74421
19.02	1.85643	2.2488	1.99511	1.74209
19.03	1.85439	2.25573	2.00156	1.74003
19.04	1.85453	2.25075	1.99719	1.75139
19.05	1.85577	2.24102	2.01057	1.7538
19.06	1.84772	2.26744	2.00745	1.75063
19.07	1.85274	2.25422	2.0096	1.75524
19.08	1.85905	2.24316	1.99981	1.75289
19.09	1.85859	2.24448	1.99729	1.74851
19.1	1.86388	2.2509	1.99499	1.75339
19.11	1.85401	2.24238	1.99509	1.76136
19.12	1.85905	2.23096	2.00012	1.75314
19.13	1.86126	2.23261	1.99858	1.75292
19.14	1.86273	2.25058	1.99457	1.75002
19.15	1.86246	2.25124	1.98696	1.73991
19.16	1.88046	2.2553	1.98329	1.74892
19.17	1.86435	2.23356	1.99654	1.73119
19.18	1.86654	2.23512	1.99276	1.74771
19.19	1.8633	2.21535	1.9879	1.76038
19.2	1.87389	2.20856	1.99908	1.76334
19.21	1.87409	2.2036	1.99293	1.75794
19.22	1.86091	2.20287	1.9898	1.75291
19.23	1.88072	2.22194	2.00023	1.7509
19.24	1.87311	2.22211	1.99591	1.75843
19.25	1.86508	2.24094	1.99258	1.76209
19.26	1.86897	2.23011	1.9985	1.75622
19.27	1.88059	2.2107	1.99649	1.75727
19.28	1.87874	2.19885	1.99642	1.7543
19.29	1.88215	2.19555	1.99762	1.76214
19.3	1.8983	2.19194	1.99469	1.76028
19.31	1.88779	2.18417	2.00311	1.77701
19.32	1.88358	2.18204	2.00615	1.78079
19.33	1.8738	2.18388	2.00771	1.77723
19.34	1.88761	2.1712	2.00562	1.77676
19.35	1.87982	2.17947	2.01732	1.78768
19.36	1.8828	2.16648	2.0135	1.77978
19.37	1.87507	2.16319	2.01389	1.77556
19.38	1.87621	2.18722	2.02215	1.78913
19.39	1.87815	2.20536	2.01391	1.7785
19.4	1.86875	2.2071	2.00535	1.79651
19.41	1.85901	2.19059	2.01242	1.78132
19.42	1.87379	2.20736	2.01174	1.79089
19.43	1.87364	2.20585	2.00661	1.78461
19.44	1.86403	2.20827	2.00758	1.78199
19.45	1.8594	2.2061	2.01472	1.78877
19.46	1.8567	2.20529	2.02295	1.80809
19.47	1.86353	2.19997	2.01639	1.80978
19.48	1.87689	2.19622	2.01775	1.81939
19.49	1.86766	2.19261	2.02081	1.80283
19.5	1.87231	2.20916	2.01752	1.78872
19.51	1.87441	2.19945	2.01027	1.79202
19.52	1.87003	2.20686	2.00864	1.81249
19.53	1.87175	2.19749	2.01166	1.805
19.54	1.87045	2.19759	2.01557	1.80175
19.55	1.86711	2.16952	2.01875	1.80831
19.56	1.87163	2.16407	2.02328	1.79449
19.57	1.87432	2.17996	2.01608	1.78942
19.58	1.87996	2.1821	2.01468	1.79201
19.59	1.87551	2.17848	2.01043	1.80505
19.6	1.87477	2.1827	2.01399	1.80831
19.61	1.87421	2.18316	2.01413	1.81005
19.62	1.87228	2.19378	2.016	1.80985
19.63	1.8721	2.20257	2.01339	1.79459
19.64	1.86446	2.21167	2.01179	1.79013
19.65	1.87087	2.20718	2.00121	1.78307
19.66	1.87001	2.21158	2.00931	1.79244
19.67	1.87207	2.19559	2.01284	1.7971
19.68	1.87177	2.20275	2.01337	1.81204
19.69	1.87693	2.2043	2.02524	1.80931
19.7	1.86739	2.20387	2.02204	1.79339
19.71	1.88295	2.20066	2.02273	1.79001
19.72	1.89487	2.20831	2.01549	1.79502
19.73	1.87636	2.21095	2.01813	1.79685
19.74	1.88201	2.22116	2.01397	1.79159
19.75	1.8831	2.23356	2.01829	1.79858
19.76	1.87271	2.22357	2.01358	1.79593
19.77	1.88366	2.23169	2.00812	1.78871
19.78	1.87869	2.21885	2.01797	1.78293
19.79	1.87768	2.2109	2.00335	1.78206
19.8	1.88102	2.21109	2.009	1.79046
19.81	1.88789	2.21265	2.0114	1.80405
19.82	1.87316	2.22753	2.01824	1.80923
19.83	1.86952	2.21162	2.00418	1.80422
19.84	1.87002	2.22005	2.01318	1.81227
19.85	1.87668	2.20762	2.01198	1.80356
19.86	1.8735	2.21758	2.01741	1.80298
19.87	1.87281	2.20602	2.01113	1.8084
19.88	1.88019	2.18943	2.01909	1.82676
19.89	1.88535	2.19739	2.019	1.83265
19.9	1.8894	2.18392	2.01929	1.84327
19.91	1.89274	2.18359	2.01642	1.84665
19.92	1.89218	2.19926	2.02172	1.84693
19.93	1.88998	2.19659	2.01858	1.84339
19.94	1.89276	2.20284	2.02312	1.85737
19.95	1.89469	2.18503	2.00919	1.85241
19.96	1.9008	2.19268	2.00991	1.83459
19.97	1.88733	2.19559	2.01356	1.82423
19.98	1.89619	2.18917	2.00984	1.82693
[truncated: 3,002 more rows]

## Sheet: RMSD
Time (ns)	Pentamer M-CMV CP	Pentamer Q-CMV CP	Hexamer M-CMV CP	Hexamer Q-CMV CP
0	0.0363881	0.0004983	0.0363881	0.0386682
0.01	0.0889546	0.0841915	0.0889546	0.0757572
0.02	0.0983335	0.0960456	0.0983335	0.0848256
0.03	0.108688	0.108429	0.108688	0.090281
0.04	0.104442	0.105454	0.104442	0.0995393
0.05	0.112198	0.108464	0.112198	0.10343
0.06	0.111877	0.111375	0.111877	0.0985221
0.07	0.113625	0.113788	0.113625	0.107509
0.08	0.115955	0.109771	0.115955	0.111575
0.09	0.113023	0.115753	0.113023	0.124653
0.1	0.123396	0.121025	0.123396	0.119497
0.11	0.12449	0.127797	0.12449	0.119738
0.12	0.120031	0.120855	0.120031	0.118233
0.13	0.122743	0.120182	0.122743	0.13434
0.14	0.13371	0.118321	0.13371	0.135295
0.15	0.143452	0.125304	0.143452	0.120169
0.16	0.139427	0.121393	0.139427	0.137901
0.17	0.137172	0.117679	0.137172	0.147727
0.18	0.139861	0.127191	0.139861	0.152072
0.19	0.15205	0.128801	0.15205	0.153136
0.2	0.147491	0.1277	0.147491	0.145059
0.21	0.148343	0.132105	0.148343	0.149905
0.22	0.136174	0.131699	0.136174	0.150509
0.23	0.137054	0.137302	0.137054	0.146094
0.24	0.14621	0.130865	0.14621	0.141699
0.25	0.152258	0.142771	0.152258	0.157887
0.26	0.143745	0.135281	0.143745	0.157535
0.27	0.153529	0.133191	0.153529	0.154915
0.28	0.155907	0.127034	0.155907	0.161738
0.29	0.13905	0.135393	0.13905	0.164539
0.3	0.145445	0.13277	0.145445	0.170872
0.31	0.131846	0.139736	0.131846	0.172792
0.32	0.14959	0.144242	0.14959	0.170227
0.33	0.145794	0.138607	0.145794	0.168122
0.34	0.155863	0.128994	0.155863	0.174383
0.35	0.158312	0.134726	0.158312	0.17624
0.36	0.142849	0.131055	0.142849	0.161862
0.37	0.139579	0.132697	0.139579	0.157434
0.38	0.136351	0.130388	0.136351	0.156949
0.39	0.138421	0.136685	0.138421	0.150814
0.4	0.151471	0.144399	0.151471	0.143141
0.41	0.152148	0.141801	0.152148	0.142115
0.42	0.149913	0.137984	0.149913	0.143956
0.43	0.152687	0.131439	0.152687	0.144205
0.44	0.142058	0.164255	0.142058	0.151569
0.45	0.140487	0.170123	0.140487	0.150759
0.46	0.158015	0.171865	0.158015	0.149221
0.47	0.164441	0.171372	0.164441	0.156162
0.48	0.158649	0.169802	0.158649	0.14671
0.49	0.155586	0.166509	0.155586	0.142282
0.5	0.15631	0.160884	0.15631	0.142445
0.51	0.162466	0.16657	0.162466	0.150471
0.52	0.166481	0.168057	0.166481	0.144219
0.53	0.161898	0.170187	0.161898	0.150635
0.54	0.168791	0.18194	0.168791	0.155283
0.55	0.16713	0.164887	0.16713	0.162439
0.56	0.15504	0.161557	0.15504	0.15781
0.57	0.171789	0.158853	0.171789	0.159243
0.58	0.158181	0.162743	0.158181	0.15893
0.59	0.158868	0.168622	0.158868	0.170816
0.6	0.158965	0.181455	0.158965	0.170278
0.61	0.164373	0.176557	0.164373	0.1685
0.62	0.157423	0.170524	0.157423	0.162797
0.63	0.164304	0.167786	0.164304	0.154342
0.64	0.166044	0.169146	0.166044	0.157114
0.65	0.171297	0.169899	0.171297	0.148119
0.66	0.177361	0.187939	0.177361	0.156051
0.67	0.162633	0.202687	0.162633	0.160166
0.68	0.16747	0.202149	0.16747	0.160089
0.69	0.151741	0.177553	0.151741	0.156521
0.7	0.162686	0.180709	0.162686	0.14558
0.71	0.157799	0.173326	0.157799	0.151551
0.72	0.170047	0.177672	0.170047	0.149457
0.73	0.168335	0.175291	0.168335	0.144126
0.74	0.173695	0.168521	0.173695	0.145677
0.75	0.165605	0.166678	0.165605	0.145396
0.76	0.159998	0.172915	0.159998	0.145502
0.77	0.154395	0.179765	0.154395	0.144915
0.78	0.154528	0.166705	0.154528	0.140227
0.79	0.167339	0.176867	0.167339	0.144244
0.8	0.170456	0.182801	0.170456	0.138136
0.81	0.183079	0.18646	0.183079	0.148887
0.82	0.159947	0.184718	0.159947	0.144069
0.83	0.161297	0.175905	0.161297	0.139939
0.84	0.168323	0.175976	0.168323	0.141945
0.85	0.18239	0.172109	0.18239	0.142956
0.86	0.180919	0.172357	0.180919	0.141872
0.87	0.179767	0.173172	0.179767	0.147094
0.88	0.188691	0.17478	0.188691	0.154663
0.89	0.182314	0.174758	0.182314	0.147839
0.9	0.191197	0.159989	0.191197	0.141801
0.91	0.198729	0.155992	0.198729	0.154365
0.92	0.208062	0.169297	0.208062	0.148813
0.93	0.213338	0.159358	0.213338	0.155483
0.94	0.200817	0.166321	0.200817	0.16505
0.95	0.194188	0.169906	0.194188	0.162555
0.96	0.200631	0.17875	0.200631	0.160932
0.97	0.195295	0.177859	0.195295	0.164903
0.98	0.205474	0.159793	0.205474	0.163625
0.99	0.216983	0.172058	0.216983	0.153028
1	0.201511	0.161557	0.201511	0.150346
1.01	0.216018	0.160377	0.216018	0.153134
1.02	0.220581	0.163652	0.220581	0.154828
1.03	0.223585	0.175102	0.223585	0.159607
1.04	0.213678	0.154299	0.213678	0.164867
1.05	0.210361	0.167194	0.210361	0.172458
1.06	0.215604	0.161487	0.215604	0.170306
1.07	0.228153	0.162835	0.228153	0.167302
1.08	0.234431	0.16964	0.234431	0.164039
1.09	0.234707	0.157307	0.234707	0.177599
1.1	0.216695	0.170304	0.216695	0.166856
1.11	0.224785	0.159436	0.224785	0.165918
1.12	0.211375	0.1523	0.211375	0.166132
1.13	0.214494	0.164651	0.214494	0.172777
1.14	0.21042	0.165433	0.21042	0.165334
1.15	0.217977	0.164293	0.217977	0.184395
1.16	0.222102	0.154696	0.222102	0.174263
1.17	0.201578	0.16942	0.201578	0.165221
1.18	0.196657	0.170233	0.196657	0.176301
1.19	0.201869	0.152885	0.201869	0.185243
1.2	0.204795	0.162647	0.204795	0.184595
1.21	0.184647	0.173852	0.184647	0.193121
1.22	0.18313	0.168363	0.18313	0.190866
1.23	0.201159	0.165833	0.201159	0.198459
1.24	0.200029	0.163168	0.200029	0.203597
1.25	0.202152	0.159317	0.202152	0.206445
1.26	0.187823	0.160855	0.187823	0.19101
1.27	0.196159	0.163903	0.196159	0.199413
1.28	0.194238	0.164362	0.194238	0.204187
1.29	0.204296	0.15606	0.204296	0.203824
1.3	0.216586	0.157641	0.216586	0.207201
1.31	0.202032	0.163091	0.202032	0.199702
1.32	0.200298	0.167818	0.200298	0.182139
1.33	0.211056	0.171887	0.211056	0.184423
1.34	0.225287	0.16784	0.225287	0.188453
1.35	0.22248	0.171684	0.22248	0.187418
1.36	0.236695	0.173981	0.236695	0.198028
1.37	0.250322	0.183125	0.250322	0.199868
1.38	0.234107	0.178416	0.234107	0.192372
1.39	0.23492	0.183505	0.23492	0.181728
1.4	0.229375	0.180162	0.229375	0.171154
1.41	0.225766	0.173221	0.225766	0.181777
1.42	0.236022	0.182814	0.236022	0.16786
1.43	0.225172	0.178872	0.225172	0.170437
1.44	0.220784	0.169849	0.220784	0.16961
1.45	0.230328	0.167777	0.230328	0.172168
1.46	0.220698	0.169661	0.220698	0.174148
1.47	0.221716	0.174234	0.221716	0.164958
1.48	0.221392	0.178216	0.221392	0.157375
1.49	0.236672	0.177813	0.236672	0.158098
1.5	0.228528	0.187926	0.228528	0.162362
1.51	0.235722	0.180671	0.235722	0.164942
1.52	0.233776	0.187851	0.233776	0.166832
1.53	0.221928	0.182844	0.221928	0.156429
1.54	0.219214	0.184596	0.219214	0.160135
1.55	0.226733	0.186762	0.226733	0.164605
1.56	0.22488	0.188682	0.22488	0.169721
1.57	0.228673	0.193901	0.228673	0.173755
1.58	0.226028	0.199685	0.226028	0.186576
1.59	0.238672	0.215909	0.238672	0.182246
1.6	0.243534	0.218896	0.243534	0.188161
1.61	0.218769	0.217823	0.218769	0.18944
1.62	0.230854	0.225032	0.230854	0.190485
1.63	0.22283	0.222119	0.22283	0.184986
1.64	0.23266	0.214979	0.23266	0.186134
1.65	0.230283	0.220364	0.230283	0.163356
1.66	0.222426	0.228215	0.222426	0.16209
1.67	0.22981	0.236329	0.22981	0.16229
1.68	0.222404	0.220823	0.222404	0.171197
1.69	0.226715	0.222615	0.226715	0.18111
1.7	0.240846	0.231036	0.240846	0.186443
1.71	0.232762	0.229483	0.232762	0.179911
1.72	0.229445	0.226776	0.229445	0.181468
1.73	0.233281	0.210816	0.233281	0.17881
1.74	0.228733	0.216786	0.228733	0.181261
1.75	0.218058	0.227438	0.218058	0.185447
1.76	0.231838	0.213668	0.231838	0.18586
1.77	0.243301	0.220392	0.243301	0.193758
1.78	0.246698	0.229894	0.246698	0.207264
1.79	0.233603	0.217579	0.233603	0.219236
1.8	0.242313	0.223066	0.242313	0.190329
1.81	0.241996	0.218296	0.241996	0.196455
1.82	0.229754	0.212592	0.229754	0.210597
1.83	0.232324	0.205226	0.232324	0.209851
1.84	0.247893	0.209346	0.247893	0.201789
1.85	0.25472	0.197392	0.25472	0.214726
1.86	0.255156	0.197403	0.255156	0.229015
1.87	0.243661	0.199823	0.243661	0.226892
1.88	0.256854	0.20176	0.256854	0.229274
1.89	0.24497	0.193392	0.24497	0.219962
1.9	0.242577	0.20553	0.242577	0.216985
1.91	0.239486	0.211873	0.239486	0.217256
1.92	0.241314	0.217505	0.241314	0.218229
1.93	0.226495	0.22272	0.226495	0.217084
1.94	0.225244	0.215987	0.225244	0.222602
1.95	0.220739	0.222999	0.220739	0.213354
1.96	0.226064	0.218471	0.226064	0.208488
1.97	0.228723	0.216994	0.228723	0.223319
1.98	0.224624	0.212357	0.224624	0.216713
1.99	0.237877	0.222639	0.237877	0.200955
2	0.239818	0.216503	0.239818	0.197447
2.01	0.238854	0.229042	0.238854	0.195108
2.02	0.238728	0.226856	0.238728	0.197481
2.03	0.243468	0.21882	0.243468	0.207241
2.04	0.237563	0.207206	0.237563	0.211125
2.05	0.259398	0.218271	0.259398	0.203756
2.06	0.254864	0.236817	0.254864	0.198359
2.07	0.255544	0.231968	0.255544	0.194071
2.08	0.249333	0.227432	0.249333	0.192494
2.09	0.263152	0.243341	0.263152	0.213637
2.1	0.267879	0.227069	0.267879	0.200391
2.11	0.270076	0.234631	0.270076	0.216785
2.12	0.283695	0.223063	0.283695	0.24014
2.13	0.289309	0.232786	0.289309	0.223465
2.14	0.280109	0.232324	0.280109	0.209486
2.15	0.272766	0.227366	0.272766	0.213562
2.16	0.265838	0.221669	0.265838	0.222833
2.17	0.275507	0.216607	0.275507	0.223431
2.18	0.276944	0.2185	0.276944	0.22455
2.19	0.283284	0.21689	0.283284	0.222207
2.2	0.28083	0.203627	0.28083	0.247883
2.21	0.268763	0.209661	0.268763	0.243667
2.22	0.273487	0.216072	0.273487	0.256379
2.23	0.256811	0.223593	0.256811	0.256514
2.24	0.252394	0.221177	0.252394	0.247351
2.25	0.257735	0.230557	0.257735	0.245856
2.26	0.262428	0.213603	0.262428	0.227884
2.27	0.250663	0.221147	0.250663	0.215143
2.28	0.256095	0.22969	0.256095	0.216765
2.29	0.263895	0.23456	0.263895	0.226181
2.3	0.257093	0.240833	0.257093	0.229867
2.31	0.251115	0.224145	0.251115	0.243259
2.32	0.267927	0.22803	0.267927	0.241425
2.33	0.266208	0.231398	0.266208	0.244676
2.34	0.263531	0.237877	0.263531	0.239695
2.35	0.26554	0.259076	0.26554	0.246078
2.36	0.264019	0.243675	0.264019	0.244115
2.37	0.254947	0.239878	0.254947	0.241858
2.38	0.245733	0.238935	0.245733	0.224942
2.39	0.262036	0.236922	0.262036	0.236865
2.4	0.258871	0.242117	0.258871	0.232965
2.41	0.260579	0.229799	0.260579	0.250761
2.42	0.277046	0.234924	0.277046	0.24301
2.43	0.286517	0.247055	0.286517	0.234668
2.44	0.303348	0.222459	0.303348	0.258455
2.45	0.293365	0.223005	0.293365	0.236857
2.46	0.296334	0.230032	0.296334	0.246733
2.47	0.295304	0.240734	0.295304	0.221739
2.48	0.303814	0.245336	0.303814	0.219052
2.49	0.297414	0.245001	0.297414	0.215257
2.5	0.299456	0.238583	0.299456	0.24744
2.51	0.293723	0.229831	0.293723	0.236661
2.52	0.288423	0.212949	0.288423	0.233438
2.53	0.296481	0.227118	0.296481	0.242489
2.54	0.281319	0.217051	0.281319	0.231882
2.55	0.284061	0.204614	0.284061	0.225716
2.56	0.282378	0.217354	0.282378	0.222345
2.57	0.306963	0.211743	0.306963	0.214857
2.58	0.288537	0.218065	0.288537	0.209671
2.59	0.289322	0.223181	0.289322	0.213531
2.6	0.287745	0.224273	0.287745	0.243496
2.61	0.301277	0.220656	0.301277	0.224833
2.62	0.297519	0.228162	0.297519	0.233082
2.63	0.281891	0.220807	0.281891	0.233295
2.64	0.276618	0.22295	0.276618	0.245349
2.65	0.278193	0.229545	0.278193	0.242404
2.66	0.292768	0.233301	0.292768	0.260165
2.67	0.303253	0.250572	0.303253	0.239859
2.68	0.311753	0.241742	0.311753	0.236511
2.69	0.316792	0.26705	0.316792	0.228665
2.7	0.305184	0.259279	0.305184	0.218387
2.71	0.313608	0.245945	0.313608	0.213618
2.72	0.303249	0.25022	0.303249	0.218164
2.73	0.293516	0.244677	0.293516	0.224515
2.74	0.276657	0.256249	0.276657	0.222824
2.75	0.272952	0.246029	0.272952	0.232446
2.76	0.28601	0.249846	0.28601	0.205975
2.77	0.276838	0.260458	0.276838	0.221763
2.78	0.287998	0.264547	0.287998	0.214682
2.79	0.310426	0.268739	0.310426	0.214706
2.8	0.300717	0.270201	0.300717	0.222659
2.81	0.281516	0.254063	0.281516	0.198985
2.82	0.286266	0.262761	0.286266	0.19235
2.83	0.298566	0.271344	0.298566	0.186963
2.84	0.301269	0.274324	0.301269	0.171601
2.85	0.309879	0.271707	0.309879	0.175323
2.86	0.301003	0.280955	0.301003	0.17919
2.87	0.304071	0.281363	0.304071	0.184314
2.88	0.301615	0.269878	0.301615	0.188795
2.89	0.312494	0.259574	0.312494	0.218284
2.9	0.305433	0.272074	0.305433	0.22581
2.91	0.309043	0.258253	0.309043	0.220754
2.92	0.306283	0.252362	0.306283	0.213739
2.93	0.312961	0.25814	0.312961	0.231774
2.94	0.308641	0.246934	0.308641	0.228328
2.95	0.310155	0.258922	0.310155	0.240378
2.96	0.311026	0.244517	0.311026	0.226671
2.97	0.307139	0.247053	0.307139	0.227338
2.98	0.313929	0.2331	0.313929	0.245012
2.99	0.299604	0.238347	0.299604	0.236779
3	0.29631	0.226045	0.29631	0.249634
3.01	0.304557	0.231241	0.304557	0.246845
3.02	0.292378	0.240823	0.292378	0.250445
3.03	0.298771	0.246942	0.298771	0.266796
3.04	0.310488	0.247267	0.310488	0.250767
3.05	0.318115	0.235145	0.318115	0.235855
3.06	0.307777	0.247402	0.307777	0.255876
3.07	0.309993	0.240521	0.309993	0.235447
3.08	0.302854	0.248059	0.302854	0.221731
3.09	0.302942	0.256526	0.302942	0.216239
3.1	0.300966	0.249996	0.300966	0.203339
3.11	0.287937	0.264014	0.287937	0.227272
3.12	0.295981	0.242442	0.295981	0.21819
3.13	0.303595	0.256067	0.303595	0.1981
3.14	0.302595	0.26913	0.302595	0.200602
3.15	0.29034	0.261787	0.29034	0.200656
3.16	0.266345	0.276288	0.266345	0.214485
3.17	0.281038	0.283984	0.281038	0.206559
3.18	0.271357	0.274623	0.271357	0.21518
3.19	0.285271	0.268508	0.285271	0.209141
3.2	0.279381	0.270807	0.279381	0.222116
3.21	0.292231	0.270591	0.292231	0.214621
3.22	0.285883	0.272399	0.285883	0.230821
3.23	0.285525	0.287816	0.285525	0.242611
3.24	0.284219	0.266235	0.284219	0.232434
3.25	0.277036	0.266654	0.277036	0.23824
3.26	0.274387	0.292309	0.274387	0.244944
3.27	0.293689	0.289148	0.293689	0.235764
3.28	0.268873	0.294264	0.268873	0.246452
3.29	0.26757	0.280751	0.26757	0.243092
3.3	0.263036	0.280371	0.263036	0.248095
3.31	0.28284	0.29163	0.28284	0.251663
3.32	0.286416	0.301521	0.286416	0.256472
3.33	0.298667	0.301469	0.298667	0.256457
3.34	0.293761	0.290712	0.293761	0.250256
3.35	0.288513	0.286677	0.288513	0.258934
3.36	0.282444	0.292658	0.282444	0.241226
3.37	0.282465	0.29118	0.282465	0.228236
3.38	0.274783	0.299933	0.274783	0.240154
3.39	0.285921	0.285481	0.285921	0.249287
3.4	0.293037	0.269749	0.293037	0.239521
3.41	0.295051	0.27613	0.295051	0.223533
3.42	0.303562	0.293367	0.303562	0.230433
3.43	0.303322	0.284359	0.303322	0.240449
3.44	0.297596	0.278507	0.297596	0.259699
3.45	0.297002	0.28549	0.297002	0.265998
3.46	0.286794	0.28479	0.286794	0.256263
3.47	0.306786	0.276603	0.306786	0.264354
3.48	0.322535	0.2682	0.322535	0.251146
3.49	0.309665	0.269371	0.309665	0.257949
3.5	0.314704	0.272557	0.314704	0.234418
3.51	0.317398	0.272855	0.317398	0.234481
3.52	0.315317	0.252704	0.315317	0.246094
3.53	0.312354	0.254653	0.312354	0.245601
3.54	0.31217	0.257869	0.31217	0.235163
3.55	0.323696	0.252755	0.323696	0.233934
3.56	0.317653	0.255889	0.317653	0.232061
3.57	0.351126	0.247954	0.351126	0.239395
3.58	0.34709	0.24135	0.34709	0.235698
3.59	0.348665	0.243778	0.348665	0.217668
3.6	0.343305	0.255796	0.343305	0.222129
3.61	0.342816	0.255182	0.342816	0.228941
3.62	0.330979	0.242144	0.330979	0.227677
3.63	0.337803	0.264592	0.337803	0.234915
3.64	0.336956	0.256806	0.336956	0.245808
3.65	0.338582	0.27639	0.338582	0.262571
3.66	0.346877	0.284612	0.346877	0.249124
3.67	0.337985	0.260969	0.337985	0.232877
3.68	0.321541	0.261294	0.321541	0.230117
3.69	0.339377	0.263382	0.339377	0.236058
3.7	0.333426	0.263616	0.333426	0.248173
3.71	0.323266	0.261304	0.323266	0.23699
3.72	0.334821	0.267812	0.334821	0.228593
3.73	0.35662	0.263645	0.35662	0.244111
3.74	0.34925	0.280506	0.34925	0.240234
3.75	0.354604	0.279073	0.354604	0.247407
3.76	0.333602	0.286185	0.333602	0.259245
3.77	0.322157	0.279707	0.322157	0.25092
3.78	0.327677	0.261127	0.327677	0.244859
3.79	0.330587	0.257952	0.330587	0.244726
3.8	0.334699	0.263265	0.334699	0.244339
3.81	0.329105	0.249252	0.329105	0.246433
3.82	0.335893	0.243411	0.335893	0.235478
3.83	0.341787	0.23819	0.341787	0.254971
3.84	0.33407	0.242088	0.33407	0.251365
3.85	0.35266	0.238094	0.35266	0.256153
3.86	0.353291	0.248494	0.353291	0.24276
3.87	0.343056	0.25081	0.343056	0.250146
3.88	0.341543	0.244932	0.341543	0.255651
3.89	0.341942	0.237976	0.341942	0.259138
3.9	0.339496	0.234349	0.339496	0.243356
3.91	0.342268	0.233566	0.342268	0.234751
3.92	0.320002	0.243006	0.320002	0.237164
3.93	0.327413	0.232214	0.327413	0.23193
3.94	0.335243	0.226863	0.335243	0.230147
3.95	0.333139	0.23748	0.333139	0.234958
3.96	0.315948	0.228298	0.315948	0.242896
3.97	0.309602	0.223617	0.309602	0.257
3.98	0.286441	0.226434	0.286441	0.246913
3.99	0.311359	0.229785	0.311359	0.224274
4	0.318602	0.238972	0.318602	0.225078
4.01	0.315929	0.225912	0.315929	0.226415
4.02	0.324123	0.231951	0.324123	0.224135
4.03	0.317033	0.23278	0.317033	0.204705
4.04	0.330383	0.219886	0.330383	0.21861
4.05	0.317531	0.236141	0.317531	0.216067
4.06	0.322592	0.226478	0.322592	0.243564
4.07	0.315276	0.223486	0.315276	0.253285
4.08	0.289248	0.216344	0.289248	0.26932
4.09	0.290134	0.224048	0.290134	0.25027
4.1	0.286752	0.238985	0.286752	0.233287
4.11	0.288724	0.222204	0.288724	0.246098
4.12	0.309887	0.224929	0.309887	0.243777
4.13	0.319759	0.210224	0.319759	0.252979
4.14	0.305397	0.223027	0.305397	0.252344
4.15	0.305855	0.222724	0.305855	0.25696
4.16	0.29641	0.229737	0.29641	0.247363
4.17	0.293459	0.231197	0.293459	0.264092
4.18	0.317351	0.23333	0.317351	0.251565
4.19	0.309352	0.257057	0.309352	0.236504
4.2	0.299954	0.241369	0.299954	0.232925
4.21	0.306153	0.242492	0.306153	0.249755
4.22	0.306605	0.257985	0.306605	0.239141
4.23	0.317119	0.24356	0.317119	0.25462
4.24	0.298679	0.24506	0.298679	0.239766
4.25	0.320202	0.236973	0.320202	0.243622
4.26	0.302379	0.238276	0.302379	0.26191
4.27	0.313541	0.240208	0.313541	0.25633
4.28	0.304362	0.23173	0.304362	0.247153
4.29	0.308975	0.231877	0.308975	0.268968
4.3	0.297528	0.230399	0.297528	0.261042
4.31	0.295646	0.230079	0.295646	0.249367
4.32	0.308021	0.249405	0.308021	0.261734
4.33	0.315991	0.248727	0.315991	0.267695
4.34	0.327161	0.252134	0.327161	0.263491
4.35	0.327032	0.245675	0.327032	0.262132
4.36	0.317205	0.236171	0.317205	0.268089
4.37	0.317773	0.236211	0.317773	0.268812
4.38	0.333979	0.234251	0.333979	0.273207
4.39	0.312885	0.236695	0.312885	0.268607
4.4	0.324384	0.24569	0.324384	0.242693
4.41	0.325582	0.236521	0.325582	0.242858
4.42	0.316727	0.250388	0.316727	0.244877
4.43	0.310152	0.253954	0.310152	0.253463
4.44	0.315203	0.242487	0.315203	0.243193
4.45	0.306336	0.245657	0.306336	0.249334
4.46	0.303797	0.238125	0.303797	0.254962
4.47	0.291687	0.241135	0.291687	0.261227
4.48	0.275312	0.256672	0.275312	0.277554
4.49	0.281813	0.250656	0.281813	0.267031
4.5	0.278845	0.26045	0.278845	0.246876
4.51	0.293236	0.247663	0.293236	0.249661
4.52	0.302161	0.256785	0.302161	0.251861
4.53	0.289488	0.249679	0.289488	0.241665
4.54	0.28637	0.250427	0.28637	0.233804
4.55	0.287202	0.243917	0.287202	0.239513
4.56	0.288448	0.259651	0.288448	0.225969
4.57	0.29409	0.263301	0.29409	0.241404
4.58	0.293909	0.246059	0.293909	0.245363
4.59	0.296021	0.245667	0.296021	0.240667
4.6	0.310214	0.244561	0.310214	0.229499
4.61	0.29404	0.246262	0.29404	0.245723
4.62	0.302949	0.238161	0.302949	0.241448
4.63	0.292633	0.238272	0.292633	0.242968
4.64	0.282816	0.233772	0.282816	0.239311
4.65	0.289325	0.249179	0.289325	0.249608
4.66	0.300943	0.249433	0.300943	0.268967
4.67	0.284293	0.247004	0.284293	0.255223
4.68	0.296214	0.239184	0.296214	0.256202
4.69	0.28428	0.23785	0.28428	0.265931
4.7	0.304655	0.237766	0.304655	0.266361
4.71	0.300706	0.243204	0.300706	0.24124
4.72	0.285272	0.255499	0.285272	0.23968
4.73	0.29774	0.259014	0.29774	0.25034
4.74	0.290184	0.245899	0.290184	0.279925
4.75	0.285982	0.244579	0.285982	0.281801
4.76	0.294394	0.24324	0.294394	0.276968
4.77	0.301065	0.240812	0.301065	0.273173
4.78	0.307453	0.245122	0.307453	0.281179
4.79	0.301204	0.241314	0.301204	0.275216
4.8	0.309829	0.25711	0.309829	0.282677
4.81	0.291864	0.254195	0.291864	0.296464
4.82	0.295459	0.245942	0.295459	0.280264
4.83	0.306878	0.240832	0.306878	0.29123
4.84	0.310952	0.239682	0.310952	0.293989
4.85	0.31333	0.237467	0.31333	0.281882
4.86	0.304225	0.237564	0.304225	0.287629
4.87	0.289811	0.244554	0.289811	0.284182
4.88	0.282968	0.238649	0.282968	0.283562
4.89	0.283287	0.218918	0.283287	0.280664
4.9	0.274775	0.222857	0.274775	0.28731
4.91	0.288353	0.227587	0.288353	0.283491
4.92	0.277064	0.219886	0.277064	0.279307
4.93	0.2841	0.218359	0.2841	0.277025
4.94	0.278168	0.227141	0.278168	0.264281
4.95	0.275857	0.233488	0.275857	0.256449
4.96	0.292486	0.241777	0.292486	0.262781
4.97	0.294187	0.247602	0.294187	0.2593
4.98	0.302451	0.248688	0.302451	0.246358
4.99	0.314899	0.22893	0.314899	0.253365
5	0.325036	0.234891	0.325036	0.263837
5.01	0.332811	0.240804	0.332811	0.239641
5.02	0.341661	0.234748	0.341661	0.238507
5.03	0.34474	0.224789	0.34474	0.246595
5.04	0.342147	0.226181	0.342147	0.248707
5.05	0.330679	0.224238	0.330679	0.262122
5.06	0.320935	0.225888	0.320935	0.266101
5.07	0.32111	0.227404	0.32111	0.266532
5.08	0.335222	0.225359	0.335222	0.275489
5.09	0.309029	0.231642	0.309029	0.2643
5.1	0.30745	0.241675	0.30745	0.251404
5.11	0.318803	0.242279	0.318803	0.245754
5.12	0.308586	0.243033	0.308586	0.245363
5.13	0.290852	0.233996	0.290852	0.248999
5.14	0.296102	0.224751	0.296102	0.252793
5.15	0.301432	0.232015	0.301432	0.25284
5.16	0.316699	0.238062	0.316699	0.269627
5.17	0.315687	0.235346	0.315687	0.27031
5.18	0.314727	0.239019	0.314727	0.270459
5.19	0.32901	0.256044	0.32901	0.253544
5.2	0.331423	0.254536	0.331423	0.255911
5.21	0.315014	0.245901	0.315014	0.251603
5.22	0.325359	0.253269	0.325359	0.255995
5.23	0.324891	0.251389	0.324891	0.270222
5.24	0.324885	0.240144	0.324885	0.273636
5.25	0.321227	0.243123	0.321227	0.266717
5.26	0.332708	0.242446	0.332708	0.268603
5.27	0.324183	0.248243	0.324183	0.270184
5.28	0.314992	0.243381	0.314992	0.264669
5.29	0.307102	0.237492	0.307102	0.26973
5.3	0.296626	0.243893	0.296626	0.275438
5.31	0.288431	0.257471	0.288431	0.279527
5.32	0.295034	0.264158	0.295034	0.268027
5.33	0.300364	0.265191	0.300364	0.277444
5.34	0.300084	0.27175	0.300084	0.273188
5.35	0.296241	0.271708	0.296241	0.301481
5.36	0.295148	0.261169	0.295148	0.295542
5.37	0.296769	0.251989	0.296769	0.28665
5.38	0.27937	0.262607	0.27937	0.28683
5.39	0.293189	0.246966	0.293189	0.292296
5.4	0.284035	0.247374	0.284035	0.283133
5.41	0.28563	0.243919	0.28563	0.278543
5.42	0.296528	0.237969	0.296528	0.266244
5.43	0.30388	0.231393	0.30388	0.263081
5.44	0.289745	0.234904	0.289745	0.26385
5.45	0.292513	0.237437	0.292513	0.260014
5.46	0.28866	0.236284	0.28866	0.269851
5.47	0.279313	0.251623	0.279313	0.275042
5.48	0.27606	0.262005	0.27606	0.273986
5.49	0.280917	0.265585	0.280917	0.289961
5.5	0.268826	0.262641	0.268826	0.295906
5.51	0.265375	0.25571	0.265375	0.296693
5.52	0.271813	0.245667	0.271813	0.302417
5.53	0.278296	0.262042	0.278296	0.305706
5.54	0.280033	0.260594	0.280033	0.30551
5.55	0.272866	0.260921	0.272866	0.317752
5.56	0.266777	0.253408	0.266777	0.331645
5.57	0.272498	0.24835	0.272498	0.330045
5.58	0.276539	0.256186	0.276539	0.326517
5.59	0.27188	0.24133	0.27188	0.331057
5.6	0.282008	0.258891	0.282008	0.338335
5.61	0.283121	0.275323	0.283121	0.326981
5.62	0.271274	0.273553	0.271274	0.328459
5.63	0.284245	0.273283	0.284245	0.314486
5.64	0.300234	0.259701	0.300234	0.300558
5.65	0.289011	0.271098	0.289011	0.308425
5.66	0.30384	0.259668	0.30384	0.310712
5.67	0.297764	0.270465	0.297764	0.300509
5.68	0.314996	0.271511	0.314996	0.300847
5.69	0.315403	0.257817	0.315403	0.311035
5.7	0.308379	0.251904	0.308379	0.307951
5.71	0.311105	0.244522	0.311105	0.299327
5.72	0.30742	0.266048	0.30742	0.302575
5.73	0.301599	0.272219	0.301599	0.286859
5.74	0.297783	0.255887	0.297783	0.287772
5.75	0.309264	0.261577	0.309264	0.294341
5.76	0.329387	0.270427	0.329387	0.302891
5.77	0.325133	0.266286	0.325133	0.31628
5.78	0.32634	0.239237	0.32634	0.329095
5.79	0.32574	0.22813	0.32574	0.344055
5.8	0.309965	0.239359	0.309965	0.329615
5.81	0.297182	0.236865	0.297182	0.339471
5.82	0.311717	0.248397	0.311717	0.340089
5.83	0.297638	0.238728	0.297638	0.341003
5.84	0.318255	0.24345	0.318255	0.337193
5.85	0.31348	0.273322	0.31348	0.326288
5.86	0.300158	0.260739	0.300158	0.32002
5.87	0.308062	0.26138	0.308062	0.322981
5.88	0.310737	0.261464	0.310737	0.314414
5.89	0.321379	0.263078	0.321379	0.32124
5.9	0.318038	0.269734	0.318038	0.334419
5.91	0.320528	0.254717	0.320528	0.329105
5.92	0.313715	0.258249	0.313715	0.314831
5.93	0.310973	0.249461	0.310973	0.328146
5.94	0.302203	0.215131	0.302203	0.326611
5.95	0.303475	0.223268	0.303475	0.322802
5.96	0.306305	0.230415	0.306305	0.328871
5.97	0.323876	0.237577	0.323876	0.338019
5.98	0.318166	0.231746	0.318166	0.326311
5.99	0.312953	0.232161	0.312953	0.30529
6	0.310806	0.245446	0.310806	0.304938
6.01	0.318638	0.235312	0.318638	0.315638
6.02	0.312581	0.238276	0.312581	0.315064
6.03	0.313514	0.231411	0.313514	0.309823
6.04	0.316888	0.23667	0.316888	0.313621
6.05	0.301158	0.242828	0.301158	0.321639
6.06	0.308941	0.226475	0.308941	0.314117
6.07	0.318321	0.233931	0.318321	0.299337
6.08	0.31328	0.235753	0.31328	0.306538
6.09	0.296455	0.238394	0.296455	0.32149
6.1	0.306328	0.229046	0.306328	0.338519
6.11	0.306476	0.231451	0.306476	0.323555
6.12	0.323154	0.254294	0.323154	0.310059
6.13	0.313414	0.245097	0.313414	0.31847
6.14	0.320727	0.244014	0.320727	0.309789
6.15	0.310946	0.242532	0.310946	0.319317
6.16	0.312265	0.269996	0.312265	0.308753
6.17	0.299864	0.267856	0.299864	0.301422
6.18	0.306808	0.255028	0.306808	0.314054
6.19	0.300306	0.245778	0.300306	0.298718
6.2	0.289646	0.262914	0.289646	0.300461
6.21	0.298803	0.257257	0.298803	0.305418
6.22	0.311372	0.256379	0.311372	0.318555
6.23	0.318846	0.265271	0.318846	0.302148
6.24	0.298533	0.260999	0.298533	0.298277
6.25	0.298471	0.252899	0.298471	0.31068
6.26	0.298273	0.244592	0.298273	0.298165
6.27	0.308862	0.242763	0.308862	0.306673
6.28	0.300397	0.2517	0.300397	0.319331
6.29	0.31446	0.259386	0.31446	0.298647
6.3	0.321985	0.25086	0.321985	0.301001
6.31	0.325568	0.259043	0.325568	0.311472
6.32	0.338142	0.261395	0.338142	0.328711
6.33	0.335748	0.25713	0.335748	0.319556
6.34	0.329424	0.254686	0.329424	0.311085
6.35	0.331307	0.249962	0.331307	0.313831
6.36	0.321414	0.240816	0.321414	0.31345
6.37	0.332189	0.251775	0.332189	0.326874
6.38	0.328943	0.235683	0.328943	0.321651
6.39	0.338266	0.238233	0.338266	0.320033
6.4	0.329814	0.240652	0.329814	0.314362
6.41	0.334576	0.242488	0.334576	0.310058
6.42	0.337885	0.241311	0.337885	0.309455
6.43	0.326676	0.237057	0.326676	0.302772
6.44	0.333636	0.218428	0.333636	0.306408
6.45	0.328058	0.240742	0.328058	0.289356
6.46	0.32883	0.251997	0.32883	0.308178
6.47	0.324009	0.241321	0.324009	0.294849
6.48	0.316987	0.246542	0.316987	0.305172
6.49	0.312057	0.237797	0.312057	0.305497
6.5	0.317462	0.250144	0.317462	0.311259
6.51	0.309932	0.23635	0.309932	0.309371
6.52	0.313625	0.251119	0.313625	0.293353
6.53	0.325821	0.26966	0.325821	0.286326
6.54	0.328651	0.250891	0.328651	0.293686
6.55	0.316433	0.263149	0.316433	0.295832
6.56	0.323109	0.267939	0.323109	0.313909
6.57	0.321794	0.261155	0.321794	0.306536
6.58	0.311501	0.275174	0.311501	0.314536
6.59	0.317935	0.26921	0.317935	0.312083
6.6	0.327539	0.258537	0.327539	0.306941
6.61	0.318901	0.262496	0.318901	0.313884
6.62	0.321973	0.264453	0.321973	0.316256
6.63	0.34085	0.26343	0.34085	0.308996
6.64	0.325989	0.268046	0.325989	0.299318
6.65	0.332541	0.288788	0.332541	0.288319
6.66	0.326742	0.277595	0.326742	0.276587
6.67	0.336305	0.271848	0.336305	0.269176
6.68	0.362965	0.279339	0.362965	0.258399
6.69	0.358157	0.281477	0.358157	0.265265
6.7	0.368276	0.29004	0.368276	0.25019
6.71	0.371391	0.302145	0.371391	0.272819
6.72	0.366889	0.277225	0.366889	0.254711
6.73	0.364605	0.289535	0.364605	0.250521
6.74	0.369735	0.297458	0.369735	0.252134
6.75	0.374925	0.292767	0.374925	0.249358
6.76	0.381968	0.278604	0.381968	0.2581
6.77	0.370583	0.270529	0.370583	0.27642
6.78	0.356784	0.285484	0.356784	0.291342
6.79	0.359305	0.282151	0.359305	0.304042
6.8	0.352779	0.276688	0.352779	0.316812
6.81	0.357416	0.27607	0.357416	0.312148
6.82	0.3602	0.287172	0.3602	0.301078
6.83	0.366468	0.277651	0.366468	0.295653
6.84	0.353753	0.264225	0.353753	0.283941
6.85	0.362483	0.279805	0.362483	0.270906
6.86	0.366065	0.273877	0.366065	0.27849
6.87	0.359847	0.278515	0.359847	0.261965
6.88	0.350052	0.287376	0.350052	0.271152
6.89	0.364184	0.279731	0.364184	0.284241
6.9	0.353122	0.284099	0.353122	0.272847
6.91	0.370365	0.281271	0.370365	0.274371
6.92	0.386708	0.288681	0.386708	0.278544
6.93	0.377241	0.298281	0.377241	0.275991
6.94	0.377825	0.285776	0.377825	0.285663
6.95	0.361441	0.283129	0.361441	0.27505
6.96	0.360082	0.262308	0.360082	0.26846
6.97	0.362016	0.265342	0.362016	0.273056
6.98	0.365945	0.275535	0.365945	0.254314
6.99	0.361746	0.286282	0.361746	0.245844
7	0.352165	0.295459	0.352165	0.24183
7.01	0.351646	0.265618	0.351646	0.222398
7.02	0.35247	0.285123	0.35247	0.231468
7.03	0.345637	0.296114	0.345637	0.233923
7.04	0.345509	0.288206	0.345509	0.227061
7.05	0.33811	0.289741	0.33811	0.240369
7.06	0.334277	0.276579	0.334277	0.26153
7.07	0.336173	0.290237	0.336173	0.287794
7.08	0.3259	0.288749	0.3259	0.278591
7.09	0.33468	0.286809	0.33468	0.272299
7.1	0.356674	0.289608	0.356674	0.274062
7.11	0.361781	0.290545	0.361781	0.269535
7.12	0.364862	0.289244	0.364862	0.281928
7.13	0.357066	0.294447	0.357066	0.296265
7.14	0.355911	0.281443	0.355911	0.290236
7.15	0.362218	0.279126	0.362218	0.271075
7.16	0.367208	0.287592	0.367208	0.265851
7.17	0.363975	0.279001	0.363975	0.274769
7.18	0.367	0.267972	0.367	0.27462
7.19	0.36438	0.274293	0.36438	0.283426
7.2	0.354009	0.278162	0.354009	0.281999
7.21	0.349237	0.258009	0.349237	0.295521
7.22	0.349055	0.260836	0.349055	0.300931
7.23	0.360189	0.285701	0.360189	0.316943
7.24	0.354852	0.270714	0.354852	0.316847
7.25	0.358464	0.274179	0.358464	0.309818
7.26	0.348327	0.273201	0.348327	0.299153
7.27	0.33458	0.282678	0.33458	0.292545
7.28	0.347043	0.277788	0.347043	0.305663
7.29	0.356936	0.283322	0.356936	0.292163
7.3	0.354094	0.286304	0.354094	0.280618
7.31	0.362782	0.27585	0.362782	0.285181
7.32	0.361527	0.281189	0.361527	0.28921
7.33	0.364235	0.285323	0.364235	0.277926
7.34	0.354473	0.28859	0.354473	0.283271
7.35	0.352202	0.302121	0.352202	0.282012
7.36	0.351108	0.292493	0.351108	0.278041
7.37	0.365306	0.270786	0.365306	0.28055
7.38	0.366543	0.265834	0.366543	0.292192
7.39	0.360202	0.268221	0.360202	0.271024
7.4	0.371566	0.276332	0.371566	0.285452
7.41	0.376797	0.28268	0.376797	0.306777
7.42	0.370965	0.277479	0.370965	0.307539
7.43	0.378702	0.293714	0.378702	0.302564
7.44	0.38613	0.284453	0.38613	0.29031
7.45	0.384297	0.286675	0.384297	0.296809
7.46	0.382952	0.290443	0.382952	0.304755
7.47	0.381779	0.291442	0.381779	0.31349
7.48	0.389026	0.290638	0.389026	0.313256
7.49	0.383362	0.284405	0.383362	0.308891
7.5	0.396862	0.281598	0.396862	0.297487
7.51	0.395708	0.29148	0.395708	0.2808
7.52	0.398721	0.291803	0.398721	0.273333
7.53	0.406631	0.283751	0.406631	0.300176
7.54	0.411779	0.293896	0.411779	0.285407
7.55	0.403569	0.301441	0.403569	0.276807
7.56	0.406251	0.299049	0.406251	0.276323
7.57	0.400876	0.288643	0.400876	0.27729
7.58	0.409346	0.291639	0.409346	0.2995
7.59	0.415192	0.29186	0.415192	0.30258
7.6	0.403555	0.296817	0.403555	0.294707
7.61	0.399389	0.294289	0.399389	0.279262
7.62	0.402889	0.303902	0.402889	0.283917
7.63	0.40024	0.282797	0.40024	0.29548
7.64	0.400871	0.271552	0.400871	0.281089
7.65	0.396918	0.278515	0.396918	0.28079
7.66	0.402578	0.277608	0.402578	0.294801
7.67	0.395774	0.271448	0.395774	0.26911
7.68	0.392677	0.268867	0.392677	0.270807
7.69	0.391732	0.261502	0.391732	0.273601
7.7	0.38667	0.27878	0.38667	0.284014
7.71	0.386297	0.275115	0.386297	0.306429
7.72	0.389732	0.290679	0.389732	0.293788
7.73	0.383897	0.283942	0.383897	0.288643
7.74	0.394301	0.299553	0.394301	0.294824
7.75	0.383396	0.278682	0.383396	0.298933
7.76	0.388606	0.275893	0.388606	0.312053
7.77	0.380844	0.285305	0.380844	0.290225
7.78	0.390929	0.267142	0.390929	0.315589
7.79	0.382582	0.282934	0.382582	0.308555
7.8	0.394425	0.263259	0.394425	0.33198
7.81	0.39177	0.265174	0.39177	0.3425
7.82	0.389016	0.266522	0.389016	0.319234
7.83	0.405299	0.258652	0.405299	0.319909
7.84	0.408942	0.257373	0.408942	0.322314
7.85	0.415997	0.264854	0.415997	0.349843
7.86	0.411475	0.2619	0.411475	0.337092
7.87	0.418668	0.259164	0.418668	0.363672
7.88	0.402531	0.260197	0.402531	0.346143
7.89	0.41563	0.265445	0.41563	0.346668
7.9	0.412427	0.272545	0.412427	0.330393
7.91	0.397571	0.274104	0.397571	0.326836
7.92	0.392943	0.281678	0.392943	0.339499
7.93	0.389548	0.262668	0.389548	0.33243
7.94	0.375495	0.268478	0.375495	0.349119
7.95	0.389099	0.254864	0.389099	0.328702
7.96	0.383171	0.261125	0.383171	0.336033
7.97	0.376359	0.261029	0.376359	0.357181
7.98	0.390256	0.265746	0.390256	0.363279
7.99	0.40203	0.273862	0.40203	0.360081
8	0.399656	0.259986	0.399656	0.35048
8.01	0.399594	0.267093	0.399594	0.35399
8.02	0.40212	0.276902	0.40212	0.36336
8.03	0.403541	0.261361	0.403541	0.353629
8.04	0.386547	0.261238	0.386547	0.339089
8.05	0.394705	0.264615	0.394705	0.339409
8.06	0.399441	0.261358	0.399441	0.345373
8.07	0.401322	0.280533	0.401322	0.312924
8.08	0.383651	0.269185	0.383651	0.336878
8.09	0.379481	0.280335	0.379481	0.325688
8.1	0.379971	0.289592	0.379971	0.314312
8.11	0.391283	0.277764	0.391283	0.313565
8.12	0.390063	0.276838	0.390063	0.317471
8.13	0.387297	0.27324	0.387297	0.332525
8.14	0.399058	0.256803	0.399058	0.340217
8.15	0.38412	0.28031	0.38412	0.341324
8.16	0.397376	0.273504	0.397376	0.334829
8.17	0.394506	0.269459	0.394506	0.34532
8.18	0.381366	0.272473	0.381366	0.33446
8.19	0.393157	0.288179	0.393157	0.328267
8.2	0.395986	0.293689	0.395986	0.319962
8.21	0.379987	0.278909	0.379987	0.316944
8.22	0.385687	0.285689	0.385687	0.32299
8.23	0.383175	0.289945	0.383175	0.316819
8.24	0.377841	0.281144	0.377841	0.321403
8.25	0.382091	0.27633	0.382091	0.324543
8.26	0.393207	0.274997	0.393207	0.322008
8.27	0.391822	0.275042	0.391822	0.322499
8.28	0.400358	0.272116	0.400358	0.320949
8.29	0.391794	0.279798	0.391794	0.304805
8.3	0.382231	0.287404	0.382231	0.314335
8.31	0.380877	0.279212	0.380877	0.318474
8.32	0.385553	0.29352	0.385553	0.315095
8.33	0.371875	0.291556	0.371875	0.319562
8.34	0.369955	0.275737	0.369955	0.33054
8.35	0.382257	0.272556	0.382257	0.348773
8.36	0.374807	0.258889	0.374807	0.340045
8.37	0.38703	0.265409	0.38703	0.345416
8.38	0.391442	0.277425	0.391442	0.332931
8.39	0.383815	0.262748	0.383815	0.337033
8.4	0.371217	0.27226	0.371217	0.336833
8.41	0.392367	0.285053	0.392367	0.342152
8.42	0.406423	0.277912	0.406423	0.311672
8.43	0.414221	0.274303	0.414221	0.315652
8.44	0.415292	0.300137	0.415292	0.329383
8.45	0.418633	0.285533	0.418633	0.335746
8.46	0.406577	0.282666	0.406577	0.317132
8.47	0.413491	0.281398	0.413491	0.332127
8.48	0.411954	0.279966	0.411954	0.334503
8.49	0.401604	0.284861	0.401604	0.331335
8.5	0.407517	0.281709	0.407517	0.320448
8.51	0.394858	0.2938	0.394858	0.343034
8.52	0.386988	0.282208	0.386988	0.34163
8.53	0.397332	0.288487	0.397332	0.343143
8.54	0.411245	0.280478	0.411245	0.361547
8.55	0.422603	0.300603	0.422603	0.383435
8.56	0.417663	0.289256	0.417663	0.370184
8.57	0.430719	0.293341	0.430719	0.356261
8.58	0.443758	0.291024	0.443758	0.362081
8.59	0.445723	0.291813	0.445723	0.356612
8.6	0.445225	0.287914	0.445225	0.335597
8.61	0.437142	0.287295	0.437142	0.338597
8.62	0.426257	0.295472	0.426257	0.34198
8.63	0.4033	0.305852	0.4033	0.325761
8.64	0.413848	0.307666	0.413848	0.334807
8.65	0.406015	0.319791	0.406015	0.335969
8.66	0.404075	0.321501	0.404075	0.358536
8.67	0.415683	0.305048	0.415683	0.365654
8.68	0.400472	0.309619	0.400472	0.365585
8.69	0.409838	0.315023	0.409838	0.365285
8.7	0.408024	0.309115	0.408024	0.350541
8.71	0.398757	0.313636	0.398757	0.356113
8.72	0.385653	0.317138	0.385653	0.349714
8.73	0.402606	0.310855	0.402606	0.331125
8.74	0.385172	0.31603	0.385172	0.348688
8.75	0.365025	0.326751	0.365025	0.343028
8.76	0.372924	0.361842	0.372924	0.353328
8.77	0.365821	0.352363	0.365821	0.364525
8.78	0.373708	0.357138	0.373708	0.365946
8.79	0.367475	0.337926	0.367475	0.377632
8.8	0.371966	0.331699	0.371966	0.37291
8.81	0.358703	0.319293	0.358703	0.379644
8.82	0.361945	0.354131	0.361945	0.396925
8.83	0.374352	0.336628	0.374352	0.382302
8.84	0.371944	0.353281	0.371944	0.388218
8.85	0.366122	0.339156	0.366122	0.38322
8.86	0.381075	0.350483	0.381075	0.369928
8.87	0.380224	0.329769	0.380224	0.376949
8.88	0.382105	0.330423	0.382105	0.375954
8.89	0.387458	0.318124	0.387458	0.378364
8.9	0.380379	0.301531	0.380379	0.380057
8.91	0.363938	0.298158	0.363938	0.388128
8.92	0.360349	0.302777	0.360349	0.382037
8.93	0.367393	0.308031	0.367393	0.354831
8.94	0.357228	0.291882	0.357228	0.339996
8.95	0.349435	0.312939	0.349435	0.351601
8.96	0.360533	0.313081	0.360533	0.347664
8.97	0.367624	0.300912	0.367624	0.348995
8.98	0.368845	0.303679	0.368845	0.348578
8.99	0.393717	0.303672	0.393717	0.360716
9	0.403092	0.319205	0.403092	0.364288
9.01	0.40099	0.309896	0.40099	0.354088
9.02	0.423875	0.318639	0.423875	0.352088
9.03	0.410833	0.31257	0.410833	0.341404
9.04	0.405415	0.294427	0.405415	0.34791
9.05	0.419485	0.301559	0.419485	0.354624
9.06	0.412293	0.298571	0.412293	0.356025
9.07	0.397526	0.309647	0.397526	0.345838
9.08	0.41289	0.310617	0.41289	0.353781
9.09	0.393535	0.283393	0.393535	0.326018
9.1	0.394024	0.282412	0.394024	0.334402
9.11	0.394374	0.274559	0.394374	0.32717
9.12	0.400278	0.263725	0.400278	0.325497
9.13	0.423125	0.259246	0.423125	0.333248
9.14	0.409187	0.263014	0.409187	0.316822
9.15	0.418723	0.260646	0.418723	0.294451
9.16	0.419286	0.276637	0.419286	0.316768
9.17	0.410233	0.266462	0.410233	0.317974
9.18	0.416162	0.261842	0.416162	0.317793
9.19	0.407667	0.277728	0.407667	0.337172
9.2	0.40959	0.266582	0.40959	0.333917
9.21	0.40516	0.27533	0.40516	0.33715
9.22	0.433957	0.257191	0.433957	0.355859
9.23	0.432508	0.252924	0.432508	0.342481
9.24	0.425426	0.250553	0.425426	0.327347
9.25	0.422285	0.243007	0.422285	0.322798
9.26	0.395349	0.250995	0.395349	0.345713
9.27	0.394656	0.236491	0.394656	0.354746
9.28	0.395464	0.250541	0.395464	0.343259
9.29	0.39404	0.253067	0.39404	0.366506
9.3	0.409181	0.236567	0.409181	0.386551
9.31	0.416127	0.240656	0.416127	0.37221
9.32	0.399674	0.223141	0.399674	0.377574
9.33	0.403261	0.240413	0.403261	0.367938
9.34	0.409919	0.239298	0.409919	0.3826
9.35	0.405497	0.251093	0.405497	0.370326
9.36	0.41933	0.259732	0.41933	0.357081
9.37	0.389186	0.273845	0.389186	0.356775
9.38	0.392996	0.256404	0.392996	0.339788
9.39	0.386808	0.264395	0.386808	0.355429
9.4	0.375717	0.266052	0.375717	0.356044
9.41	0.386064	0.259315	0.386064	0.358618
9.42	0.366814	0.261341	0.366814	0.366349
9.43	0.378353	0.259996	0.378353	0.352662
9.44	0.380517	0.277729	0.380517	0.358591
9.45	0.368783	0.268783	0.368783	0.359665
9.46	0.363112	0.262271	0.363112	0.362516
9.47	0.371413	0.270092	0.371413	0.386072
9.48	0.378394	0.272192	0.378394	0.38625
9.49	0.370663	0.304748	0.370663	0.37492
9.5	0.373782	0.29411	0.373782	0.362064
9.51	0.365495	0.29071	0.365495	0.354305
9.52	0.352556	0.29659	0.352556	0.36163
9.53	0.351265	0.304314	0.351265	0.366066
9.54	0.360855	0.293116	0.360855	0.370578
9.55	0.346823	0.275318	0.346823	0.353001
9.56	0.341484	0.276191	0.341484	0.344572
9.57	0.338233	0.282873	0.338233	0.345761
9.58	0.333993	0.288603	0.333993	0.357202
9.59	0.339664	0.295993	0.339664	0.353751
9.6	0.331301	0.303843	0.331301	0.386573
9.61	0.329541	0.290852	0.329541	0.391161
9.62	0.335026	0.278371	0.335026	0.395515
9.63	0.34233	0.276097	0.34233	0.388386
9.64	0.337334	0.269229	0.337334	0.407389
9.65	0.345629	0.263437	0.345629	0.41905
9.66	0.36364	0.265491	0.36364	0.427714
9.67	0.368148	0.253805	0.368148	0.43774
9.68	0.359225	0.255828	0.359225	0.426621
9.69	0.368658	0.264856	0.368658	0.41828
9.7	0.364291	0.262896	0.364291	0.421644
9.71	0.365158	0.273711	0.365158	0.424505
9.72	0.354005	0.274524	0.354005	0.444273
9.73	0.350878	0.280985	0.350878	0.444204
9.74	0.343303	0.277464	0.343303	0.441658
9.75	0.338434	0.285107	0.338434	0.441773
9.76	0.344783	0.267481	0.344783	0.443492
9.77	0.334154	0.281125	0.334154	0.441923
9.78	0.3423	0.283159	0.3423	0.463921
9.79	0.344635	0.287073	0.344635	0.443818
9.8	0.344075	0.270057	0.344075	0.445782
9.81	0.356046	0.277356	0.356046	0.439763
9.82	0.347377	0.282413	0.347377	0.442229
9.83	0.347328	0.297818	0.347328	0.457864
9.84	0.338598	0.269507	0.338598	0.434911
9.85	0.347437	0.281072	0.347437	0.441353
9.86	0.350925	0.284961	0.350925	0.432957
9.87	0.356565	0.290595	0.356565	0.419799
9.88	0.369757	0.279047	0.369757	0.416696
9.89	0.365625	0.276716	0.365625	0.404168
9.9	0.360532	0.282438	0.360532	0.415792
9.91	0.363187	0.275492	0.363187	0.408103
9.92	0.354432	0.290532	0.354432	0.393917
9.93	0.355782	0.287897	0.355782	0.390079
9.94	0.351481	0.286419	0.351481	0.391951
9.95	0.35521	0.292726	0.35521	0.417895
9.96	0.346977	0.291835	0.346977	0.429
9.97	0.386399	0.284208	0.386399	0.393793
9.98	0.404661	0.286248	0.404661	0.393949
9.99	0.401107	0.288017	0.401107	0.396692
10	0.395249	0.297723	0.395249	0.374312
10.01	0.374312	0.28234	0.374312	0.391913
10.02	0.35604	0.292862	0.35604	0.383802
10.03	0.379054	0.30045	0.379054	0.385416
10.04	0.382031	0.285627	0.382031	0.386721
10.05	0.387523	0.279012	0.387523	0.401638
10.06	0.38116	0.29297	0.38116	0.392419
10.07	0.380735	0.294633	0.380735	0.381731
10.08	0.364407	0.316658	0.364407	0.359783
10.09	0.369043	0.311693	0.369043	0.37077
10.1	0.381404	0.292327	0.381404	0.363999
10.11	0.374444	0.301798	0.374444	0.34584
10.12	0.369645	0.297363	0.369645	0.354845
10.13	0.353928	0.312083	0.353928	0.334132
10.14	0.346608	0.309501	0.346608	0.365072
10.15	0.34816	0.288565	0.34816	0.383072
10.16	0.347044	0.294049	0.347044	0.373253
10.17	0.348055	0.299234	0.348055	0.411736
10.18	0.346722	0.301926	0.346722	0.414637
10.19	0.33478	0.30428	0.33478	0.413664
10.2	0.342219	0.310758	0.342219	0.413235
10.21	0.355951	0.311752	0.355951	0.426092
10.22	0.351529	0.306178	0.351529	0.410729
10.23	0.357026	0.31953	0.357026	0.414092
10.24	0.357506	0.314771	0.357506	0.408638
10.25	0.348973	0.30735	0.348973	0.386803
10.26	0.353652	0.295084	0.353652	0.404677
10.27	0.343769	0.29307	0.343769	0.408814
10.28	0.340979	0.285721	0.340979	0.397847
10.29	0.335321	0.288924	0.335321	0.394528
10.3	0.333509	0.293018	0.333509	0.398587
10.31	0.332542	0.282952	0.332542	0.401159
10.32	0.324556	0.297192	0.324556	0.396879
10.33	0.321114	0.303477	0.321114	0.384864
10.34	0.326457	0.311519	0.326457	0.401315
10.35	0.320079	0.326898	0.320079	0.389857
10.36	0.327098	0.315528	0.327098	0.398668
10.37	0.31552	0.309065	0.31552	0.395661
10.38	0.313035	0.319112	0.313035	0.39511
10.39	0.311721	0.315827	0.311721	0.389527
10.4	0.320265	0.308203	0.320265	0.389631
10.41	0.327405	0.310349	0.327405	0.393709
10.42	0.324254	0.331794	0.324254	0.408934
10.43	0.328664	0.312255	0.328664	0.408262
10.44	0.338922	0.296266	0.338922	0.393112
10.45	0.330315	0.307213	0.330315	0.40225
10.46	0.338293	0.306793	0.338293	0.418634
10.47	0.343662	0.294292	0.343662	0.410573
10.48	0.340719	0.311553	0.340719	0.41853
10.49	0.340036	0.306048	0.340036	0.413867
10.5	0.329794	0.30399	0.329794	0.409252
10.51	0.34667	0.305444	0.34667	0.419032
10.52	0.351679	0.300928	0.351679	0.41282
10.53	0.351272	0.283191	0.351272	0.400144
10.54	0.355943	0.301278	0.355943	0.413247
10.55	0.35837	0.291032	0.35837	0.41608
10.56	0.345326	0.307315	0.345326	0.411663
10.57	0.361962	0.302402	0.361962	0.418787
10.58	0.35993	0.291771	0.35993	0.415258
10.59	0.347345	0.314521	0.347345	0.395399
10.6	0.34003	0.309167	0.34003	0.399549
10.61	0.35354	0.310848	0.35354	0.409175
10.62	0.351462	0.299961	0.351462	0.40686
10.63	0.360409	0.308161	0.360409	0.42098
10.64	0.365794	0.302675	0.365794	0.443747
10.65	0.351476	0.319428	0.351476	0.442575
10.66	0.358134	0.325568	0.358134	0.420362
10.67	0.352051	0.333774	0.352051	0.417535
10.68	0.33577	0.317194	0.33577	0.435846
10.69	0.347596	0.321714	0.347596	0.436769
10.7	0.354399	0.310503	0.354399	0.429278
10.71	0.347345	0.308556	0.347345	0.431765
10.72	0.34054	0.317173	0.34054	0.414427
10.73	0.343176	0.317556	0.343176	0.431485
10.74	0.35589	0.314754	0.35589	0.419061
10.75	0.373461	0.296885	0.373461	0.420046
10.76	0.373649	0.303272	0.373649	0.422165
10.77	0.377937	0.29676	0.377937	0.422311
10.78	0.377237	0.309431	0.377237	0.41723
10.79	0.371115	0.304291	0.371115	0.412533
10.8	0.358066	0.307731	0.358066	0.377794
10.81	0.375437	0.299792	0.375437	0.380004
10.82	0.374304	0.302302	0.374304	0.384491
10.83	0.368488	0.293924	0.368488	0.392061
10.84	0.392005	0.290291	0.392005	0.378172
10.85	0.375696	0.298449	0.375696	0.387143
10.86	0.377514	0.276639	0.377514	0.392538
10.87	0.370216	0.281899	0.370216	0.397367
10.88	0.383497	0.298491	0.383497	0.411639
10.89	0.393415	0.290795	0.393415	0.409158
10.9	0.390674	0.294466	0.390674	0.393063
10.91	0.381754	0.310392	0.381754	0.407307
10.92	0.37979	0.301599	0.37979	0.391473
10.93	0.378078	0.305672	0.378078	0.388348
10.94	0.382515	0.29368	0.382515	0.387313
10.95	0.379535	0.281406	0.379535	0.396137
10.96	0.390503	0.279647	0.390503	0.393183
10.97	0.378703	0.301171	0.378703	0.407404
10.98	0.373313	0.30837	0.373313	0.410106
10.99	0.367566	0.310038	0.367566	0.406793
11	0.359545	0.314749	0.359545	0.409445
11.01	0.370439	0.305248	0.370439	0.400741
11.02	0.377244	0.30328	0.377244	0.379751
11.03	0.371737	0.323252	0.371737	0.385924
11.04	0.374054	0.326451	0.374054	0.409853
11.05	0.370638	0.30687	0.370638	0.401535
11.06	0.358412	0.310788	0.358412	0.416636
11.07	0.364986	0.297857	0.364986	0.391247
11.08	0.367756	0.310642	0.367756	0.396179
11.09	0.371576	0.282883	0.371576	0.403021
11.1	0.353259	0.288665	0.353259	0.416805
11.11	0.356325	0.281737	0.356325	0.423289
11.12	0.364571	0.289444	0.364571	0.416892
11.13	0.361609	0.265664	0.361609	0.407329
11.14	0.3351	0.291865	0.3351	0.408789
11.15	0.345109	0.292176	0.345109	0.399204
11.16	0.363343	0.296408	0.363343	0.402801
11.17	0.359219	0.306342	0.359219	0.384476
11.18	0.345081	0.309969	0.345081	0.393433
11.19	0.358813	0.285093	0.358813	0.392296
11.2	0.368012	0.29182	0.368012	0.392229
11.21	0.366348	0.301896	0.366348	0.38704
11.22	0.371642	0.322678	0.371642	0.372625
11.23	0.367468	0.330169	0.367468	0.374494
11.24	0.362163	0.327798	0.362163	0.407996
11.25	0.351076	0.341867	0.351076	0.397342
11.26	0.35061	0.334494	0.35061	0.397264
11.27	0.365144	0.34672	0.365144	0.421984
11.28	0.353658	0.338001	0.353658	0.41123
11.29	0.364735	0.337114	0.364735	0.426031
11.3	0.366397	0.352116	0.366397	0.413532
11.31	0.357458	0.360036	0.357458	0.406024
11.32	0.357073	0.349973	0.357073	0.420278
11.33	0.349018	0.355011	0.349018	0.445134
11.34	0.361924	0.365866	0.361924	0.437477
11.35	0.372839	0.352038	0.372839	0.448572
11.36	0.377569	0.360714	0.377569	0.435059
11.37	0.375603	0.353953	0.375603	0.426127
11.38	0.373894	0.361896	0.373894	0.42332
11.39	0.376365	0.365511	0.376365	0.400047
11.4	0.375521	0.373334	0.375521	0.404938
11.41	0.367066	0.360676	0.367066	0.392731
11.42	0.367145	0.355094	0.367145	0.384897
11.43	0.351799	0.374855	0.351799	0.412608
11.44	0.37374	0.346486	0.37374	0.399137
11.45	0.377392	0.353724	0.377392	0.39855
11.46	0.362727	0.364653	0.362727	0.385038
11.47	0.35368	0.348766	0.35368	0.369845
11.48	0.38187	0.340118	0.38187	0.358848
11.49	0.38398	0.346497	0.38398	0.383136
11.5	0.358463	0.340907	0.358463	0.419849
11.51	0.3618	0.325355	0.3618	0.410557
11.52	0.363725	0.327354	0.363725	0.400168
11.53	0.362767	0.314248	0.362767	0.405296
11.54	0.359918	0.326306	0.359918	0.413095
11.55	0.369432	0.318274	0.369432	0.406748
11.56	0.369885	0.317908	0.369885	0.397928
11.57	0.369889	0.327048	0.369889	0.394283
11.58	0.363558	0.331299	0.363558	0.375188
11.59	0.387062	0.333571	0.387062	0.380156
11.6	0.375414	0.320978	0.375414	0.370787
11.61	0.360707	0.317041	0.360707	0.393428
11.62	0.369048	0.325121	0.369048	0.390125
11.63	0.35533	0.326113	0.35533	0.389673
11.64	0.367127	0.314824	0.367127	0.378821
11.65	0.354278	0.312943	0.354278	0.410446
11.66	0.367171	0.315558	0.367171	0.396749
11.67	0.37293	0.313463	0.37293	0.39417
11.68	0.373427	0.312134	0.373427	0.383479
11.69	0.358886	0.310777	0.358886	0.388358
11.7	0.350685	0.321444	0.350685	0.38297
11.71	0.350461	0.330344	0.350461	0.388056
11.72	0.362891	0.330209	0.362891	0.398053
11.73	0.363822	0.322018	0.363822	0.420427
11.74	0.365192	0.317009	0.365192	0.413631
11.75	0.380798	0.31024	0.380798	0.426936
11.76	0.382857	0.310241	0.382857	0.424333
11.77	0.376984	0.317799	0.376984	0.426627
11.78	0.380254	0.310807	0.380254	0.432441
11.79	0.362279	0.314095	0.362279	0.39903
11.8	0.377081	0.316233	0.377081	0.388485
11.81	0.383691	0.295361	0.383691	0.394712
11.82	0.389631	0.321602	0.389631	0.396589
11.83	0.376243	0.317831	0.376243	0.390481
11.84	0.380414	0.325332	0.380414	0.388496
11.85	0.398447	0.326788	0.398447	0.389628
11.86	0.387116	0.323156	0.387116	0.390005
11.87	0.367378	0.32165	0.367378	0.372622
11.88	0.367186	0.314691	0.367186	0.364404
11.89	0.370858	0.31814	0.370858	0.378529
11.9	0.36336	0.328118	0.36336	0.400132
11.91	0.353491	0.326455	0.353491	0.385549
11.92	0.36741	0.321501	0.36741	0.401556
11.93	0.366196	0.330693	0.366196	0.38595
11.94	0.351501	0.333498	0.351501	0.395097
11.95	0.354798	0.337996	0.354798	0.405421
11.96	0.349394	0.350565	0.349394	0.417168
11.97	0.361368	0.339207	0.361368	0.400693
11.98	0.352439	0.343393	0.352439	0.392501
11.99	0.356567	0.343284	0.356567	0.3923
12	0.357872	0.354569	0.357872	0.391907
12.01	0.345521	0.332062	0.345521	0.380812
12.02	0.339708	0.352761	0.339708	0.374318
12.03	0.340537	0.34826	0.340537	0.370802
12.04	0.341033	0.356392	0.341033	0.385426
12.05	0.342202	0.37002	0.342202	0.385386
12.06	0.343754	0.36028	0.343754	0.366266
12.07	0.352105	0.358034	0.352105	0.355369
12.08	0.352301	0.343662	0.352301	0.3648
12.09	0.332232	0.350733	0.332232	0.362019
12.1	0.345036	0.341672	0.345036	0.358525
12.11	0.36165	0.34056	0.36165	0.361564
12.12	0.345214	0.329802	0.345214	0.373517
12.13	0.34554	0.338182	0.34554	0.363073
12.14	0.340161	0.339158	0.340161	0.380813
12.15	0.341388	0.334018	0.341388	0.375121
12.16	0.360084	0.328047	0.360084	0.390716
12.17	0.359011	0.32951	0.359011	0.395829
12.18	0.363539	0.341047	0.363539	0.380342
12.19	0.369783	0.329695	0.369783	0.396861
12.2	0.360228	0.31754	0.360228	0.383266
12.21	0.348191	0.308351	0.348191	0.388599
12.22	0.354431	0.32172	0.354431	0.396263
12.23	0.3651	0.316172	0.3651	0.399271
12.24	0.362244	0.31508	0.362244	0.390384
12.25	0.356076	0.311529	0.356076	0.398526
12.26	0.35625	0.304273	0.35625	0.393795
12.27	0.355877	0.315225	0.355877	0.391424
12.28	0.354857	0.315168	0.354857	0.375864
12.29	0.353233	0.31044	0.353233	0.370154
12.3	0.362189	0.308407	0.362189	0.380586
12.31	0.358692	0.298962	0.358692	0.373995
12.32	0.364535	0.298965	0.364535	0.379004
12.33	0.352841	0.296126	0.352841	0.385103
12.34	0.342532	0.296349	0.342532	0.368942
12.35	0.352428	0.308259	0.352428	0.370926
12.36	0.348183	0.327389	0.348183	0.383566
12.37	0.356015	0.318045	0.356015	0.388753
12.38	0.357048	0.319665	0.357048	0.394069
12.39	0.34675	0.311426	0.34675	0.406235
12.4	0.354531	0.32439	0.354531	0.397199
12.41	0.348759	0.306147	0.348759	0.39378
12.42	0.364499	0.297523	0.364499	0.395143
12.43	0.372617	0.290033	0.372617	0.403704
12.44	0.361195	0.296218	0.361195	0.397514
12.45	0.354273	0.301261	0.354273	0.389531
12.46	0.353045	0.303878	0.353045	0.362758
12.47	0.36276	0.304446	0.36276	0.352198
12.48	0.36362	0.300516	0.36362	0.365431
12.49	0.374058	0.306745	0.374058	0.3729
12.5	0.353732	0.297797	0.353732	0.366031
12.51	0.373669	0.309141	0.373669	0.379803
12.52	0.374997	0.29355	0.374997	0.38186
12.53	0.36821	0.308429	0.36821	0.359909
12.54	0.360395	0.296243	0.360395	0.373126
12.55	0.368932	0.315262	0.368932	0.366833
12.56	0.366513	0.306901	0.366513	0.400875
12.57	0.362804	0.301965	0.362804	0.389034
12.58	0.374545	0.305285	0.374545	0.391046
12.59	0.373996	0.318751	0.373996	0.406518
12.6	0.366864	0.308586	0.366864	0.389629
12.61	0.365168	0.326219	0.365168	0.416883
12.62	0.370409	0.313177	0.370409	0.381529
12.63	0.373235	0.289195	0.373235	0.389037
12.64	0.366627	0.308904	0.366627	0.392795
12.65	0.362967	0.315733	0.362967	0.415295
12.66	0.357204	0.316155	0.357204	0.407725
12.67	0.361073	0.314876	0.361073	0.408507
12.68	0.373251	0.31656	0.373251	0.402439
12.69	0.37537	0.297947	0.37537	0.412376
12.7	0.361442	0.31118	0.361442	0.417372
12.71	0.374725	0.309107	0.374725	0.418013
12.72	0.384322	0.328253	0.384322	0.431008
12.73	0.372846	0.343103	0.372846	0.426511
12.74	0.380807	0.332214	0.380807	0.398987
12.75	0.376885	0.3296	0.376885	0.421051
12.76	0.389893	0.330786	0.389893	0.424112
12.77	0.400908	0.324847	0.400908	0.414142
12.78	0.404232	0.326178	0.404232	0.427494
12.79	0.405826	0.330157	0.405826	0.44274
12.8	0.407382	0.324318	0.407382	0.445549
12.81	0.417572	0.327241	0.417572	0.43011
12.82	0.409069	0.341086	0.409069	0.437108
12.83	0.421131	0.338431	0.421131	0.437473
12.84	0.416743	0.33236	0.416743	0.458639
12.85	0.41107	0.338624	0.41107	0.445007
12.86	0.413728	0.321634	0.413728	0.442399
12.87	0.411171	0.329972	0.411171	0.450251
12.88	0.415614	0.331232	0.415614	0.45028
12.89	0.421179	0.332486	0.421179	0.433739
12.9	0.418973	0.33817	0.418973	0.433653
12.91	0.408522	0.329994	0.408522	0.4433
12.92	0.417094	0.343043	0.417094	0.452881
12.93	0.418513	0.349398	0.418513	0.442551
12.94	0.417688	0.341165	0.417688	0.419591
12.95	0.422684	0.35027	0.422684	0.419253
12.96	0.424653	0.357671	0.424653	0.436202
12.97	0.403586	0.351305	0.403586	0.423341
12.98	0.399942	0.346193	0.399942	0.41983
12.99	0.399712	0.349526	0.399712	0.422666
13	0.391943	0.350272	0.391943	0.420511
13.01	0.396247	0.347424	0.396247	0.422901
13.02	0.403664	0.352428	0.403664	0.436414
13.03	0.407994	0.339431	0.407994	0.441667
13.04	0.416816	0.339139	0.416816	0.447987
13.05	0.424958	0.349695	0.424958	0.434858
13.06	0.405788	0.347553	0.405788	0.416556
13.07	0.409255	0.348976	0.409255	0.427414
13.08	0.400812	0.360281	0.400812	0.412762
13.09	0.400518	0.373539	0.400518	0.413719
13.1	0.409836	0.366089	0.409836	0.407526
13.11	0.413871	0.367996	0.413871	0.432336
13.12	0.392427	0.363874	0.392427	0.413747
13.13	0.396699	0.376507	0.396699	0.404824
13.14	0.409866	0.375997	0.409866	0.41192
13.15	0.421242	0.37255	0.421242	0.41913
13.16	0.420269	0.384795	0.420269	0.415091
13.17	0.424596	0.374554	0.424596	0.413807
13.18	0.416025	0.362345	0.416025	0.426098
13.19	0.416895	0.358509	0.416895	0.442585
13.2	0.40954	0.373844	0.40954	0.425175
13.21	0.405327	0.358862	0.405327	0.424851
13.22	0.422485	0.358289	0.422485	0.412443
13.23	0.427776	0.371851	0.427776	0.407656
13.24	0.428885	0.360587	0.428885	0.416304
13.25	0.417712	0.373514	0.417712	0.410398
13.26	0.41615	0.375606	0.41615	0.409215
13.27	0.405934	0.375271	0.405934	0.401009
13.28	0.392875	0.377002	0.392875	0.42444
13.29	0.402375	0.360486	0.402375	0.417567
13.3	0.400761	0.356671	0.400761	0.407403
13.31	0.4091	0.347182	0.4091	0.402679
13.32	0.403976	0.347976	0.403976	0.424161
13.33	0.399743	0.343223	0.399743	0.408755
13.34	0.393094	0.362154	0.393094	0.395176
13.35	0.378397	0.356502	0.378397	0.403878
13.36	0.389839	0.379386	0.389839	0.414504
13.37	0.378667	0.367141	0.378667	0.409208
13.38	0.370014	0.378934	0.370014	0.398012
13.39	0.360769	0.368525	0.360769	0.392139
13.4	0.371007	0.386356	0.371007	0.406836
13.41	0.380501	0.394451	0.380501	0.40367
13.42	0.383676	0.402626	0.383676	0.414868
13.43	0.381418	0.381842	0.381418	0.423197
13.44	0.383747	0.400467	0.383747	0.419615
13.45	0.383764	0.398005	0.383764	0.42921
13.46	0.393806	0.386418	0.393806	0.420013
13.47	0.389306	0.394675	0.389306	0.425419
13.48	0.380977	0.373223	0.380977	0.424812
13.49	0.372253	0.371248	0.372253	0.427185
13.5	0.383215	0.372085	0.383215	0.397369
13.51	0.373387	0.379126	0.373387	0.413772
13.52	0.37965	0.387307	0.37965	0.418373
13.53	0.38311	0.387883	0.38311	0.411704
13.54	0.386831	0.369549	0.386831	0.412807
13.55	0.384077	0.372766	0.384077	0.422289
13.56	0.380357	0.342338	0.380357	0.427727
13.57	0.379806	0.346647	0.379806	0.426034
13.58	0.387761	0.352352	0.387761	0.442269
13.59	0.381676	0.352617	0.381676	0.441808
13.6	0.380639	0.347403	0.380639	0.431153
13.61	0.386122	0.348938	0.386122	0.439673
13.62	0.390629	0.347563	0.390629	0.425044
13.63	0.395965	0.350482	0.395965	0.424654
13.64	0.382741	0.35486	0.382741	0.422449
13.65	0.380087	0.347778	0.380087	0.430584
13.66	0.385371	0.343191	0.385371	0.416406
13.67	0.398289	0.360423	0.398289	0.420195
13.68	0.37995	0.388319	0.37995	0.421264
13.69	0.367474	0.385417	0.367474	0.415851
13.7	0.366406	0.379818	0.366406	0.421972
13.71	0.379329	0.35799	0.379329	0.409784
13.72	0.377479	0.352156	0.377479	0.426298
13.73	0.391089	0.336658	0.391089	0.420966
13.74	0.386604	0.344926	0.386604	0.433566
13.75	0.38616	0.343516	0.38616	0.438215
13.76	0.38274	0.33226	0.38274	0.442132
13.77	0.368757	0.32034	0.368757	0.433869
13.78	0.373036	0.322118	0.373036	0.439497
13.79	0.362304	0.332703	0.362304	0.440911
13.8	0.369687	0.33304	0.369687	0.420153
13.81	0.371419	0.327602	0.371419	0.43353
13.82	0.384082	0.31929	0.384082	0.441933
13.83	0.360132	0.321473	0.360132	0.440684
13.84	0.366344	0.329955	0.366344	0.439428
13.85	0.37193	0.337459	0.37193	0.449947
13.86	0.370902	0.331542	0.370902	0.470779
13.87	0.372317	0.34711	0.372317	0.439095
13.88	0.379354	0.342819	0.379354	0.432223
13.89	0.376891	0.329956	0.376891	0.440334
13.9	0.379826	0.3354	0.379826	0.439376
13.91	0.395109	0.344735	0.395109	0.42294
13.92	0.397162	0.352388	0.397162	0.431173
13.93	0.392522	0.357242	0.392522	0.430111
13.94	0.407917	0.353605	0.407917	0.430321
13.95	0.39418	0.353934	0.39418	0.425497
13.96	0.381728	0.357581	0.381728	0.435862
13.97	0.37792	0.356285	0.37792	0.435372
13.98	0.383147	0.352998	0.383147	0.444038
13.99	0.37802	0.361155	0.37802	0.442155
14	0.38021	0.354086	0.38021	0.439267
14.01	0.381156	0.354941	0.381156	0.433965
14.02	0.378719	0.370883	0.378719	0.453541
14.03	0.405756	0.364039	0.405756	0.457543
14.04	0.392687	0.35575	0.392687	0.45307
14.05	0.403203	0.354388	0.403203	0.448435
14.06	0.406865	0.351714	0.406865	0.454011
14.07	0.393199	0.347206	0.393199	0.467349
14.08	0.404416	0.353361	0.404416	0.473414
14.09	0.40436	0.346703	0.40436	0.475379
14.1	0.394108	0.337198	0.394108	0.478824
14.11	0.394377	0.319364	0.394377	0.476348
14.12	0.389616	0.31215	0.389616	0.468434
14.13	0.405759	0.322401	0.405759	0.46713
14.14	0.403154	0.324579	0.403154	0.448949
14.15	0.391627	0.329077	0.391627	0.432102
14.16	0.385781	0.334599	0.385781	0.438624
14.17	0.387351	0.326898	0.387351	0.436149
14.18	0.376103	0.31956	0.376103	0.445918
14.19	0.381622	0.310531	0.381622	0.433434
14.2	0.371772	0.32069	0.371772	0.428414
14.21	0.375455	0.324905	0.375455	0.427783
14.22	0.378548	0.318218	0.378548	0.428246
14.23	0.375173	0.325934	0.375173	0.439323
14.24	0.378156	0.329701	0.378156	0.445336
14.25	0.376631	0.340102	0.376631	0.452795
14.26	0.376018	0.335938	0.376018	0.459645
14.27	0.37391	0.328447	0.37391	0.466411
14.28	0.37958	0.34669	0.37958	0.467214
14.29	0.375992	0.3445	0.375992	0.444976
14.3	0.376219	0.339222	0.376219	0.438292
14.31	0.370669	0.34392	0.370669	0.443116
14.32	0.389143	0.344021	0.389143	0.434529
14.33	0.389039	0.331901	0.389039	0.421505
14.34	0.383339	0.326716	0.383339	0.424868
14.35	0.374195	0.322862	0.374195	0.423578
14.36	0.379808	0.326412	0.379808	0.428527
14.37	0.381812	0.319993	0.381812	0.421556
14.38	0.379448	0.307012	0.379448	0.425651
14.39	0.393228	0.32746	0.393228	0.425984
14.4	0.390678	0.340789	0.390678	0.434517
14.41	0.400046	0.338099	0.400046	0.433406
14.42	0.403351	0.32212	0.403351	0.442651
14.43	0.419196	0.319915	0.419196	0.445379
14.44	0.399522	0.322582	0.399522	0.442321
14.45	0.391908	0.320501	0.391908	0.447455
14.46	0.402137	0.332111	0.402137	0.456115
14.47	0.40513	0.332301	0.40513	0.456557
14.48	0.40557	0.334081	0.40557	0.472425
14.49	0.400332	0.341767	0.400332	0.462666
14.5	0.411329	0.350461	0.411329	0.479872
14.51	0.403653	0.327361	0.403653	0.454436
14.52	0.399525	0.342051	0.399525	0.45737
14.53	0.40375	0.341362	0.40375	0.452921
14.54	0.412496	0.333907	0.412496	0.460543
14.55	0.405961	0.348661	0.405961	0.449091
14.56	0.415372	0.334317	0.415372	0.457279
14.57	0.399885	0.331916	0.399885	0.463799
14.58	0.39821	0.321335	0.39821	0.449675
14.59	0.406708	0.330814	0.406708	0.450607
14.6	0.41099	0.325101	0.41099	0.446429
14.61	0.405066	0.329514	0.405066	0.445082
14.62	0.408375	0.327951	0.408375	0.457256
14.63	0.398282	0.322569	0.398282	0.453647
14.64	0.409852	0.335189	0.409852	0.456274
14.65	0.405723	0.342641	0.405723	0.459025
14.66	0.398031	0.346655	0.398031	0.46328
14.67	0.403159	0.351693	0.403159	0.475312
14.68	0.404115	0.355894	0.404115	0.491189
14.69	0.41766	0.346496	0.41766	0.487277
14.7	0.417603	0.34671	0.417603	0.494521
14.71	0.41738	0.345791	0.41738	0.481017
14.72	0.409629	0.342669	0.409629	0.475163
14.73	0.408426	0.335055	0.408426	0.46694
14.74	0.426246	0.327127	0.426246	0.471836
14.75	0.421998	0.335863	0.421998	0.464219
14.76	0.431811	0.320776	0.431811	0.466011
14.77	0.427795	0.331491	0.427795	0.447276
14.78	0.434089	0.323107	0.434089	0.459363
14.79	0.422757	0.325269	0.422757	0.439752
14.8	0.421635	0.326304	0.421635	0.435273
14.81	0.427051	0.336167	0.427051	0.453992
14.82	0.42514	0.337258	0.42514	0.467671
14.83	0.435228	0.329518	0.435228	0.468033
14.84	0.423762	0.317158	0.423762	0.474197
14.85	0.419663	0.310036	0.419663	0.47597
14.86	0.409948	0.308258	0.409948	0.47168
14.87	0.420807	0.321214	0.420807	0.461319
14.88	0.426809	0.303645	0.426809	0.459812
14.89	0.432308	0.327967	0.432308	0.458648
14.9	0.432867	0.330809	0.432867	0.451869
14.91	0.430297	0.331626	0.430297	0.468234
14.92	0.440141	0.325199	0.440141	0.472359
14.93	0.442001	0.318037	0.442001	0.461307
14.94	0.455567	0.33095	0.455567	0.47143
14.95	0.467091	0.323987	0.467091	0.478253
14.96	0.472409	0.321358	0.472409	0.474576
14.97	0.470273	0.322223	0.470273	0.467318
14.98	0.457583	0.336912	0.457583	0.468385
14.99	0.466509	0.339593	0.466509	0.461348
15	0.467236	0.3515	0.467236	0.466227
15.01	0.45016	0.346801	0.45016	0.455161
15.02	0.44749	0.350437	0.44749	0.446012
15.03	0.437983	0.353131	0.437983	0.451227
15.04	0.439982	0.355145	0.439982	0.455199
15.05	0.444601	0.372017	0.444601	0.445366
15.06	0.435941	0.37041	0.435941	0.43984
15.07	0.443979	0.386646	0.443979	0.451622
15.08	0.423379	0.384516	0.423379	0.437476
15.09	0.412674	0.387333	0.412674	0.453282
15.1	0.413876	0.376052	0.413876	0.450517
15.11	0.420344	0.369114	0.420344	0.442426
15.12	0.432113	0.369365	0.432113	0.440062
15.13	0.430052	0.381755	0.430052	0.431255
15.14	0.431263	0.383071	0.431263	0.426788
15.15	0.428253	0.388924	0.428253	0.413345
15.16	0.415465	0.37411	0.415465	0.397112
15.17	0.408077	0.361192	0.408077	0.398275
15.18	0.402378	0.347113	0.402378	0.400606
15.19	0.406418	0.352582	0.406418	0.395889
15.2	0.401217	0.352398	0.401217	0.412951
15.21	0.395485	0.351806	0.395485	0.419019
15.22	0.391013	0.345442	0.391013	0.427802
15.23	0.395566	0.352517	0.395566	0.417144
15.24	0.39252	0.361141	0.39252	0.413274
15.25	0.402722	0.360353	0.402722	0.400229
15.26	0.403202	0.357272	0.403202	0.397979
15.27	0.394556	0.348722	0.394556	0.398744
15.28	0.410858	0.348791	0.410858	0.405916
15.29	0.40927	0.347602	0.40927	0.417499
15.3	0.405629	0.341099	0.405629	0.414703
15.31	0.409414	0.348852	0.409414	0.411722
15.32	0.404159	0.361702	0.404159	0.410367
15.33	0.414296	0.343527	0.414296	0.419307
15.34	0.423009	0.346261	0.423009	0.401605
15.35	0.413771	0.351666	0.413771	0.398521
15.36	0.40992	0.36137	0.40992	0.386569
15.37	0.400051	0.35122	0.400051	0.396318
15.38	0.401163	0.341696	0.401163	0.408035
15.39	0.409046	0.354693	0.409046	0.398807
15.4	0.415008	0.355501	0.415008	0.399529
15.41	0.417579	0.352382	0.417579	0.40234
15.42	0.422698	0.342739	0.422698	0.404936
15.43	0.416472	0.359126	0.416472	0.410278
15.44	0.42422	0.370028	0.42422	0.408282
15.45	0.427967	0.378038	0.427967	0.40247
15.46	0.428243	0.365772	0.428243	0.400357
15.47	0.432161	0.376652	0.432161	0.397437
15.48	0.428789	0.367847	0.428789	0.394732
15.49	0.416059	0.368189	0.416059	0.38554
15.5	0.410316	0.362889	0.410316	0.390982
15.51	0.404133	0.351643	0.404133	0.406955
15.52	0.405492	0.369557	0.405492	0.399541
15.53	0.411454	0.365285	0.411454	0.386305
15.54	0.397476	0.347774	0.397476	0.381198
15.55	0.406975	0.359034	0.406975	0.388947
15.56	0.400842	0.345493	0.400842	0.387169
15.57	0.403996	0.354609	0.403996	0.395552
15.58	0.39319	0.364335	0.39319	0.40061
15.59	0.386013	0.363687	0.386013	0.392659
15.6	0.408968	0.364659	0.408968	0.402463
15.61	0.428024	0.353325	0.428024	0.418652
15.62	0.42011	0.34004	0.42011	0.415418
15.63	0.430165	0.322868	0.430165	0.435471
15.64	0.433025	0.333342	0.433025	0.432589
15.65	0.420277	0.329256	0.420277	0.427262
15.66	0.416297	0.32291	0.416297	0.418071
15.67	0.419994	0.343294	0.419994	0.408288
15.68	0.417488	0.349547	0.417488	0.404936
15.69	0.424154	0.369058	0.424154	0.407788
15.7	0.422496	0.348137	0.422496	0.396466
15.71	0.410324	0.341329	0.410324	0.399517
15.72	0.406474	0.333991	0.406474	0.40319
15.73	0.4066	0.310092	0.4066	0.399528
15.74	0.416825	0.335987	0.416825	0.404913
15.75	0.417955	0.32198	0.417955	0.401013
15.76	0.409874	0.323437	0.409874	0.403246
15.77	0.412668	0.331469	0.412668	0.403401
15.78	0.407589	0.331165	0.407589	0.390221
15.79	0.419627	0.307467	0.419627	0.391983
15.8	0.425511	0.323335	0.425511	0.38075
15.81	0.421561	0.335337	0.421561	0.378587
15.82	0.422711	0.323134	0.422711	0.3989
15.83	0.419783	0.32998	0.419783	0.399569
15.84	0.427932	0.350525	0.427932	0.395657
15.85	0.431225	0.336436	0.431225	0.393882
15.86	0.414048	0.336684	0.414048	0.394755
15.87	0.4238	0.347688	0.4238	0.382902
15.88	0.413159	0.339066	0.413159	0.395927
15.89	0.400735	0.327922	0.400735	0.379994
15.9	0.40908	0.345844	0.40908	0.384771
15.91	0.418911	0.346405	0.418911	0.385223
15.92	0.420361	0.340141	0.420361	0.385747
15.93	0.428816	0.344514	0.428816	0.376831
15.94	0.429475	0.326192	0.429475	0.388557
15.95	0.440426	0.340339	0.440426	0.393166
15.96	0.437204	0.333083	0.437204	0.398003
15.97	0.443053	0.339305	0.443053	0.410223
15.98	0.445874	0.32376	0.445874	0.406586
15.99	0.442303	0.341135	0.442303	0.389337
16	0.43807	0.355592	0.43807	0.372394
16.01	0.437996	0.34569	0.437996	0.388146
16.02	0.455817	0.32944	0.455817	0.389685
16.03	0.454951	0.324354	0.454951	0.393245
16.04	0.45311	0.320308	0.45311	0.393469
16.05	0.463364	0.314251	0.463364	0.393247
16.06	0.451988	0.319517	0.451988	0.412202
16.07	0.457812	0.327859	0.457812	0.414686
16.08	0.463062	0.327645	0.463062	0.40539
16.09	0.472316	0.335169	0.472316	0.405875
16.1	0.457084	0.330517	0.457084	0.412359
16.11	0.456767	0.317056	0.456767	0.414362
16.12	0.442551	0.336803	0.442551	0.411281
16.13	0.460668	0.356794	0.460668	0.413202
16.14	0.449315	0.368201	0.449315	0.41107
16.15	0.439722	0.371927	0.439722	0.419418
16.16	0.449926	0.367629	0.449926	0.418329
16.17	0.451268	0.343765	0.451268	0.434976
16.18	0.429914	0.344369	0.429914	0.419193
16.19	0.40439	0.37548	0.40439	0.407645
16.2	0.401828	0.36594	0.401828	0.398592
16.21	0.402505	0.368008	0.402505	0.40488
16.22	0.409983	0.367892	0.409983	0.402051
16.23	0.421812	0.368326	0.421812	0.39951
16.24	0.426098	0.356353	0.426098	0.404335
16.25	0.409484	0.360077	0.409484	0.403687
16.26	0.415149	0.365096	0.415149	0.400283
16.27	0.419357	0.371071	0.419357	0.420238
16.28	0.42551	0.378752	0.42551	0.412187
16.29	0.421151	0.383342	0.421151	0.416783
16.3	0.424275	0.385815	0.424275	0.414255
16.31	0.420709	0.380518	0.420709	0.418343
16.32	0.413927	0.388893	0.413927	0.405892
16.33	0.419601	0.380693	0.419601	0.415382
16.34	0.414732	0.408865	0.414732	0.414483
16.35	0.408913	0.393923	0.408913	0.420156
16.36	0.412246	0.389808	0.412246	0.397768
16.37	0.401017	0.413626	0.401017	0.386045
16.38	0.392492	0.403929	0.392492	0.423508
16.39	0.393426	0.393117	0.393426	0.414279
16.4	0.38603	0.399239	0.38603	0.395092
16.41	0.388558	0.371694	0.388558	0.38861
16.42	0.398506	0.396574	0.398506	0.38345
16.43	0.390313	0.398958	0.390313	0.385867
16.44	0.395724	0.394293	0.395724	0.392659
16.45	0.405923	0.375553	0.405923	0.387776
16.46	0.410781	0.397162	0.410781	0.390194
16.47	0.414339	0.380561	0.414339	0.382332
16.48	0.419123	0.392549	0.419123	0.376828
16.49	0.407543	0.414242	0.407543	0.371585
16.5	0.399299	0.394288	0.399299	0.376568
16.51	0.414499	0.39117	0.414499	0.365389
16.52	0.410419	0.403336	0.410419	0.357264
16.53	0.40802	0.392929	0.40802	0.363805
16.54	0.41528	0.38053	0.41528	0.381285
16.55	0.399265	0.374347	0.399265	0.380045
16.56	0.39288	0.366403	0.39288	0.379765
16.57	0.396	0.375224	0.396	0.383054
16.58	0.392646	0.373467	0.392646	0.381659
16.59	0.396665	0.385976	0.396665	0.398677
16.6	0.404149	0.37921	0.404149	0.392612
16.61	0.393541	0.369845	0.393541	0.396385
16.62	0.407714	0.387334	0.407714	0.401112
16.63	0.423909	0.387902	0.423909	0.392036
16.64	0.435938	0.391546	0.435938	0.399614
16.65	0.437444	0.395918	0.437444	0.405902
16.66	0.434095	0.397621	0.434095	0.397771
16.67	0.417835	0.406935	0.417835	0.411442
16.68	0.426248	0.397289	0.426248	0.405013
16.69	0.427712	0.400787	0.427712	0.407228
16.7	0.425749	0.397591	0.425749	0.409644
16.71	0.429362	0.391648	0.429362	0.375959
16.72	0.410716	0.395575	0.410716	0.397347
16.73	0.432465	0.408135	0.432465	0.38104
16.74	0.429923	0.415472	0.429923	0.395291
16.75	0.430641	0.382841	0.430641	0.406315
16.76	0.437243	0.373974	0.437243	0.426488
16.77	0.441128	0.362554	0.441128	0.418578
16.78	0.4191	0.351851	0.4191	0.406338
16.79	0.415812	0.363997	0.415812	0.386764
16.8	0.42423	0.356242	0.42423	0.400055
16.81	0.427686	0.348118	0.427686	0.395837
16.82	0.418417	0.356129	0.418417	0.394658
16.83	0.415595	0.339481	0.415595	0.394939
16.84	0.432405	0.347027	0.432405	0.383597
16.85	0.423335	0.351948	0.423335	0.369384
16.86	0.422641	0.364742	0.422641	0.372238
16.87	0.421406	0.382112	0.421406	0.366613
16.88	0.420956	0.383034	0.420956	0.372826
16.89	0.421786	0.375413	0.421786	0.373455
16.9	0.423074	0.389238	0.423074	0.374646
16.91	0.420638	0.393421	0.420638	0.393674
16.92	0.422721	0.407301	0.422721	0.381363
16.93	0.41788	0.412215	0.41788	0.3812
16.94	0.416145	0.409309	0.416145	0.383561
16.95	0.417114	0.418813	0.417114	0.387201
16.96	0.398052	0.415213	0.398052	0.397535
16.97	0.403586	0.431404	0.403586	0.400485
16.98	0.414184	0.423247	0.414184	0.399808
16.99	0.403291	0.406266	0.403291	0.417451
17	0.412265	0.410209	0.412265	0.418378
17.01	0.414183	0.431395	0.414183	0.416562
17.02	0.409423	0.420923	0.409423	0.417733
17.03	0.396098	0.415209	0.396098	0.420463
17.04	0.413843	0.432069	0.413843	0.415286
17.05	0.414817	0.422173	0.414817	0.396038
17.06	0.41634	0.431274	0.41634	0.406491
17.07	0.419915	0.432268	0.419915	0.387542
17.08	0.418697	0.435822	0.418697	0.399123
17.09	0.421469	0.42929	0.421469	0.413965
17.1	0.426797	0.422768	0.426797	0.40888
17.11	0.428974	0.421972	0.428974	0.436893
17.12	0.429466	0.430011	0.429466	0.444401
17.13	0.434853	0.417294	0.434853	0.433879
17.14	0.41439	0.431432	0.41439	0.431799
17.15	0.423043	0.416434	0.423043	0.428854
17.16	0.421861	0.407633	0.421861	0.435289
17.17	0.414164	0.404858	0.414164	0.446964
17.18	0.43703	0.4113	0.43703	0.434367
17.19	0.448143	0.412566	0.448143	0.44366
17.2	0.44076	0.424882	0.44076	0.438006
17.21	0.439439	0.407326	0.439439	0.444326
17.22	0.446183	0.413923	0.446183	0.442236
17.23	0.440765	0.407743	0.440765	0.437227
17.24	0.439849	0.388854	0.439849	0.408612
17.25	0.426594	0.402534	0.426594	0.397586
17.26	0.436806	0.405942	0.436806	0.394807
17.27	0.435057	0.413166	0.435057	0.403243
17.28	0.4449	0.412893	0.4449	0.412535
17.29	0.443407	0.406243	0.443407	0.42166
17.3	0.447304	0.402559	0.447304	0.42699
17.31	0.466845	0.402888	0.466845	0.405469
17.32	0.469772	0.427331	0.469772	0.395605
17.33	0.451144	0.401267	0.451144	0.393393
17.34	0.461911	0.399743	0.461911	0.40486
17.35	0.443277	0.399773	0.443277	0.410092
17.36	0.43521	0.400386	0.43521	0.408121
17.37	0.432416	0.41574	0.432416	0.405284
17.38	0.447922	0.428805	0.447922	0.416577
17.39	0.437423	0.425905	0.437423	0.409327
17.4	0.432801	0.423848	0.432801	0.400549
17.41	0.431475	0.424034	0.431475	0.402737
17.42	0.418321	0.423874	0.418321	0.392625
17.43	0.43104	0.427172	0.43104	0.388231
17.44	0.443312	0.414251	0.443312	0.389266
17.45	0.437268	0.420575	0.437268	0.391833
17.46	0.432696	0.402653	0.432696	0.388017
17.47	0.431635	0.417975	0.431635	0.401302
17.48	0.433671	0.426998	0.433671	0.398054
17.49	0.437104	0.41454	0.437104	0.407838
17.5	0.448398	0.42948	0.448398	0.404954
17.51	0.453204	0.430352	0.453204	0.413766
17.52	0.440637	0.422421	0.440637	0.423676
17.53	0.455261	0.403099	0.455261	0.408098
17.54	0.450066	0.410719	0.450066	0.405685
17.55	0.451082	0.422509	0.451082	0.408072
17.56	0.459244	0.421079	0.459244	0.405893
17.57	0.468017	0.429894	0.468017	0.417006
17.58	0.456181	0.428637	0.456181	0.406011
17.59	0.459269	0.425523	0.459269	0.415874
17.6	0.460974	0.434708	0.460974	0.408488
17.61	0.451236	0.447817	0.451236	0.420501
17.62	0.455001	0.451245	0.455001	0.433995
17.63	0.448436	0.426941	0.448436	0.418137
17.64	0.452823	0.408247	0.452823	0.418615
17.65	0.454748	0.407524	0.454748	0.416626
17.66	0.428687	0.411369	0.428687	0.41026
17.67	0.432993	0.430652	0.432993	0.425246
17.68	0.435328	0.407346	0.435328	0.410146
17.69	0.440636	0.418413	0.440636	0.414741
17.7	0.440005	0.429387	0.440005	0.4284
17.71	0.454335	0.420572	0.454335	0.422178
17.72	0.4374	0.417621	0.4374	0.420338
17.73	0.439415	0.399805	0.439415	0.433354
17.74	0.436753	0.392055	0.436753	0.455749
17.75	0.440494	0.396104	0.440494	0.459798
17.76	0.449315	0.412184	0.449315	0.45477
17.77	0.45385	0.417903	0.45385	0.453226
17.78	0.445619	0.420023	0.445619	0.47086
17.79	0.442549	0.411978	0.442549	0.470213
17.8	0.446936	0.42082	0.446936	0.471631
17.81	0.438551	0.426194	0.438551	0.455682
17.82	0.423662	0.439781	0.423662	0.449586
17.83	0.432106	0.445012	0.432106	0.448889
17.84	0.415927	0.441935	0.415927	0.439206
17.85	0.415689	0.449348	0.415689	0.447361
17.86	0.414095	0.450925	0.414095	0.450248
17.87	0.458012	0.453203	0.458012	0.45132
17.88	0.441228	0.450815	0.441228	0.449556
17.89	0.444469	0.454832	0.444469	0.450354
17.9	0.449366	0.448852	0.449366	0.457405
17.91	0.451704	0.448706	0.451704	0.447373
17.92	0.431372	0.445823	0.431372	0.438292
17.93	0.424582	0.438652	0.424582	0.461549
17.94	0.423595	0.436747	0.423595	0.455958
17.95	0.421674	0.431319	0.421674	0.456281
17.96	0.415107	0.412613	0.415107	0.4588
17.97	0.428985	0.414153	0.428985	0.461351
17.98	0.431375	0.422503	0.431375	0.477057
17.99	0.429375	0.429673	0.429375	0.473646
18	0.423837	0.419788	0.423837	0.461453
18.01	0.428359	0.444008	0.428359	0.473954
18.02	0.416359	0.461923	0.416359	0.46166
18.03	0.408634	0.482026	0.408634	0.456848
18.04	0.422693	0.484882	0.422693	0.443233
18.05	0.421797	0.46962	0.421797	0.440518
18.06	0.423699	0.483241	0.423699	0.443528
18.07	0.401961	0.474672	0.401961	0.433378
18.08	0.415528	0.474182	0.415528	0.41084
18.09	0.405983	0.466331	0.405983	0.416467
18.1	0.41348	0.470783	0.41348	0.419215
18.11	0.426492	0.454613	0.426492	0.425055
18.12	0.432346	0.446208	0.432346	0.413006
18.13	0.430501	0.459049	0.430501	0.410911
18.14	0.423242	0.430644	0.423242	0.43246
18.15	0.425262	0.445056	0.425262	0.431619
18.16	0.435914	0.434807	0.435914	0.427795
18.17	0.436742	0.452525	0.436742	0.431744
18.18	0.436593	0.470934	0.436593	0.415422
18.19	0.442544	0.465054	0.442544	0.436447
18.2	0.448773	0.467442	0.448773	0.43535
18.21	0.428895	0.455796	0.428895	0.42647
18.22	0.42497	0.460002	0.42497	0.427817
18.23	0.43094	0.456588	0.43094	0.424552
18.24	0.451029	0.469052	0.451029	0.444086
18.25	0.437742	0.457594	0.437742	0.444844
18.26	0.4515	0.430952	0.4515	0.460603
18.27	0.460938	0.436295	0.460938	0.449245
18.28	0.457405	0.442514	0.457405	0.43699
18.29	0.458307	0.439185	0.458307	0.43836
18.3	0.458952	0.435607	0.458952	0.444079
18.31	0.477452	0.444414	0.477452	0.445439
18.32	0.478855	0.433179	0.478855	0.435099
18.33	0.49078	0.438804	0.49078	0.445799
18.34	0.499912	0.435105	0.499912	0.441831
18.35	0.520724	0.429858	0.520724	0.438805
18.36	0.534483	0.430568	0.534483	0.427597
18.37	0.515822	0.43408	0.515822	0.444531
18.38	0.509851	0.45406	0.509851	0.447233
18.39	0.508884	0.470618	0.508884	0.429308
18.4	0.506072	0.459504	0.506072	0.440155
18.41	0.508589	0.454894	0.508589	0.419543
18.42	0.518108	0.437987	0.518108	0.409777
18.43	0.499166	0.457405	0.499166	0.422195
18.44	0.501312	0.458936	0.501312	0.41302
18.45	0.501485	0.443878	0.501485	0.404807
18.46	0.507754	0.447779	0.507754	0.427606
18.47	0.510348	0.458519	0.510348	0.41759
18.48	0.510174	0.448237	0.510174	0.410189
18.49	0.509861	0.447667	0.509861	0.412326
18.5	0.507288	0.443566	0.507288	0.419286
18.51	0.493154	0.426596	0.493154	0.410287
18.52	0.491235	0.442119	0.491235	0.398122
18.53	0.488528	0.441707	0.488528	0.411331
18.54	0.492475	0.447752	0.492475	0.410951
18.55	0.49001	0.444627	0.49001	0.405826
18.56	0.504329	0.452154	0.504329	0.410565
18.57	0.510994	0.450455	0.510994	0.404645
18.58	0.513448	0.441526	0.513448	0.421461
18.59	0.501837	0.440709	0.501837	0.415924
18.6	0.507556	0.449294	0.507556	0.428352
18.61	0.49498	0.454468	0.49498	0.411761
18.62	0.485731	0.45935	0.485731	0.407525
18.63	0.497876	0.464536	0.497876	0.435736
18.64	0.48261	0.468632	0.48261	0.436099
18.65	0.474412	0.464085	0.474412	0.430776
18.66	0.470822	0.459239	0.470822	0.424491
18.67	0.451126	0.46088	0.451126	0.428657
18.68	0.435327	0.444648	0.435327	0.438964
18.69	0.432516	0.451637	0.432516	0.438942
18.7	0.415526	0.442397	0.415526	0.449173
18.71	0.410171	0.453744	0.410171	0.433332
18.72	0.408532	0.454952	0.408532	0.423017
18.73	0.401234	0.437174	0.401234	0.432224
18.74	0.398809	0.440356	0.398809	0.426548
18.75	0.390329	0.444925	0.390329	0.433964
18.76	0.387779	0.444267	0.387779	0.415031
18.77	0.389707	0.445797	0.389707	0.427191
18.78	0.399079	0.437761	0.399079	0.433223
18.79	0.390375	0.442732	0.390375	0.446647
18.8	0.391425	0.436585	0.391425	0.436206
18.81	0.383707	0.424346	0.383707	0.432216
18.82	0.385041	0.41753	0.385041	0.413776
18.83	0.396586	0.400423	0.396586	0.436097
18.84	0.382034	0.404886	0.382034	0.431692
18.85	0.378622	0.41034	0.378622	0.429493
18.86	0.391369	0.403799	0.391369	0.426314
18.87	0.384375	0.423432	0.384375	0.416113
18.88	0.393997	0.426392	0.393997	0.412139
18.89	0.414683	0.417737	0.414683	0.423194
18.9	0.384839	0.421104	0.384839	0.420449
18.91	0.389305	0.41745	0.389305	0.408358
18.92	0.390631	0.433516	0.390631	0.417113
18.93	0.392187	0.427827	0.392187	0.428958
18.94	0.378425	0.430171	0.378425	0.413783
18.95	0.395261	0.419061	0.395261	0.414
18.96	0.407055	0.413967	0.407055	0.407482
18.97	0.399687	0.418089	0.399687	0.398373
18.98	0.412473	0.42283	0.412473	0.401579
18.99	0.428491	0.422517	0.428491	0.401906
19	0.416822	0.439548	0.416822	0.408265
19.01	0.416903	0.44294	0.416903	0.393483
19.02	0.421201	0.443509	0.421201	0.418884
19.03	0.418836	0.438881	0.418836	0.410923
19.04	0.403623	0.435822	0.403623	0.411468
19.05	0.406081	0.439739	0.406081	0.405002
19.06	0.427621	0.44401	0.427621	0.407725
19.07	0.42592	0.444416	0.42592	0.418107
19.08	0.427001	0.432733	0.427001	0.4177
19.09	0.429612	0.444699	0.429612	0.431674
19.1	0.431183	0.422552	0.431183	0.439751
19.11	0.431321	0.44389	0.431321	0.433924
19.12	0.42534	0.437269	0.42534	0.429685
19.13	0.423746	0.414186	0.423746	0.449348
19.14	0.41853	0.426561	0.41853	0.439544
19.15	0.42555	0.419215	0.42555	0.439434
19.16	0.434986	0.421727	0.434986	0.444795
19.17	0.434981	0.414007	0.434981	0.434192
19.18	0.446036	0.403137	0.446036	0.426986
19.19	0.434424	0.419409	0.434424	0.415039
19.2	0.43114	0.419907	0.43114	0.422743
19.21	0.435389	0.407579	0.435389	0.445255
19.22	0.438837	0.423243	0.438837	0.440674
19.23	0.45041	0.429533	0.45041	0.45579
19.24	0.436767	0.421614	0.436767	0.474475
19.25	0.432735	0.430173	0.432735	0.479815
19.26	0.435609	0.415833	0.435609	0.466814
19.27	0.423127	0.41102	0.423127	0.46785
19.28	0.426523	0.405386	0.426523	0.465443
19.29	0.433735	0.402566	0.433735	0.48219
19.3	0.427422	0.425561	0.427422	0.477279
19.31	0.432554	0.436294	0.432554	0.486295
19.32	0.424474	0.425833	0.424474	0.488344
19.33	0.440291	0.428698	0.440291	0.496659
19.34	0.427112	0.410386	0.427112	0.483253
19.35	0.426039	0.422239	0.426039	0.46839
19.36	0.42203	0.407427	0.42203	0.47554
19.37	0.439165	0.406266	0.439165	0.470509
19.38	0.443278	0.434899	0.443278	0.480587
19.39	0.431888	0.433714	0.431888	0.501775
19.4	0.433768	0.436478	0.433768	0.485764
19.41	0.446212	0.430243	0.446212	0.494182
19.42	0.442449	0.428351	0.442449	0.503126
19.43	0.440033	0.428926	0.440033	0.491869
19.44	0.451829	0.438421	0.451829	0.485658
19.45	0.436278	0.438566	0.436278	0.466678
19.46	0.428681	0.459999	0.428681	0.468199
19.47	0.426379	0.45738	0.426379	0.449868
19.48	0.426667	0.453851	0.426667	0.458346
19.49	0.423239	0.456997	0.423239	0.476767
19.5	0.428637	0.47905	0.428637	0.488065
19.51	0.428035	0.484396	0.428035	0.481898
19.52	0.431769	0.475651	0.431769	0.474627
19.53	0.416612	0.46911	0.416612	0.496855
19.54	0.419289	0.452941	0.419289	0.494771
19.55	0.433723	0.467265	0.433723	0.487317
19.56	0.426589	0.467101	0.426589	0.476015
19.57	0.426889	0.46837	0.426889	0.470569
19.58	0.42315	0.453491	0.42315	0.470801
19.59	0.429642	0.458551	0.429642	0.461245
19.6	0.432881	0.451911	0.432881	0.470536
19.61	0.427851	0.459094	0.427851	0.46516
19.62	0.427486	0.450442	0.427486	0.456392
19.63	0.412809	0.454314	0.412809	0.447273
19.64	0.413487	0.468405	0.413487	0.488584
19.65	0.414412	0.486893	0.414412	0.473337
19.66	0.414538	0.466461	0.414538	0.478818
19.67	0.424297	0.460553	0.424297	0.471511
19.68	0.430716	0.466827	0.430716	0.477737
19.69	0.414363	0.474147	0.414363	0.483277
19.7	0.435795	0.485948	0.435795	0.481422
19.71	0.439901	0.46904	0.439901	0.45673
19.72	0.438802	0.496275	0.438802	0.456828
19.73	0.431585	0.490305	0.431585	0.480781
19.74	0.437709	0.488386	0.437709	0.491947
19.75	0.443222	0.48508	0.443222	0.474678
19.76	0.428617	0.492839	0.428617	0.487113
19.77	0.423589	0.48431	0.423589	0.490303
19.78	0.418843	0.474429	0.418843	0.495219
19.79	0.421937	0.472475	0.421937	0.507869
19.8	0.418019	0.457114	0.418019	0.500415
19.81	0.424169	0.46496	0.424169	0.511925
19.82	0.426483	0.457797	0.426483	0.497642
19.83	0.422366	0.475093	0.422366	0.494694
19.84	0.424195	0.491635	0.424195	0.506577
19.85	0.433234	0.470098	0.433234	0.515806
19.86	0.434639	0.500599	0.434639	0.504214
19.87	0.425724	0.47838	0.425724	0.494363
19.88	0.425927	0.47138	0.425927	0.480043
19.89	0.427862	0.469236	0.427862	0.497649
19.9	0.420086	0.47113	0.420086	0.486768
19.91	0.412834	0.493171	0.412834	0.502094
19.92	0.418231	0.473164	0.418231	0.496544
19.93	0.436661	0.466001	0.436661	0.519411
19.94	0.425778	0.47245	0.425778	0.515537
19.95	0.417229	0.452447	0.417229	0.520013
19.96	0.418646	0.464408	0.418646	0.528367
19.97	0.438969	0.466361	0.438969	0.523356
19.98	0.424506	0.472806	0.424506	0.505928
[truncated: 3,002 more rows]

## Sheet: MMPBSA
						Pentamer_M CMV					Pentamer_Q CMV			Hexamer- Q-CMV			Hexamer- M-CMV
van der Waal energy	=	-36.323	+/-	0.162		-150.32	0.62	-150.32+/-0.62	-331.41	0.37	-331.41+/-0.37	-157.6	0.32	-157.6+/-0.32	-143.77	0.54	-143.77+/-0.54
Electrostattic energy	=	-69.903	+/-	0.439		-743.45	0.06	-743.45+/-0.06	-1476.68	0.76	-1476.68+/-0.76	-693.47	0.08	-693.47+/-0.08	-712.51	0.17	-712.51+/-0.17
Polar solvation energy	=	293.026	+/-	0.654		183.73	0.75	183.73+/-0.75	198.11	0.53	198.11+/-0.53	188.32	0.33	188.32+/-0.33	205.87	0.45	205.87+/-0.45
SASA energy	=	-11.036	+/-	0.027		-37.58	0.09	-37.58+/-0.09	-82.8525	0.98	-82.8525+/-0.98	-39.4	0.47	-39.4+/-0.47	-35.9425	0.43	-35.9425+/-0.43
Binding energy	=	175.758	+/-	0.474		-710.04	0.56	-710.04+/-0.56	-1609.98	0.13	-1609.98+/-0.13	-662.75	0.46	-662.75+/-0.46	-650.41	0.2	-650.41+/-0.2
		175.764				-747.62		0
